# Supplementary material
Source: PubMed Central journal article supplement (PMC1366942)

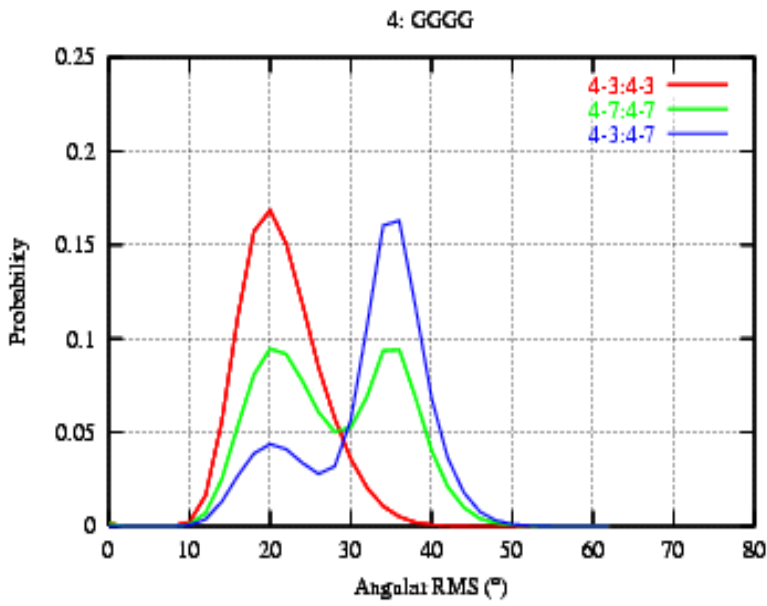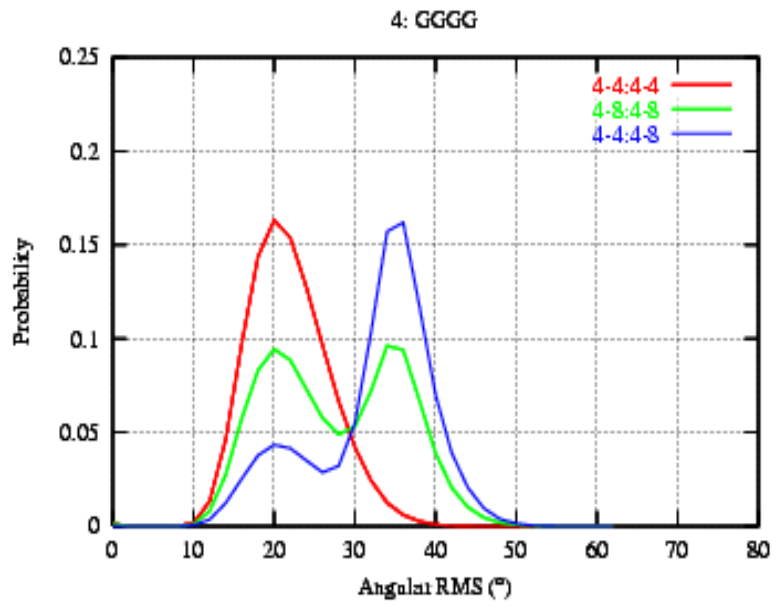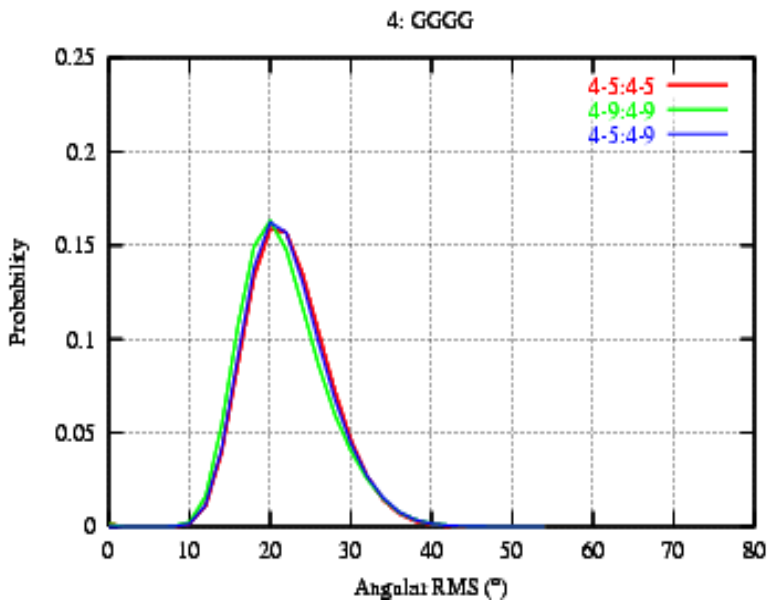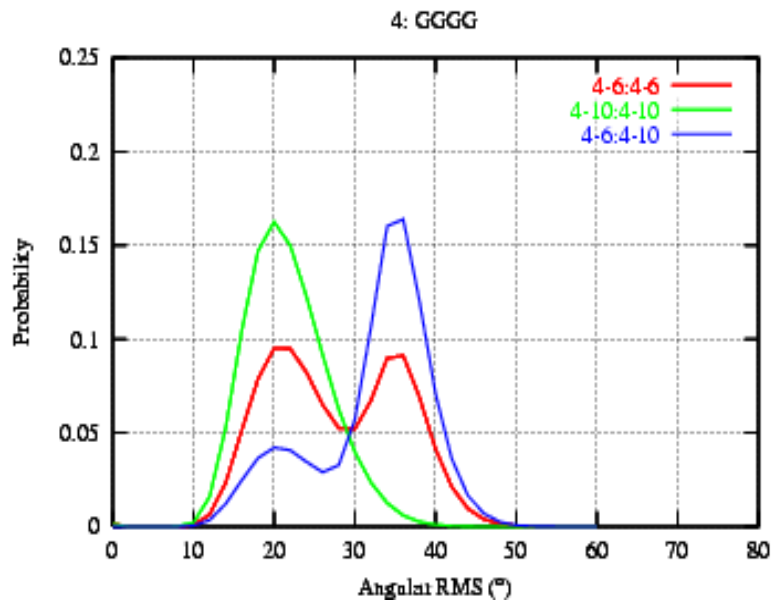

6: GGTA

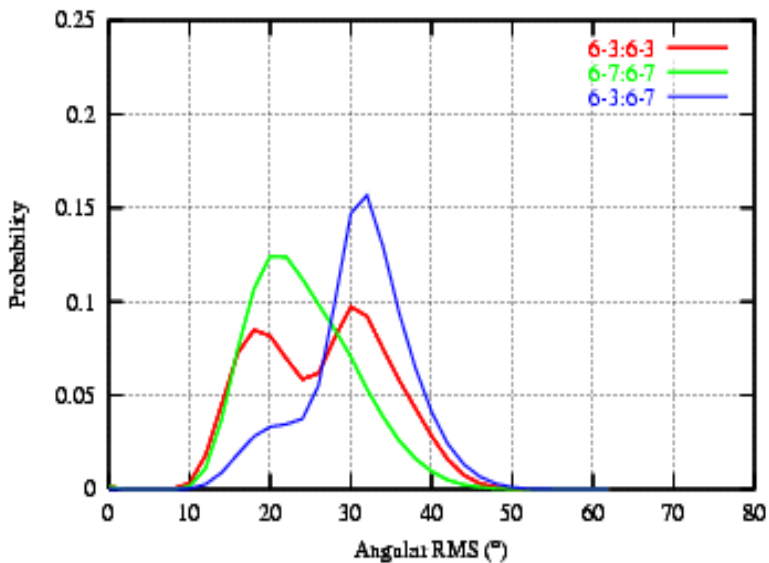

6: GTAG

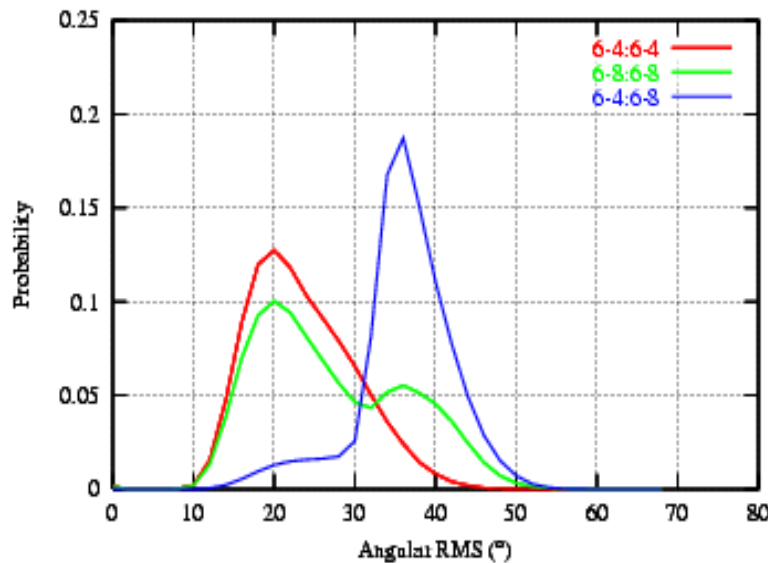

6: TAGG

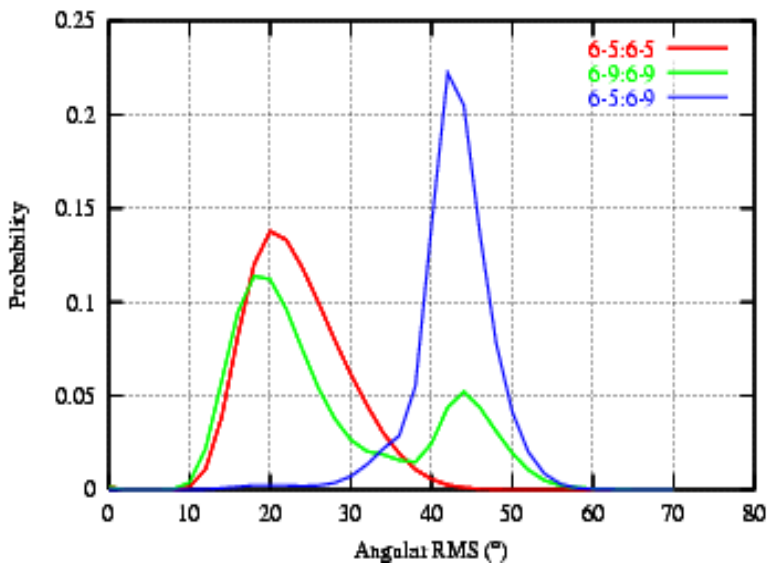

6: AGGT

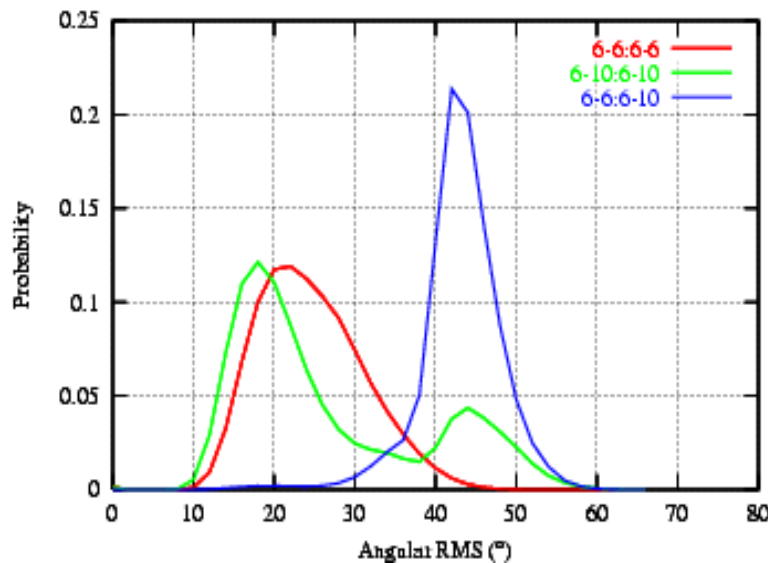

7: AATG

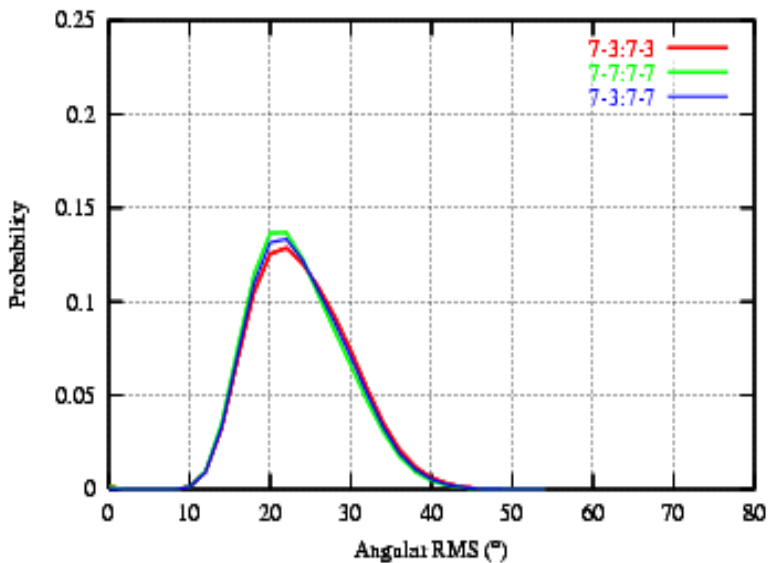

7: ATGA

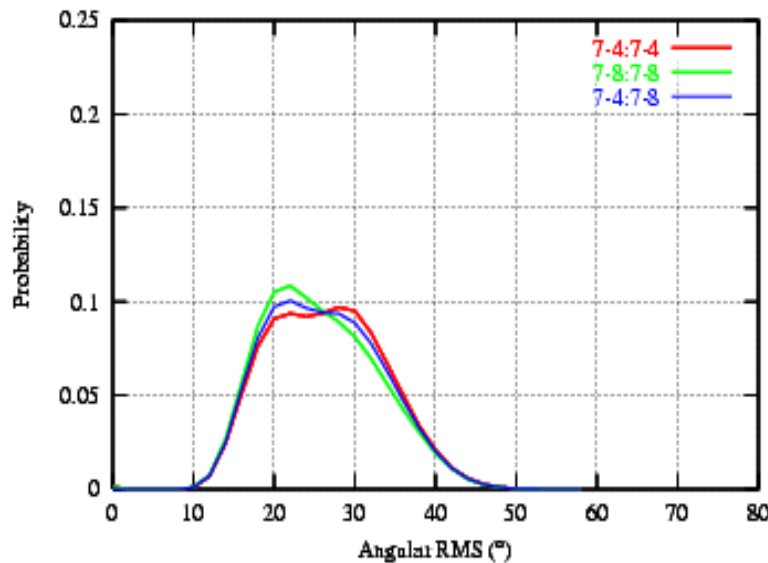

7: TGAA

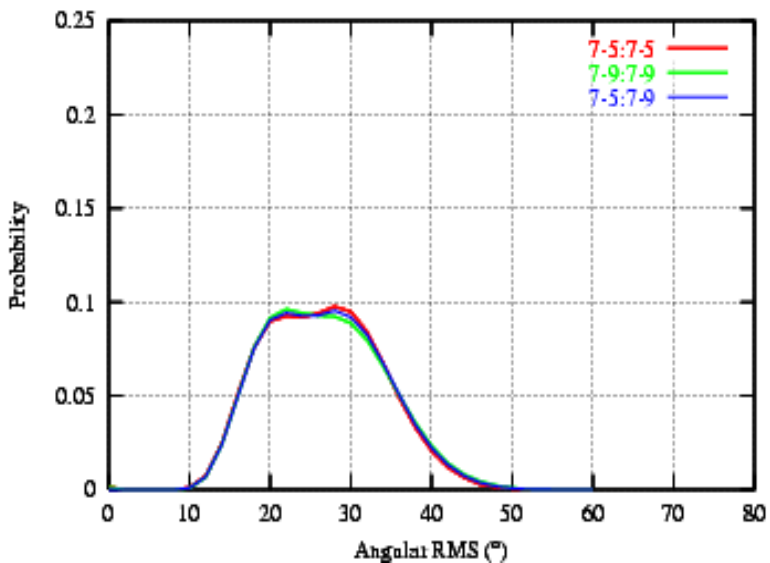

7: GAAT

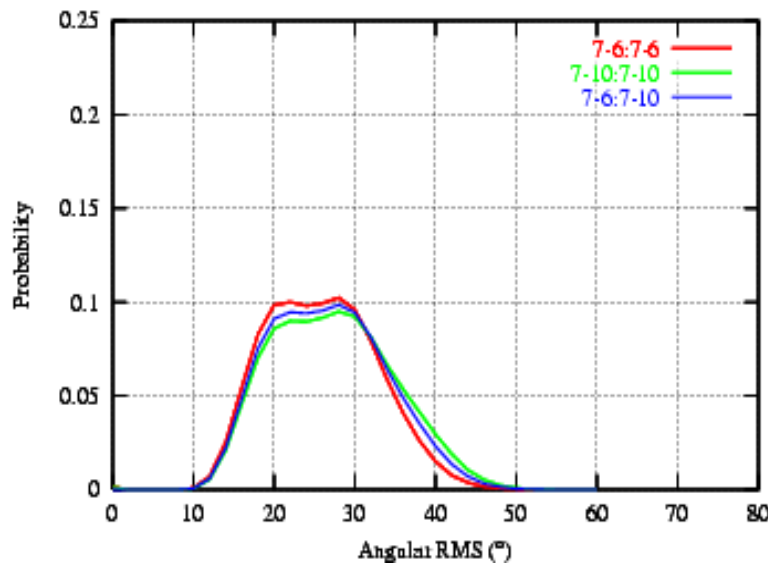

8: GATC

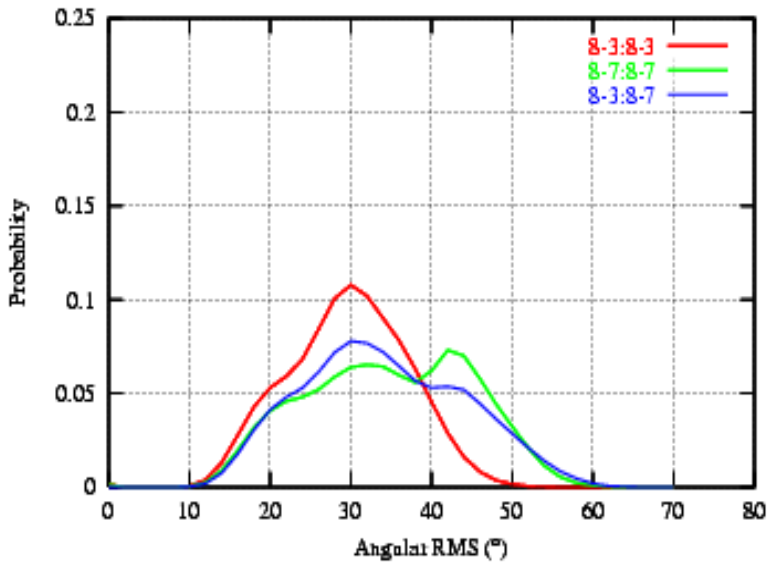

8: ATCG

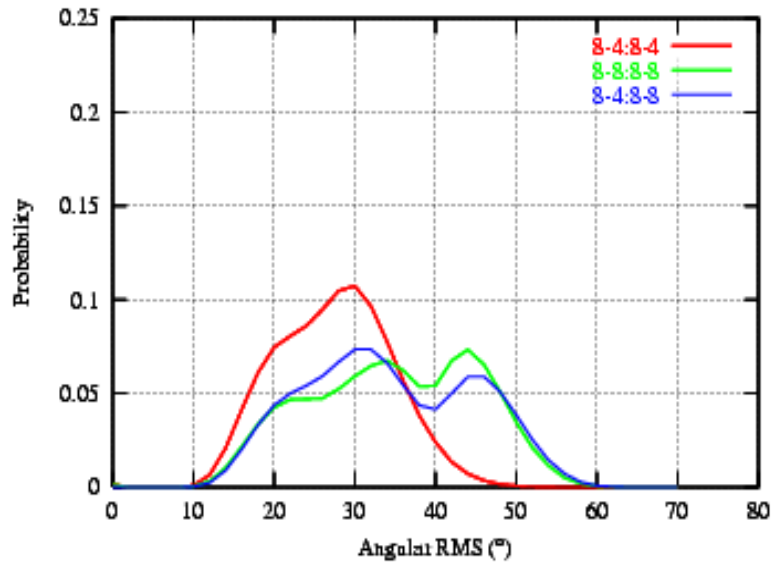

8: TCGA

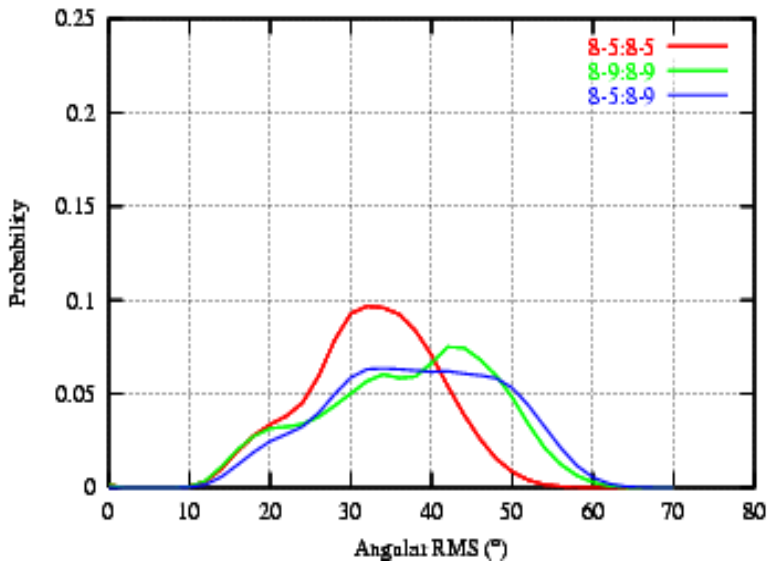

8: CGAT

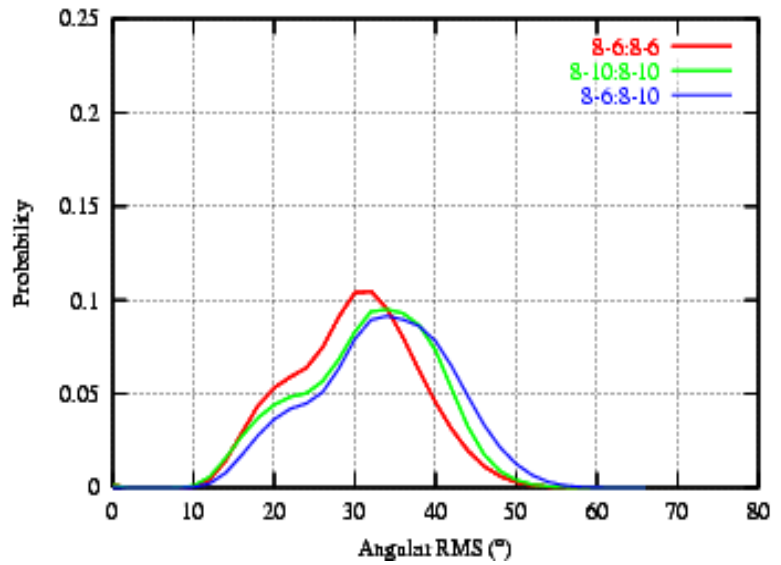

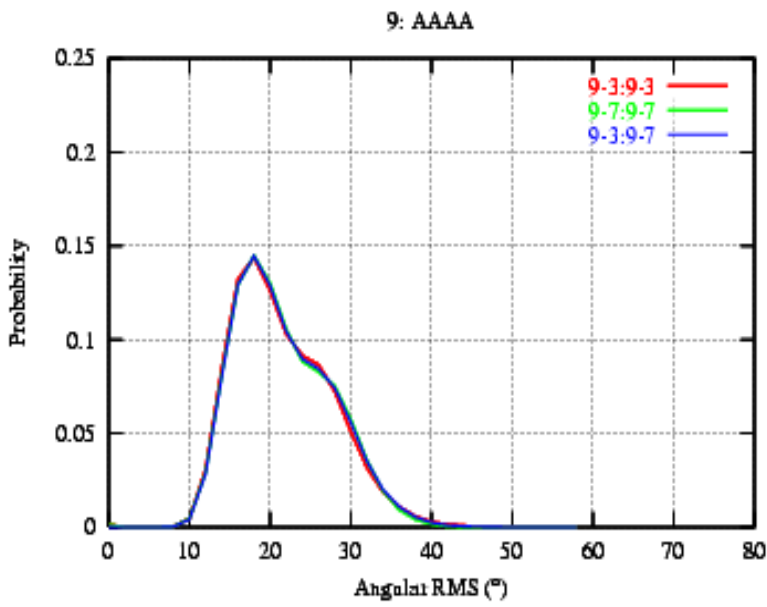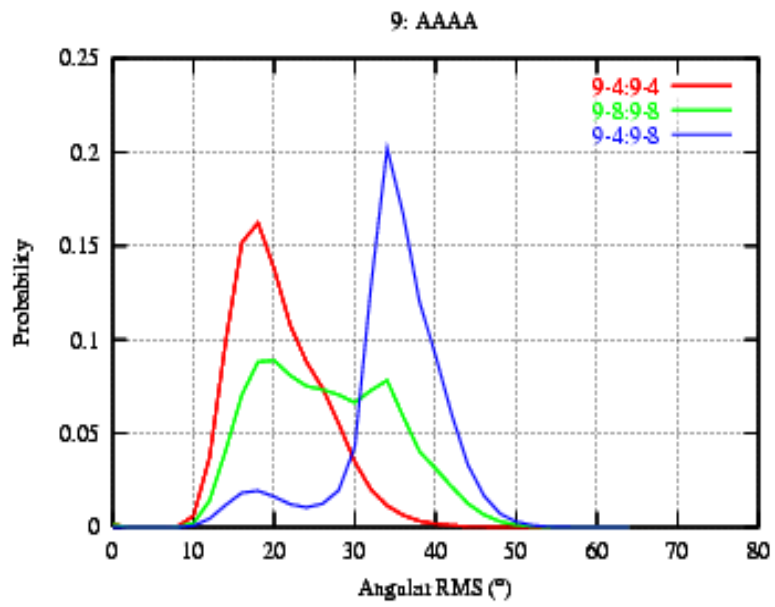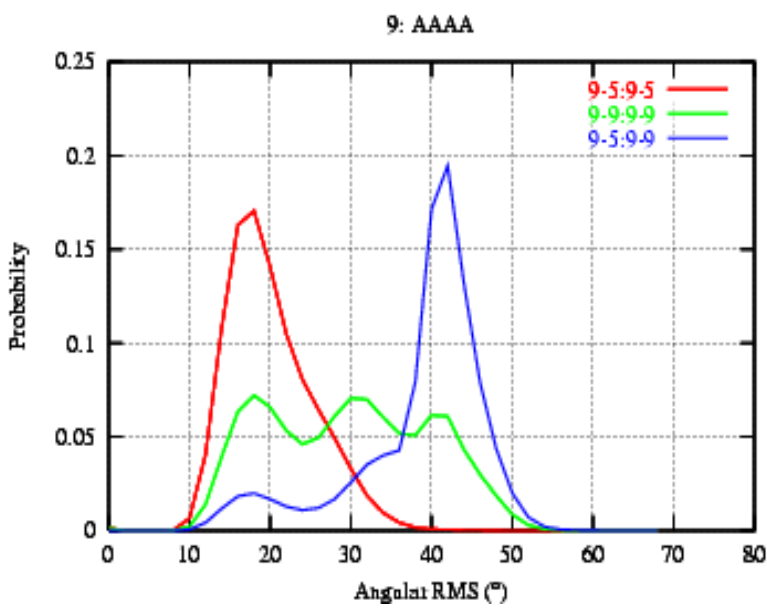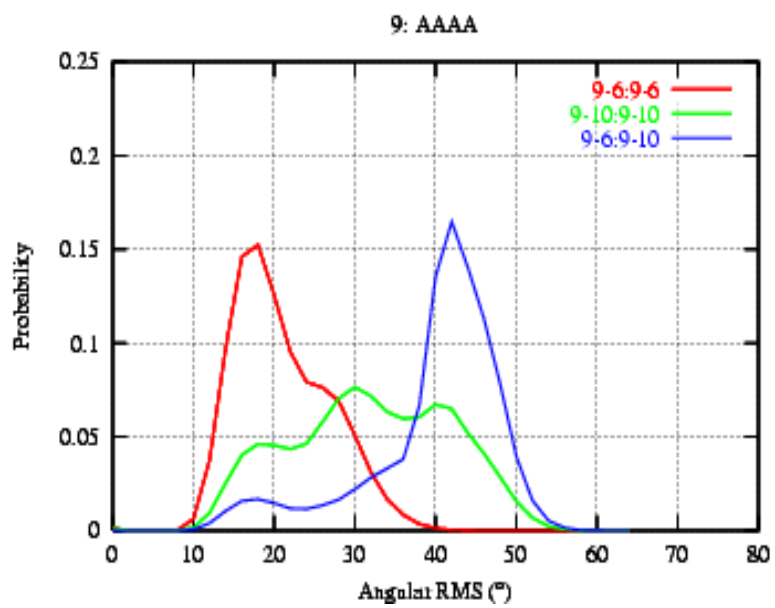

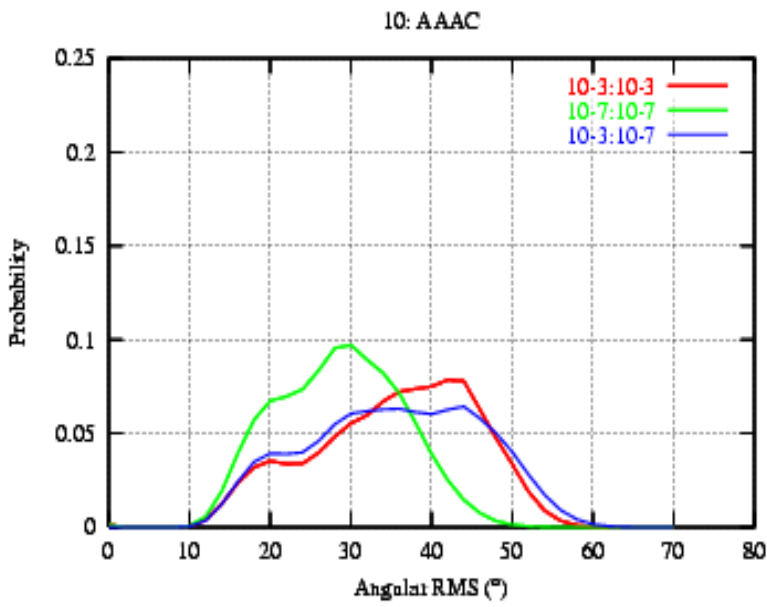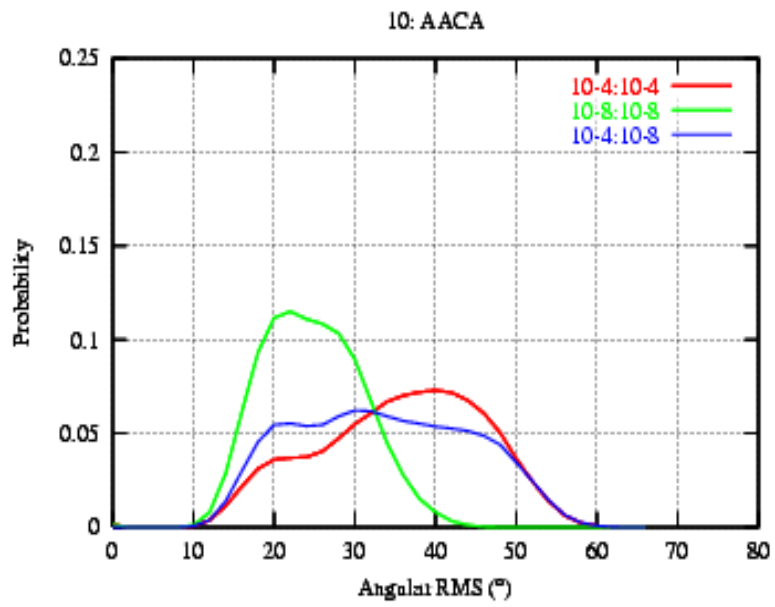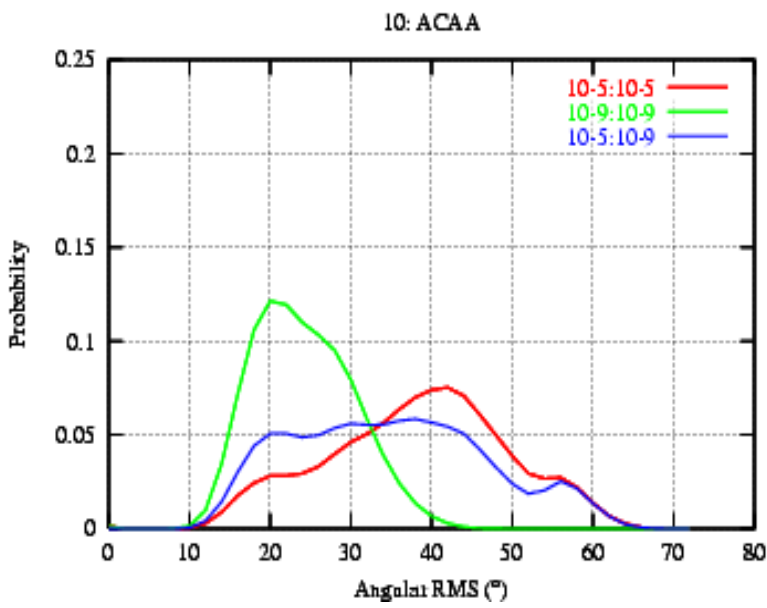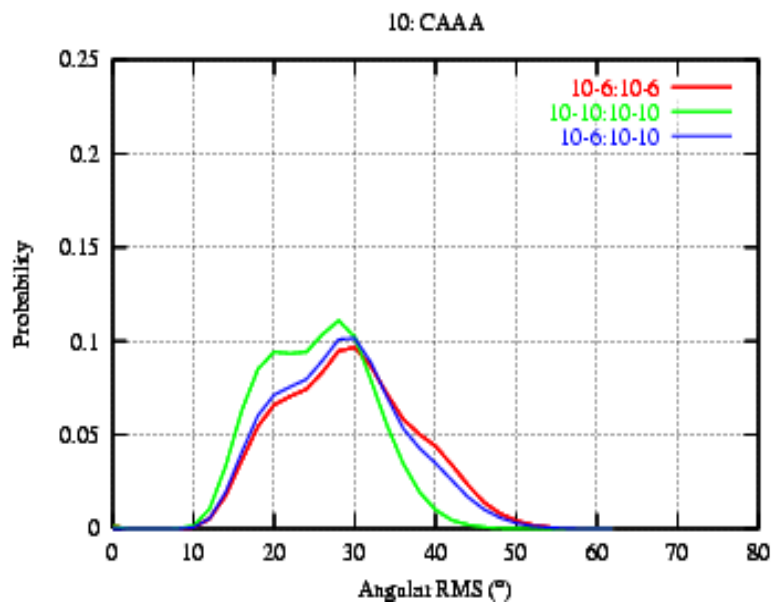

11: GGAT

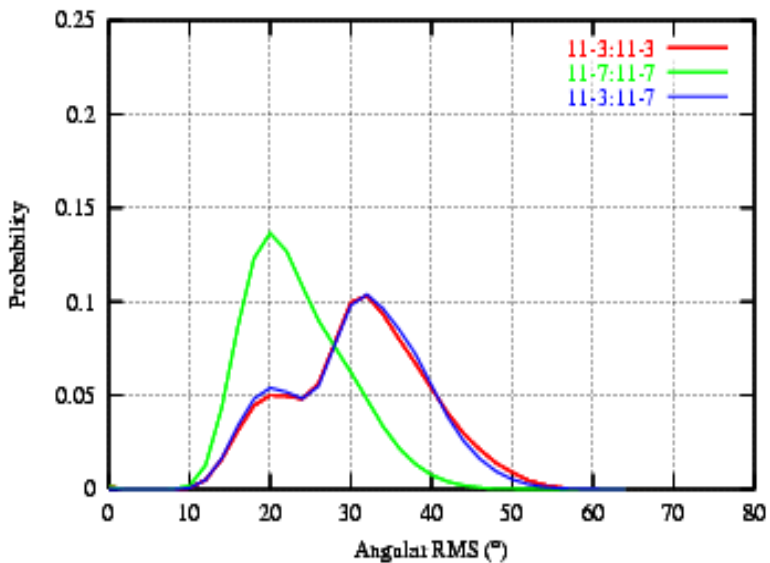

11: GATG

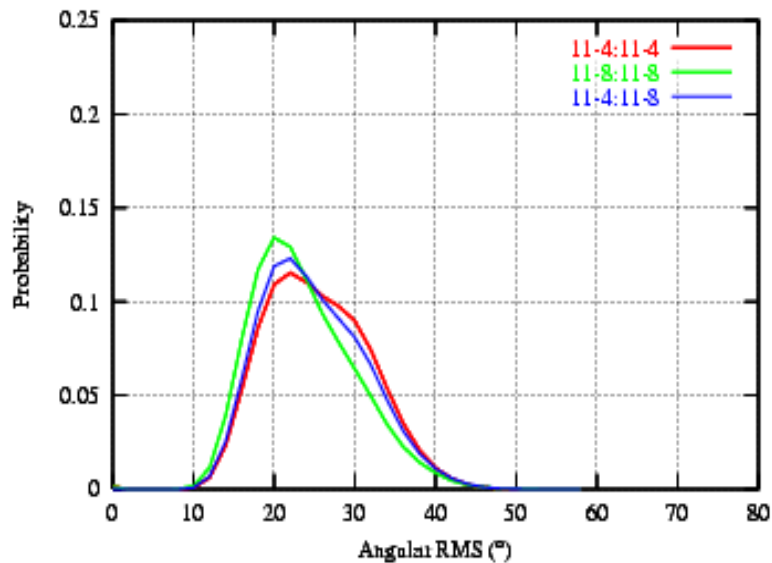

11: ATGG

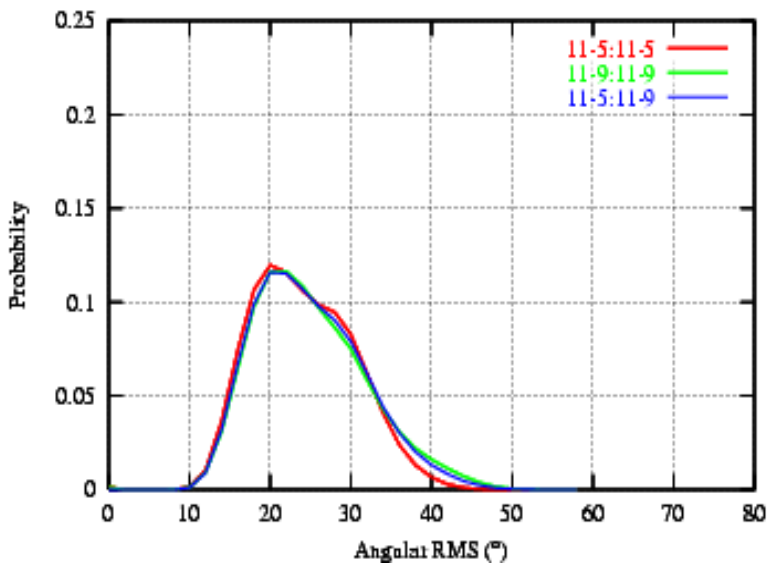

11: TGGA

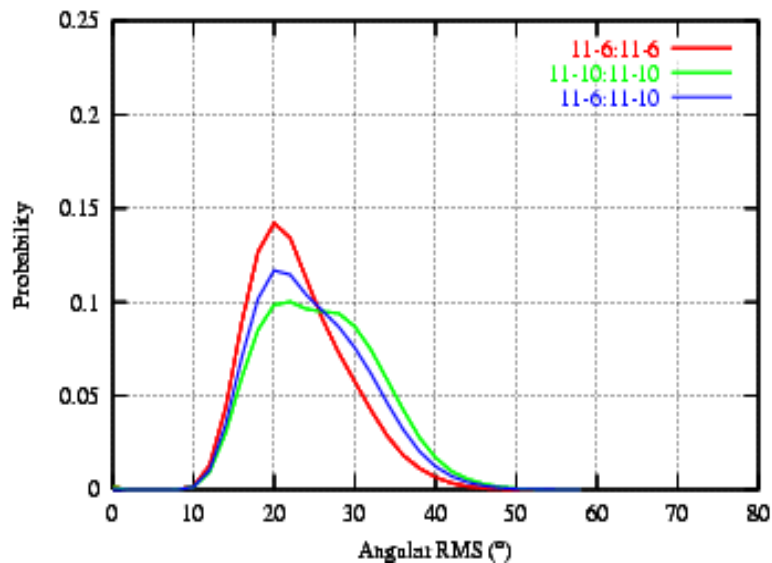

12: GAGT

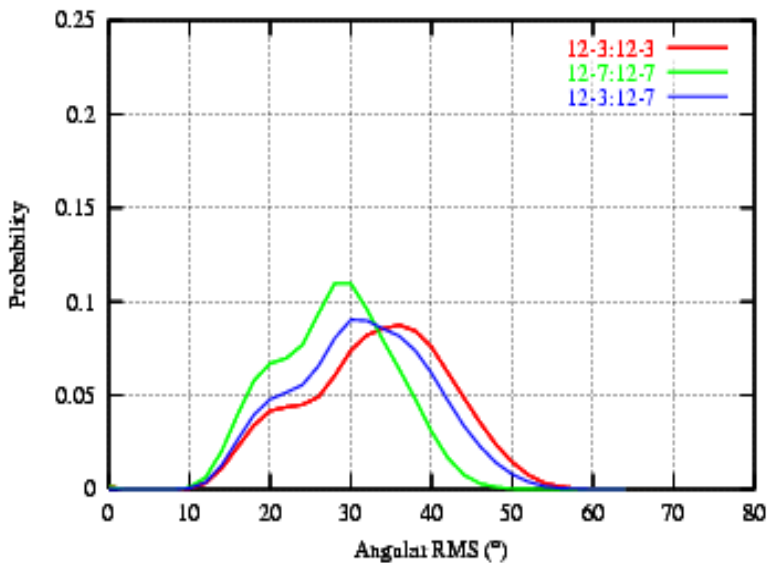

12: AGTG

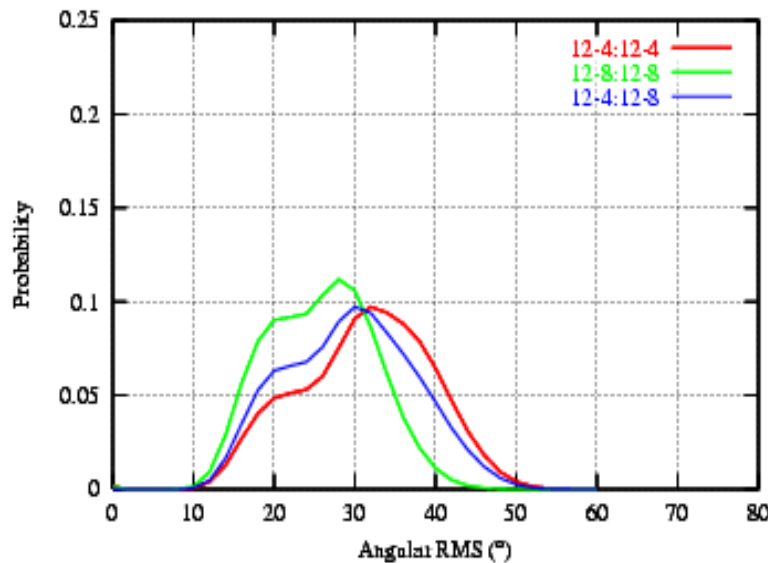

12: GTGA

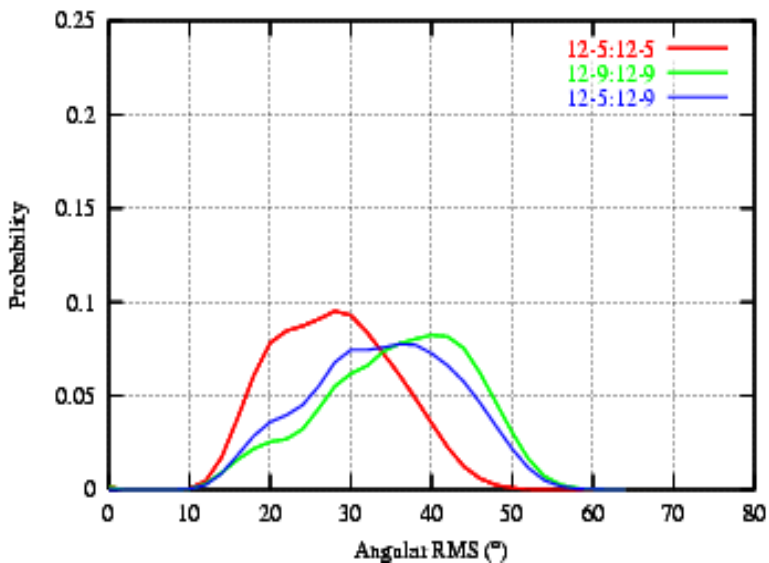

12: TGAG

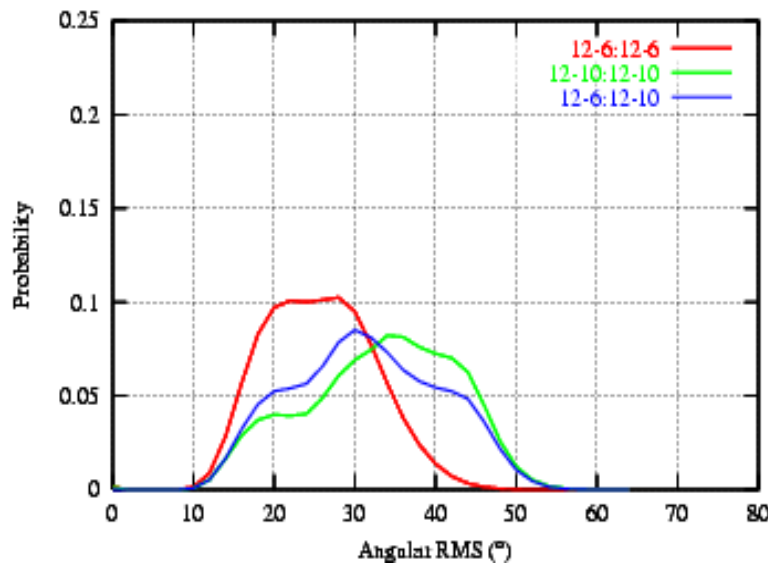



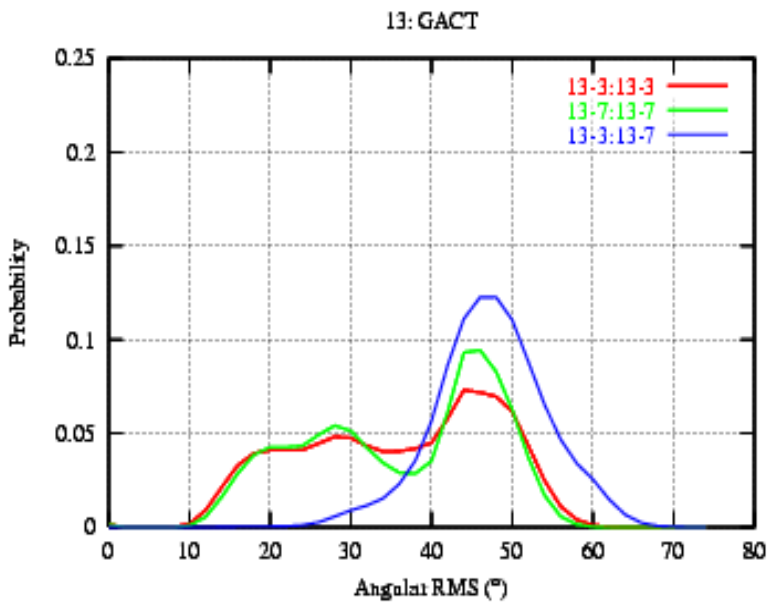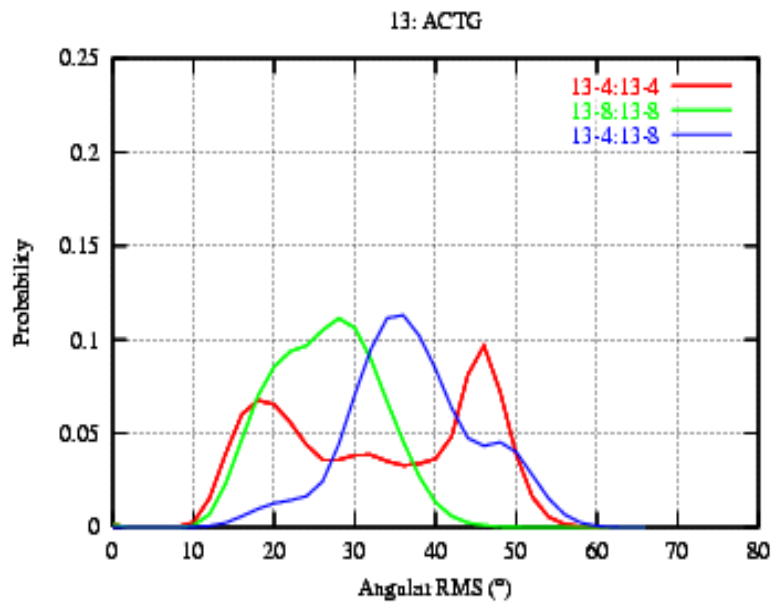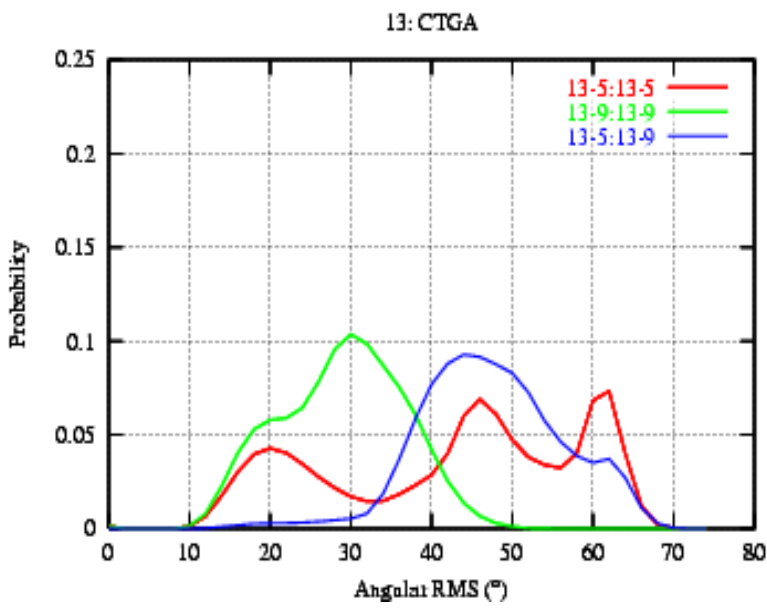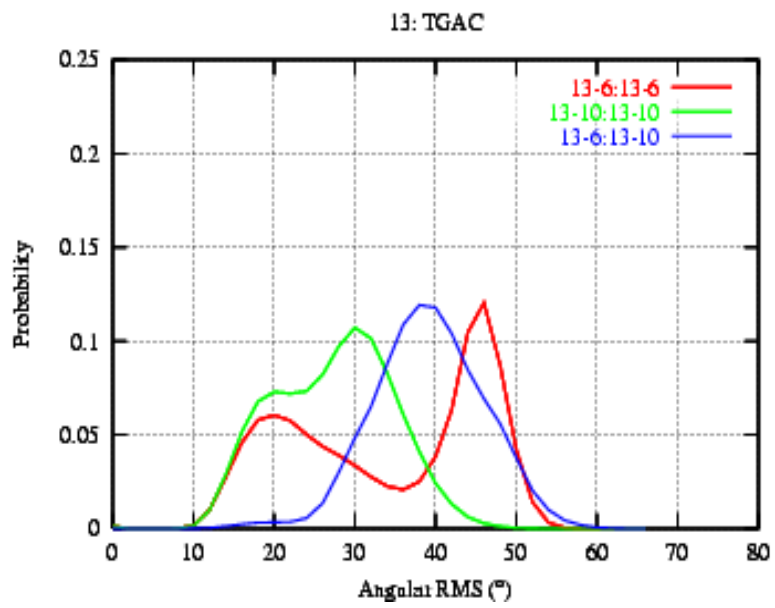

5: AAAG

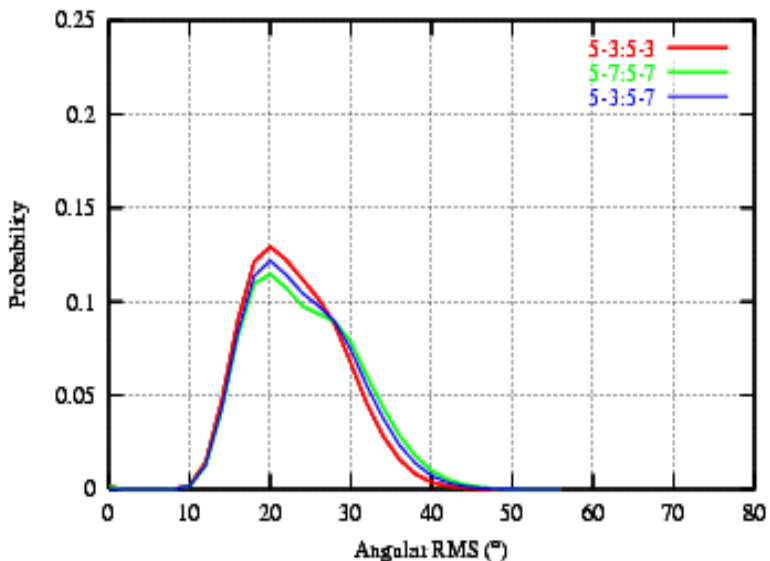

5: AAGA

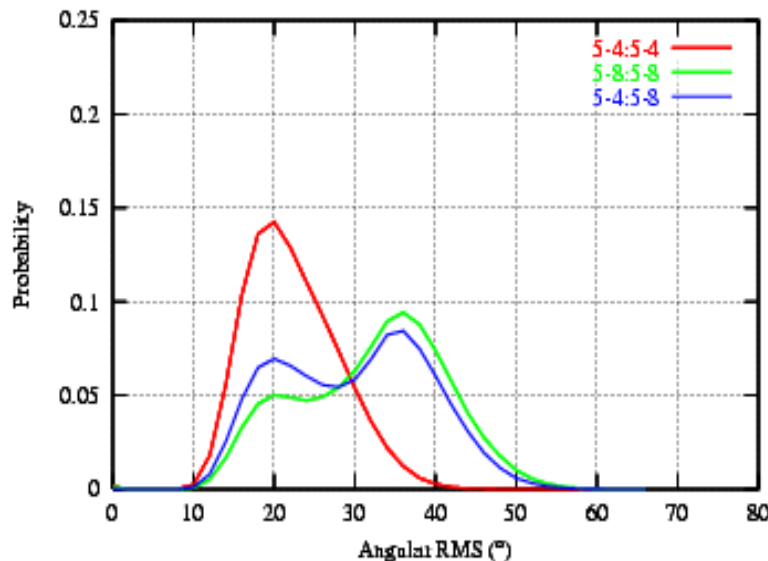

5: AGAA

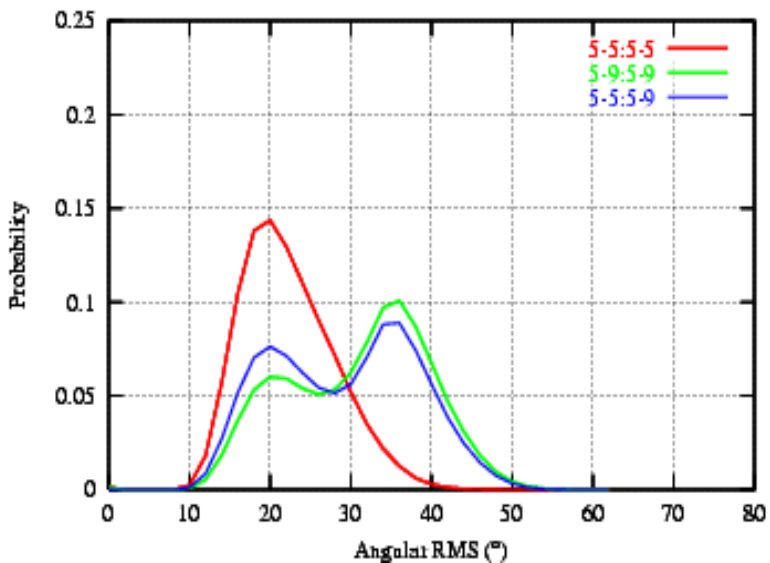

5: GAAA

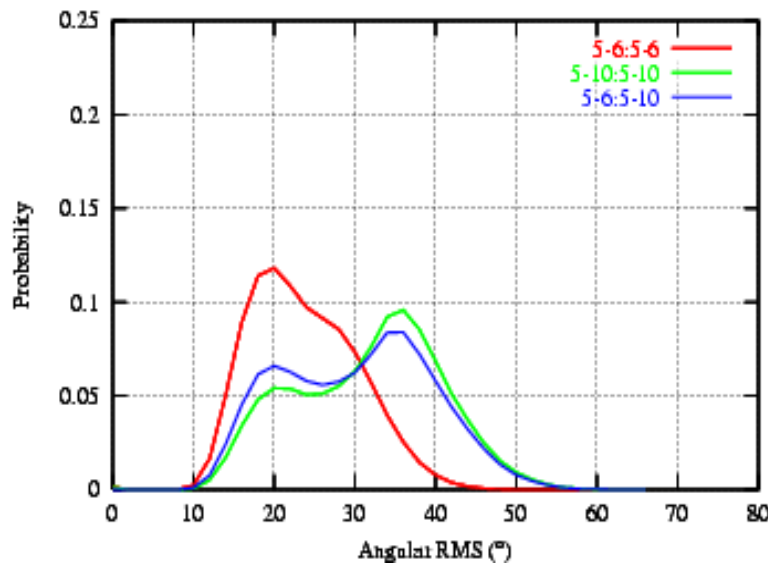

14: GCGC

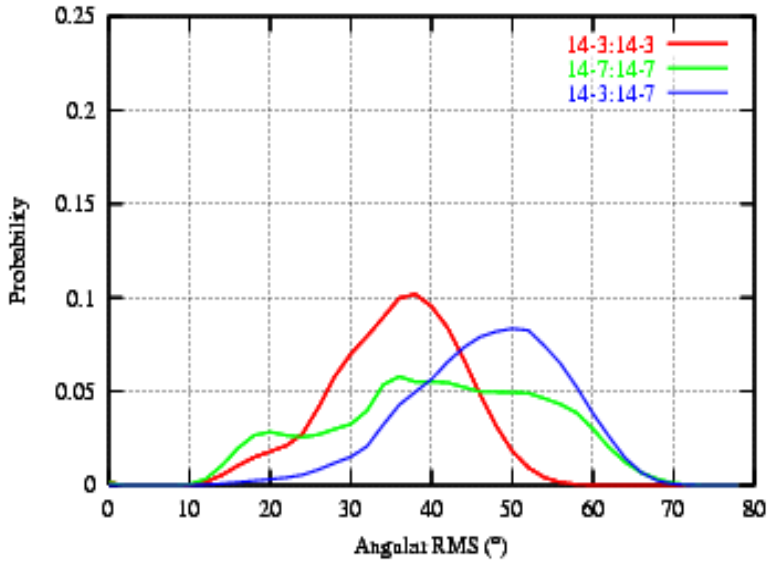

14: CGCG

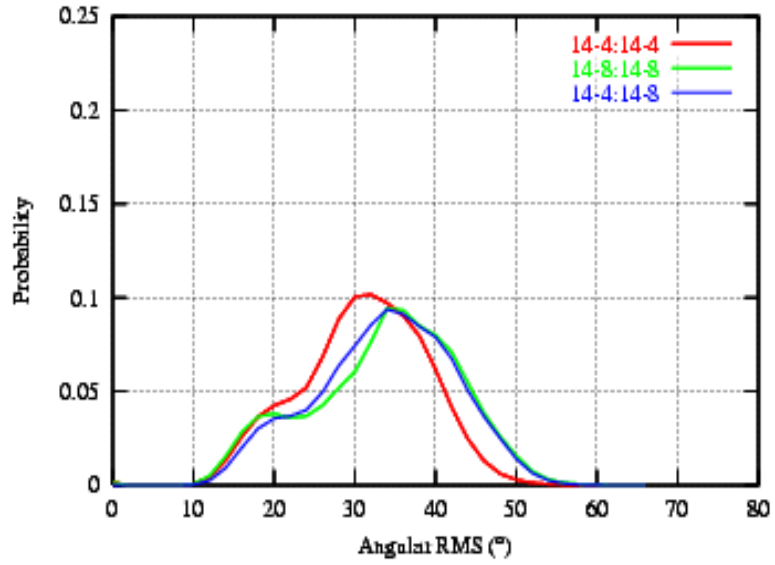

14: GCGC

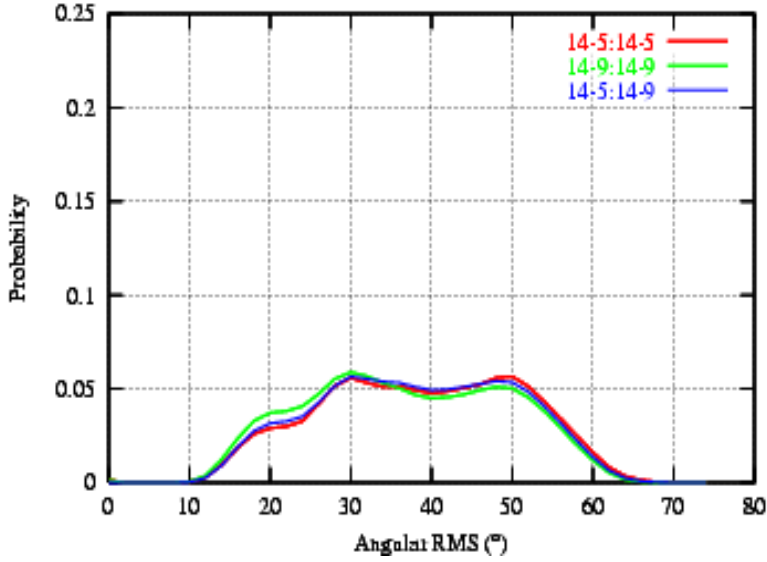

14: CGCG

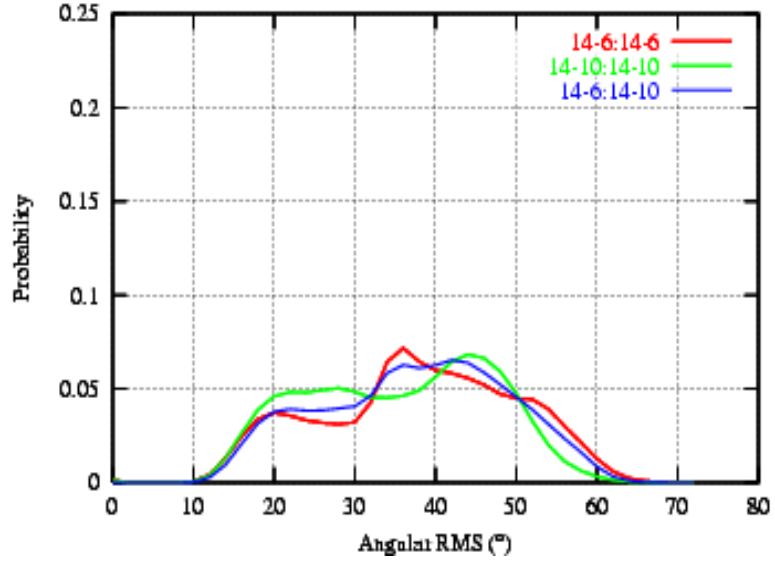

15: AAAT

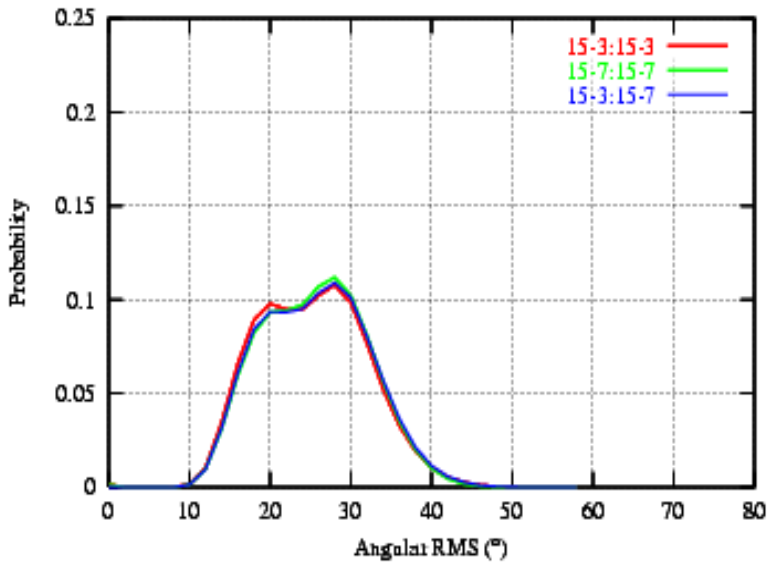

15: AATA

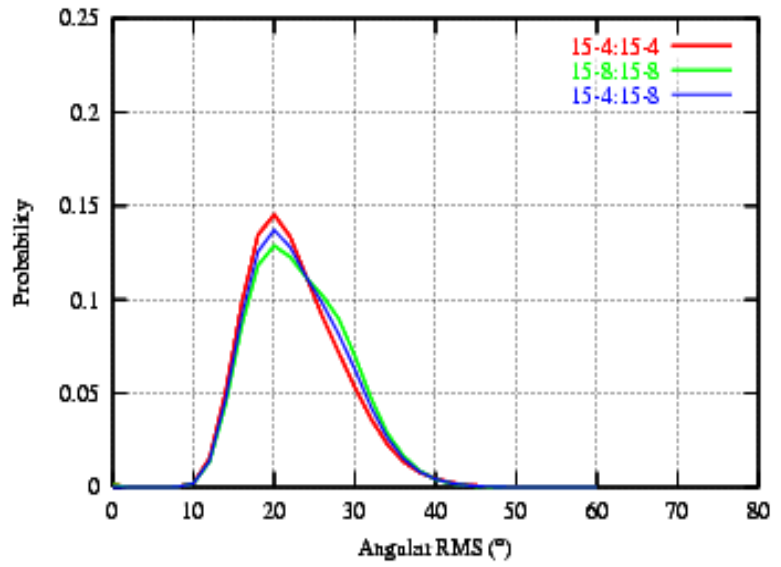

15: ATAA

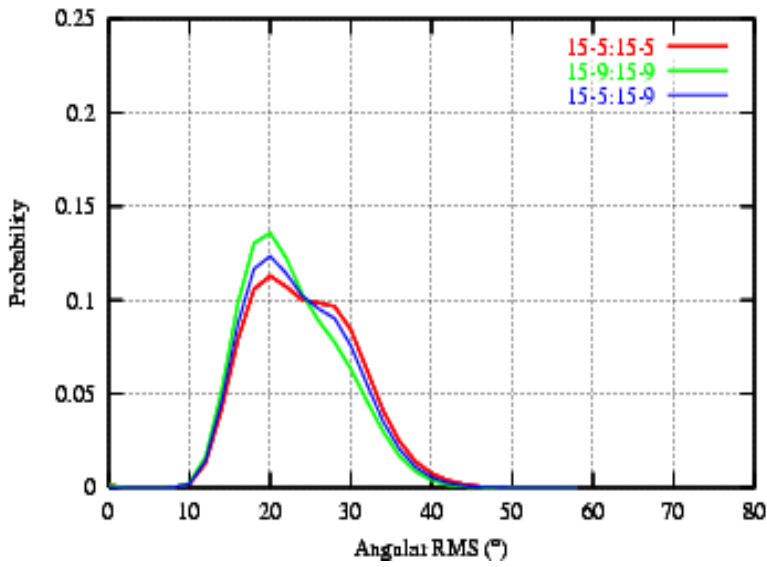

15: TAAA

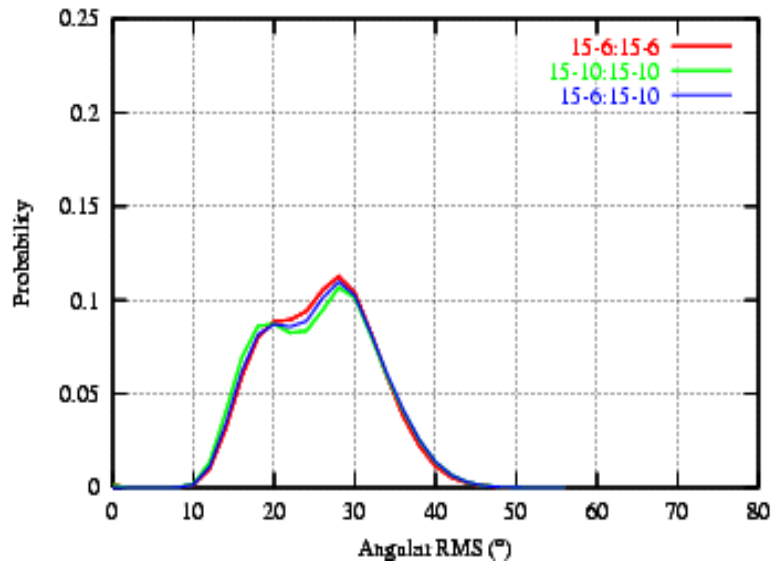

16: GGTC

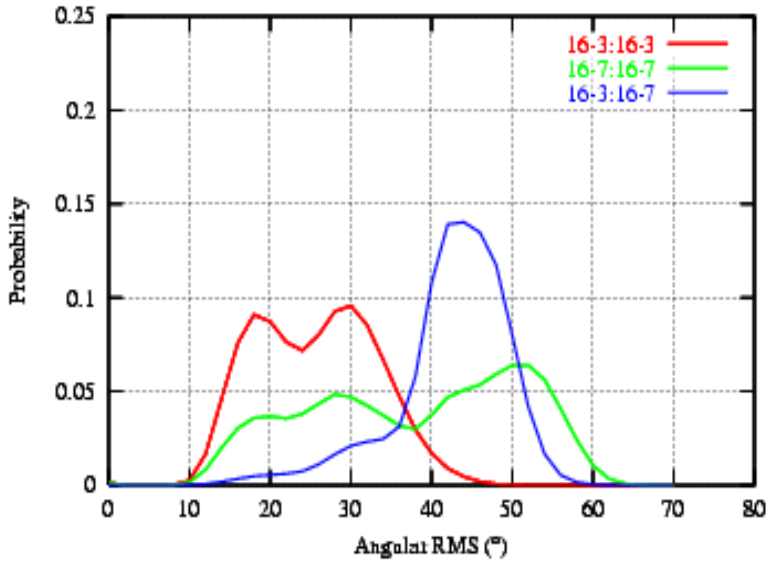

16: GTCC

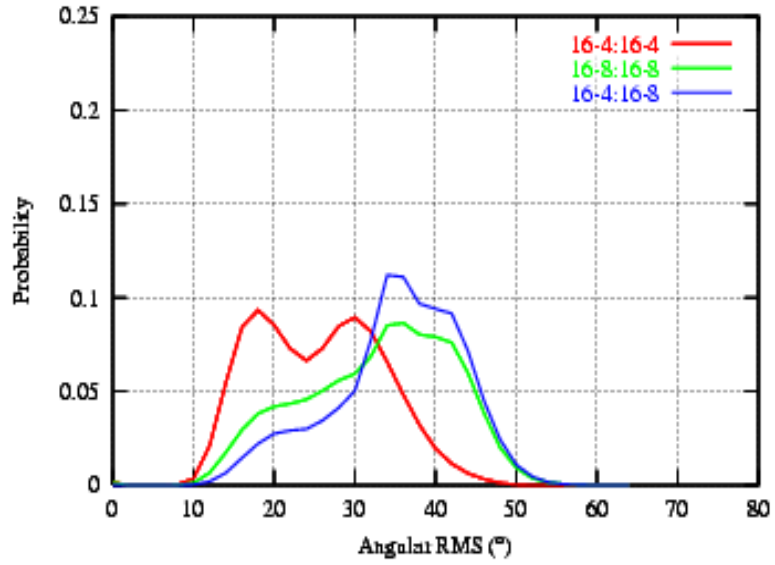

16: TCGG

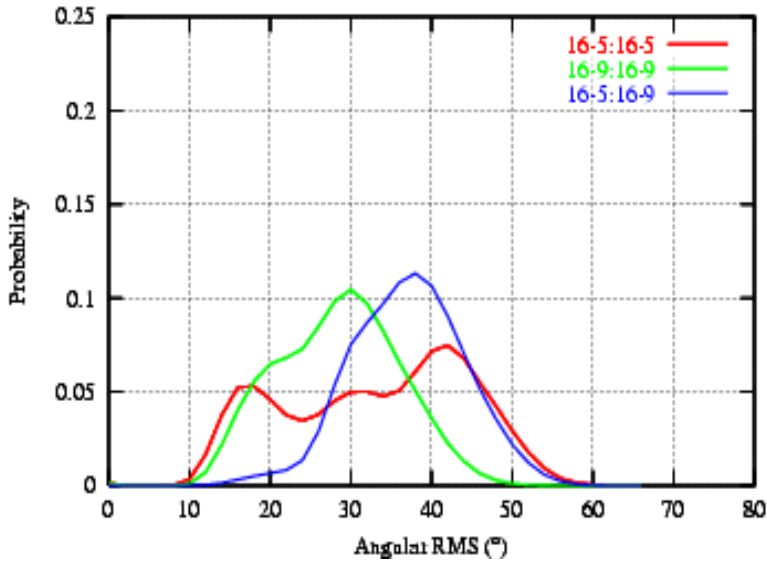

16: CGGT

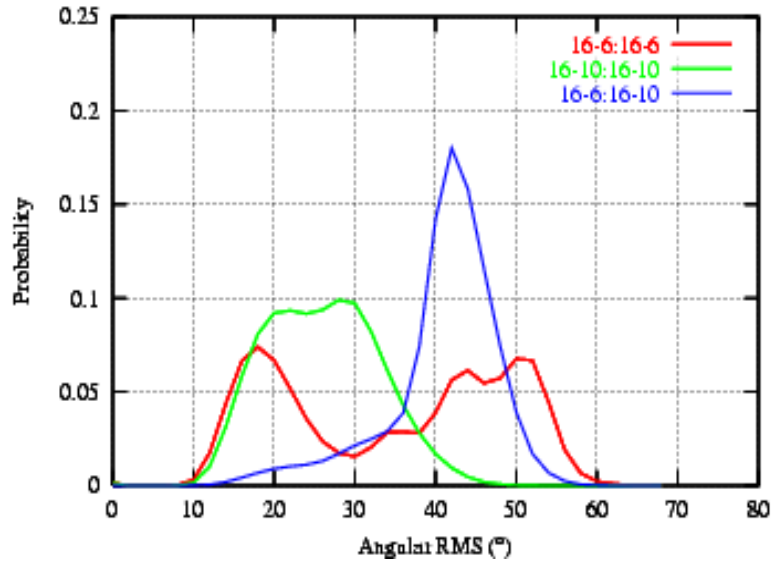

17: GAGC

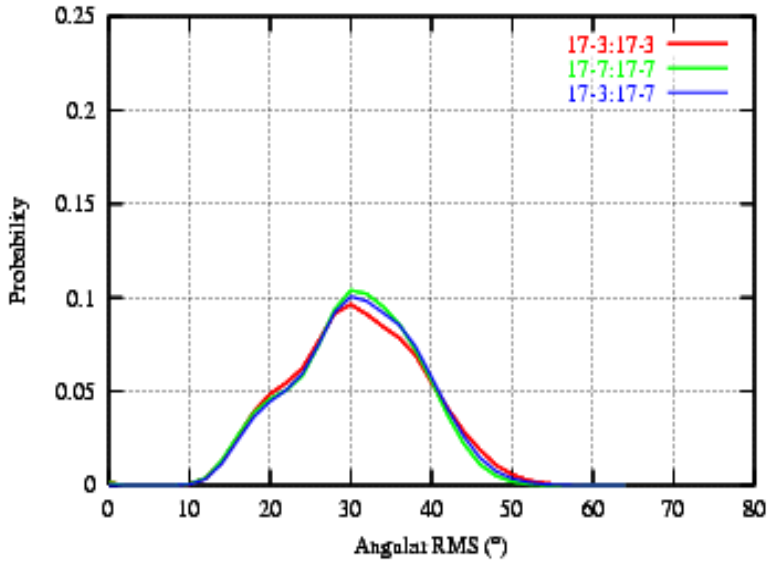

17: AGCG

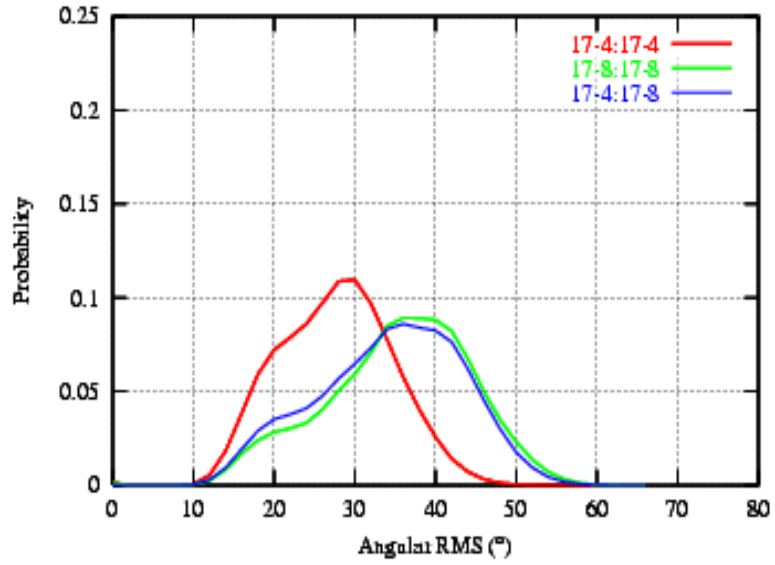

17: GCGA

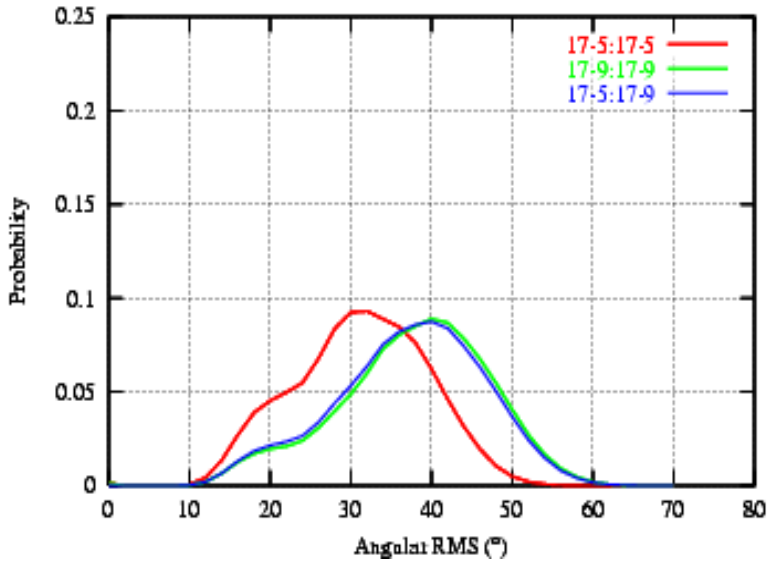

17: CGAG

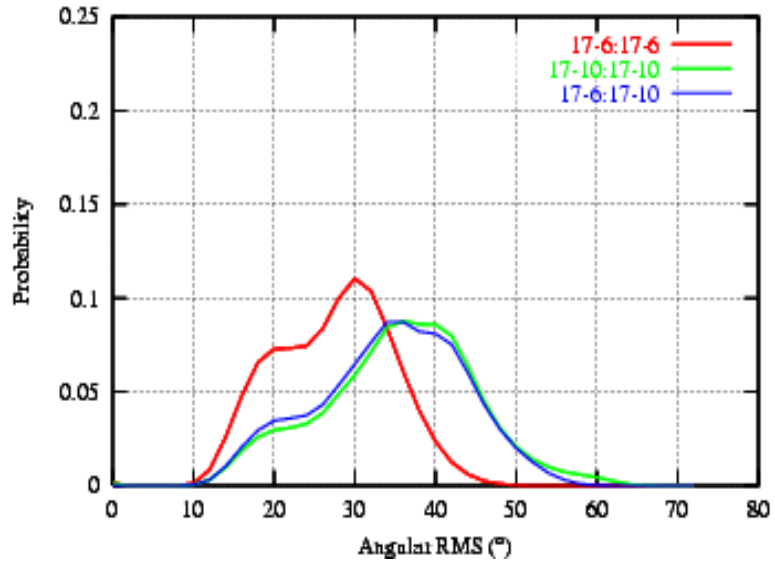

18: GTAC

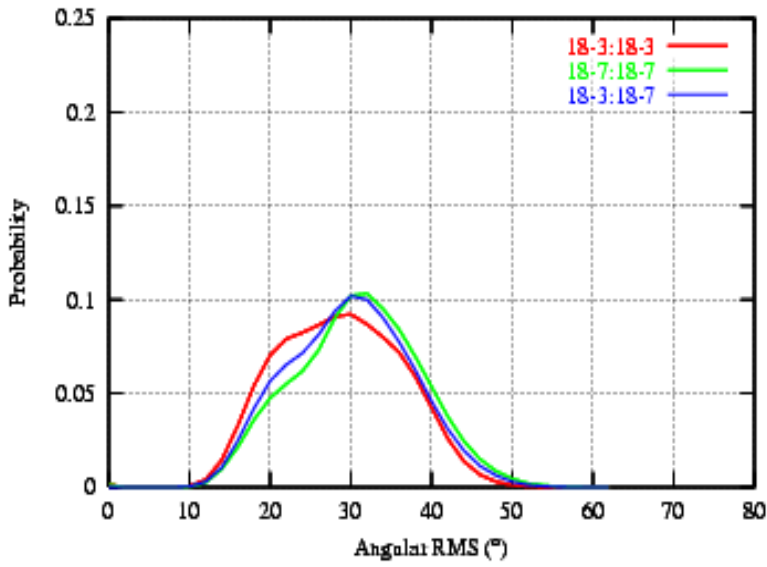

18: TACG

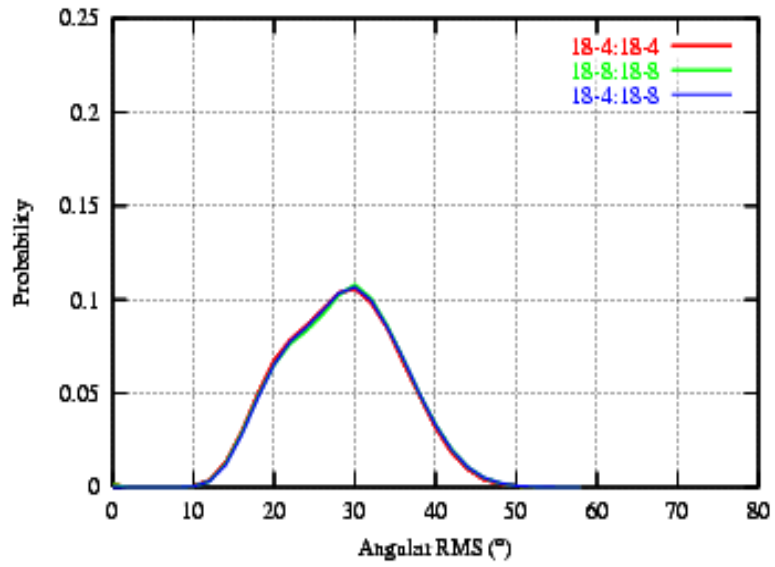

18: ACGT

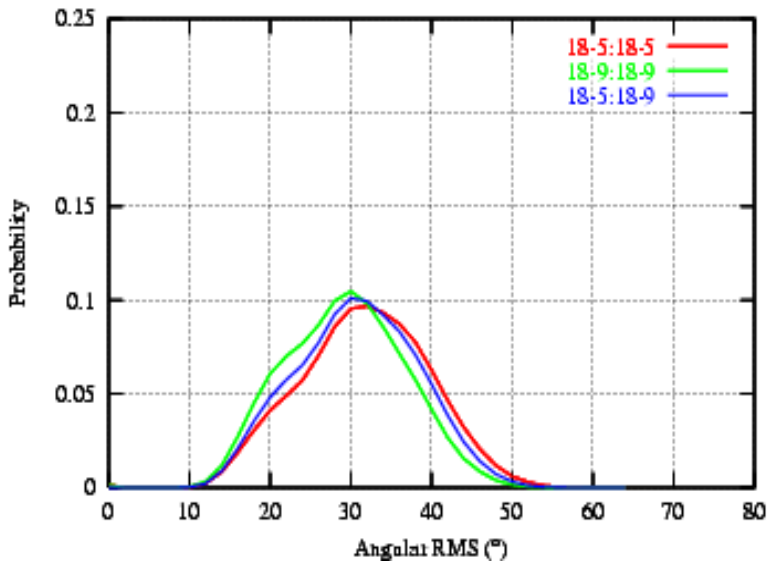

18: CGTA

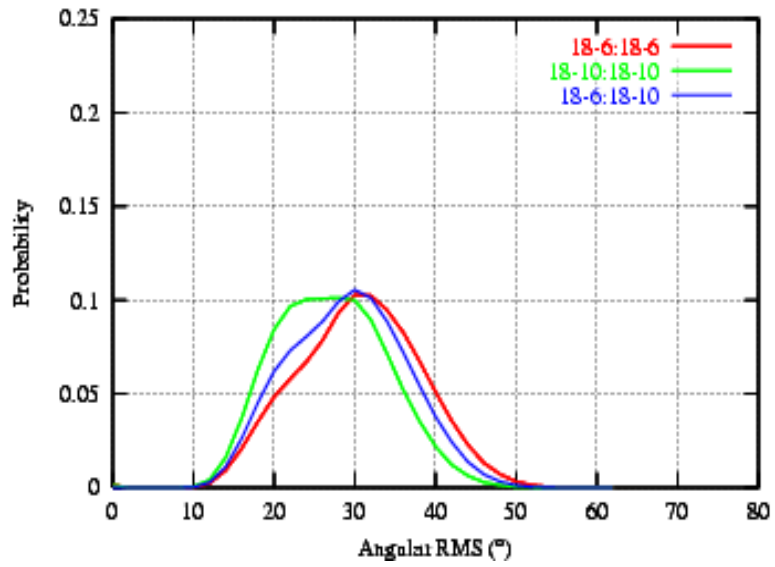

19: ATAT

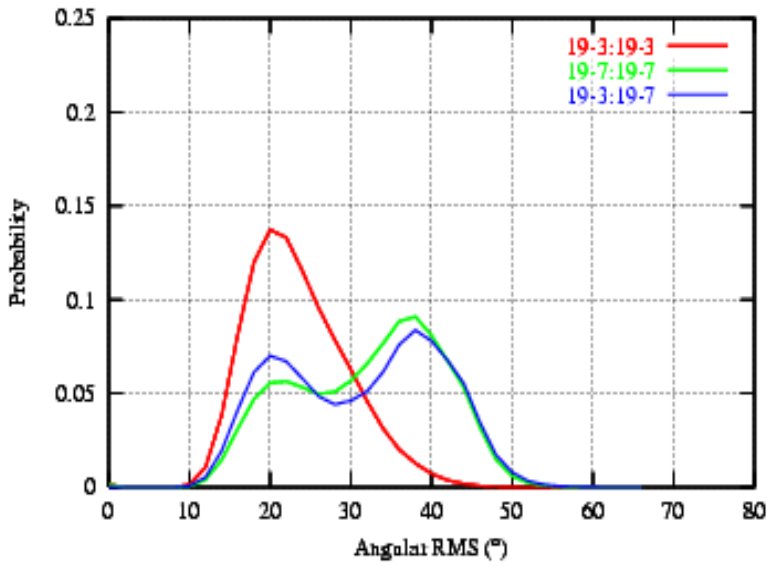

19: TATA

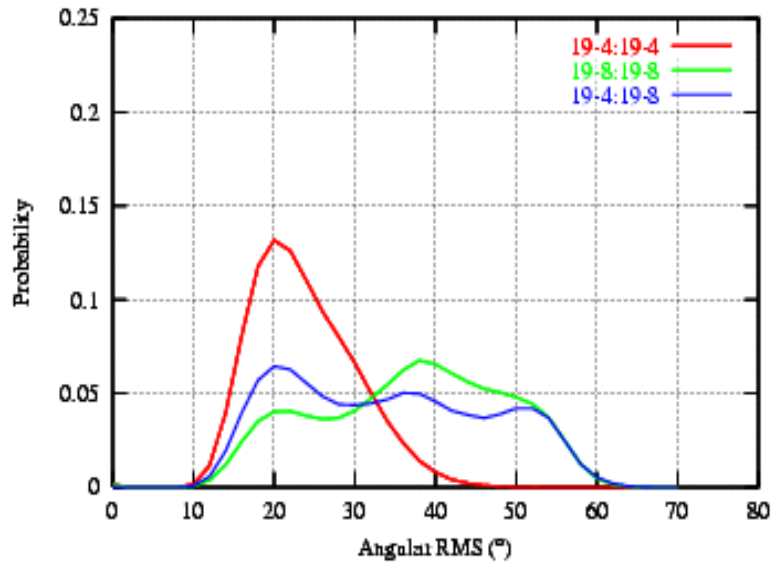

19: ATAT

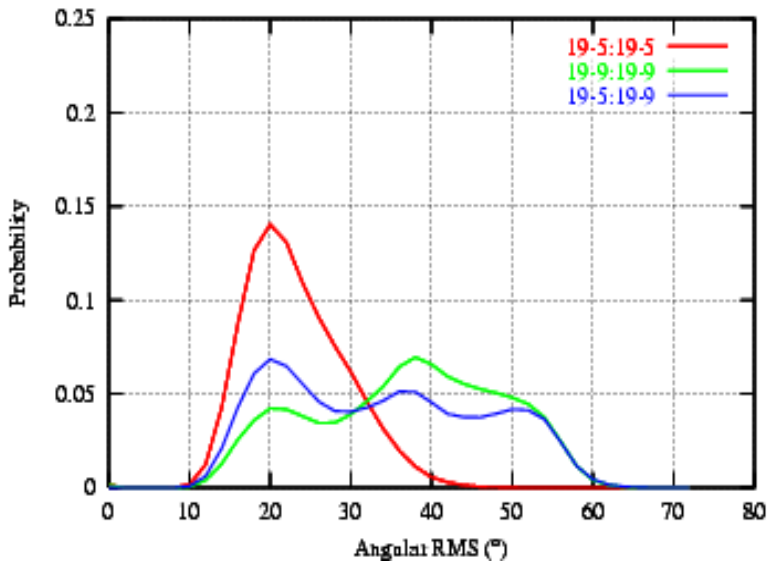

19: TATA

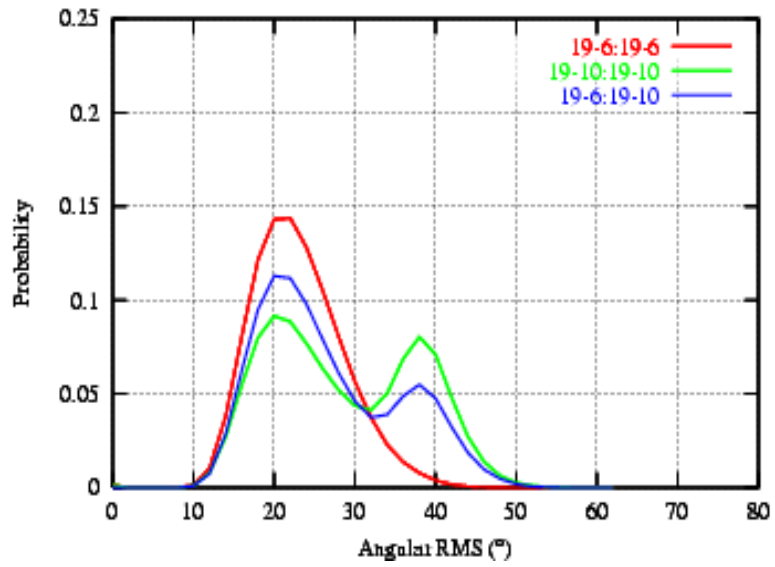



20: GGCC

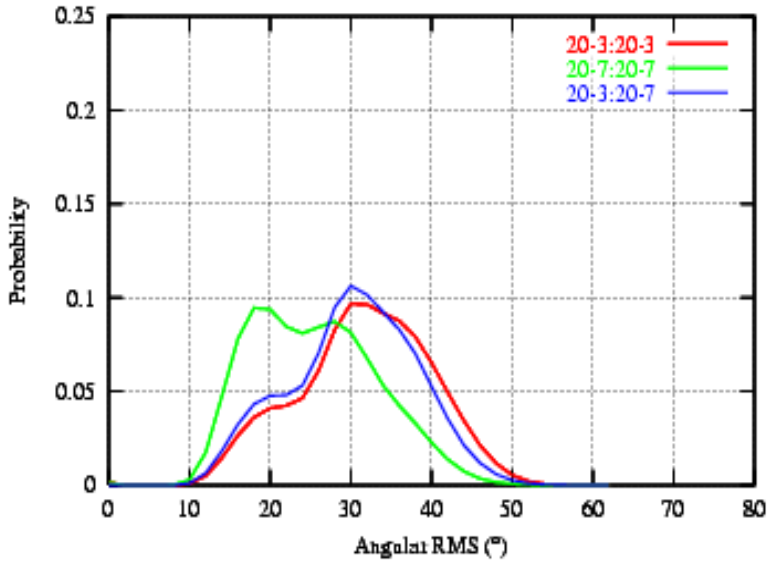

20: GCCG

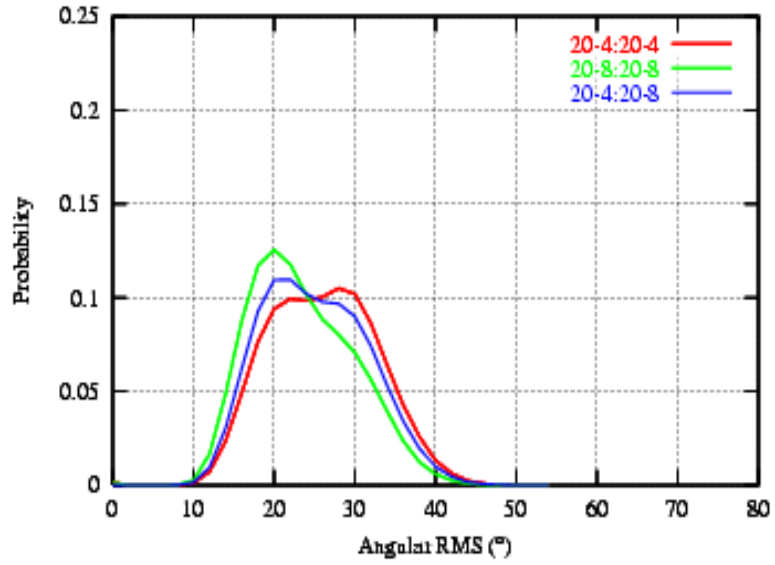

20: CCGG

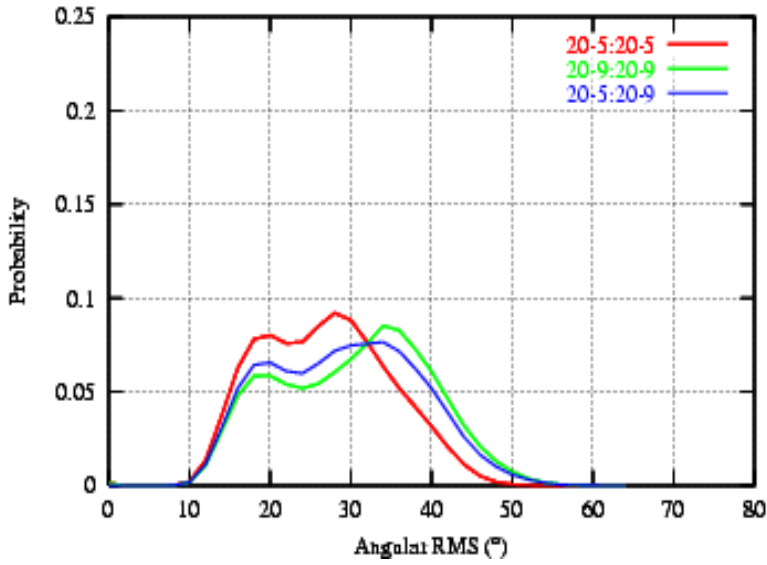

20: CGGC

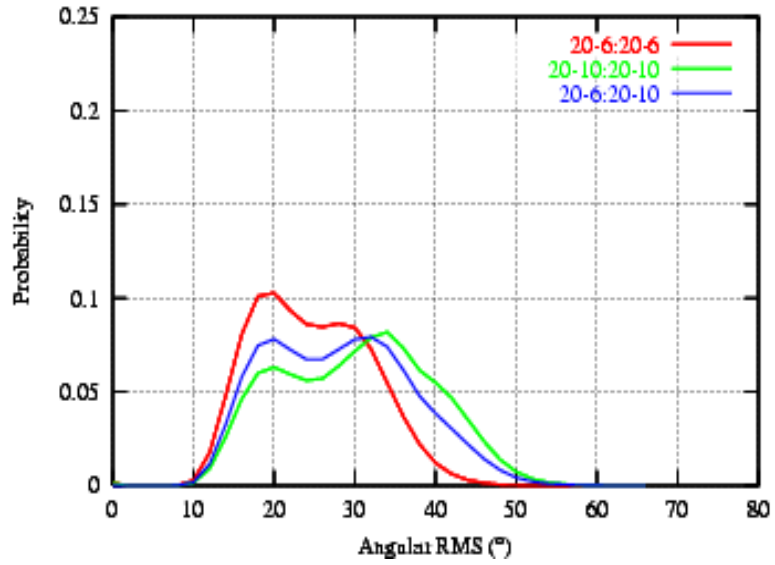

21: GGCT

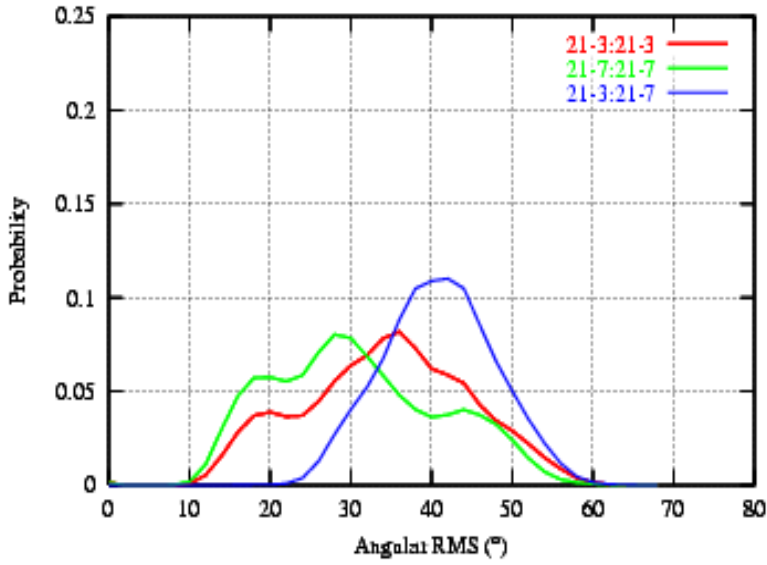

21: GCTG

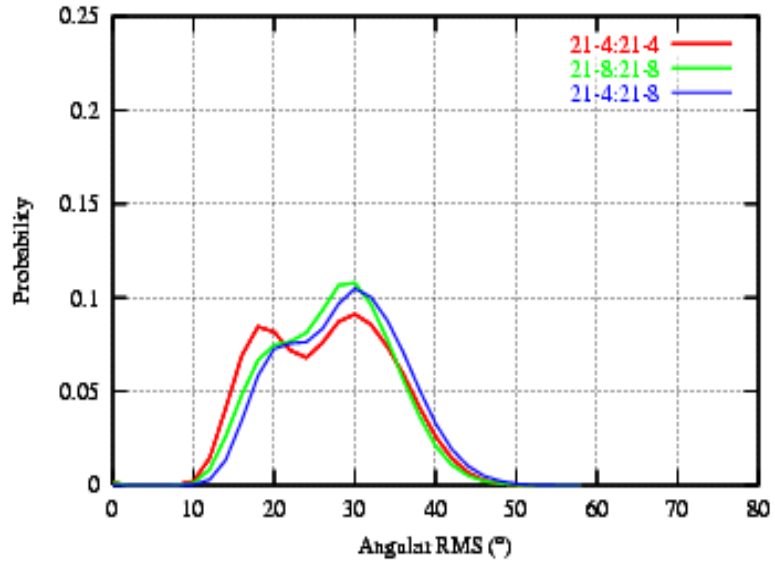

21: CTGG

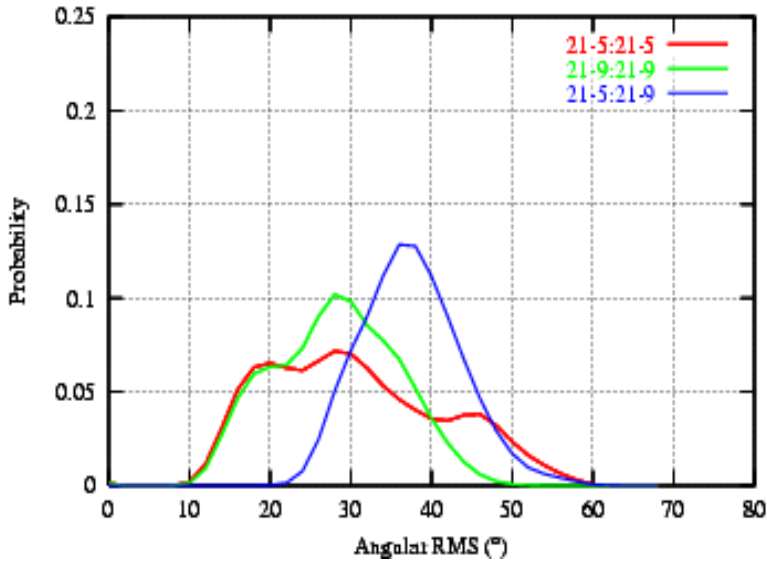

21: TGGC

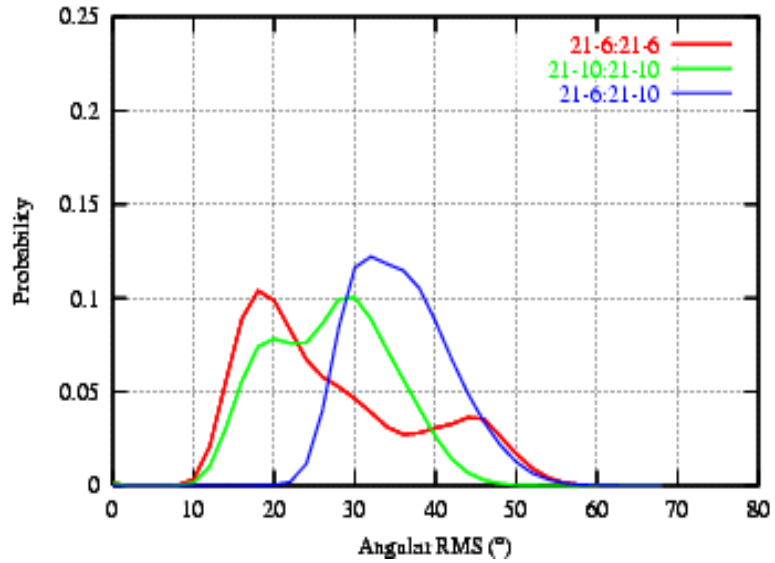

22: GCGT

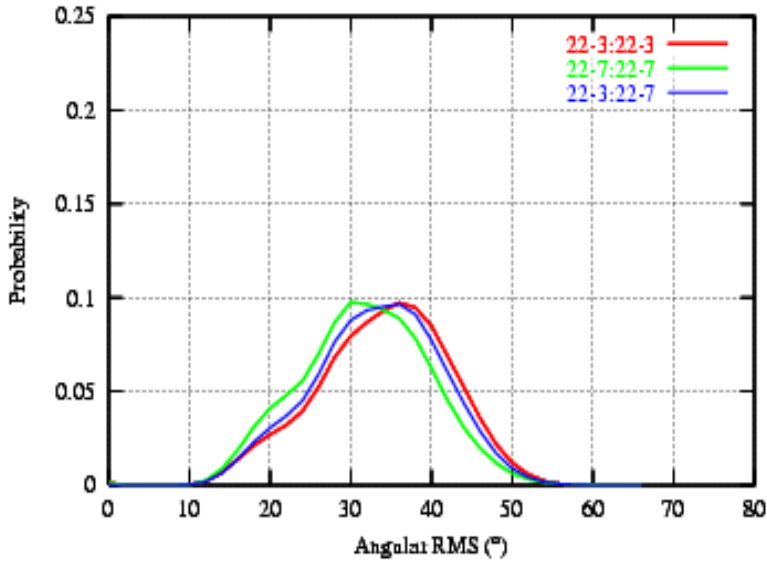

22: CGTG

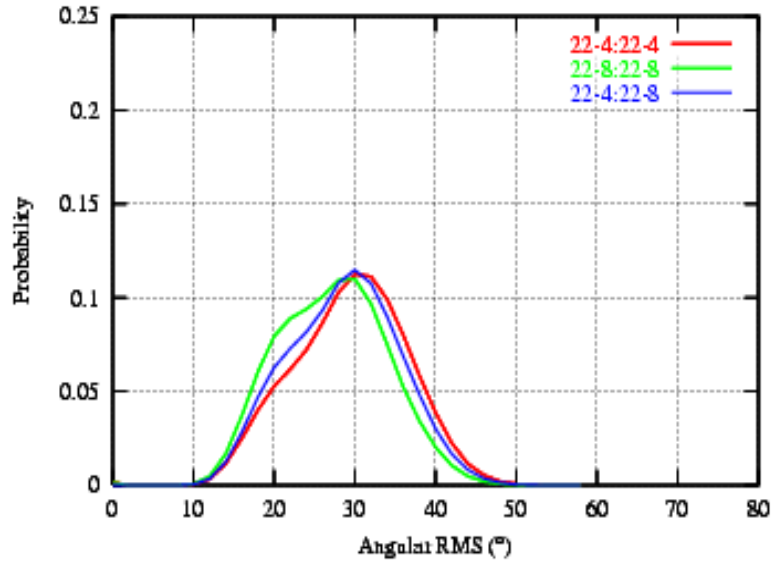

22: GTGC

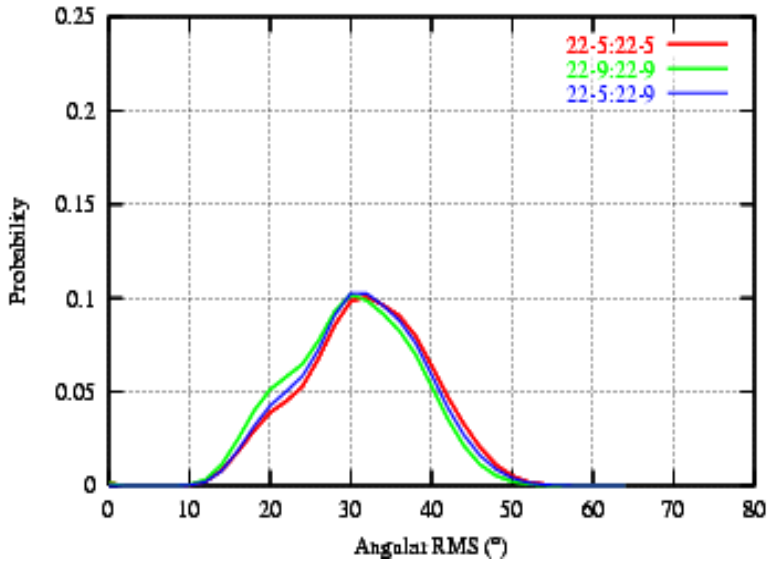

22: TGCG

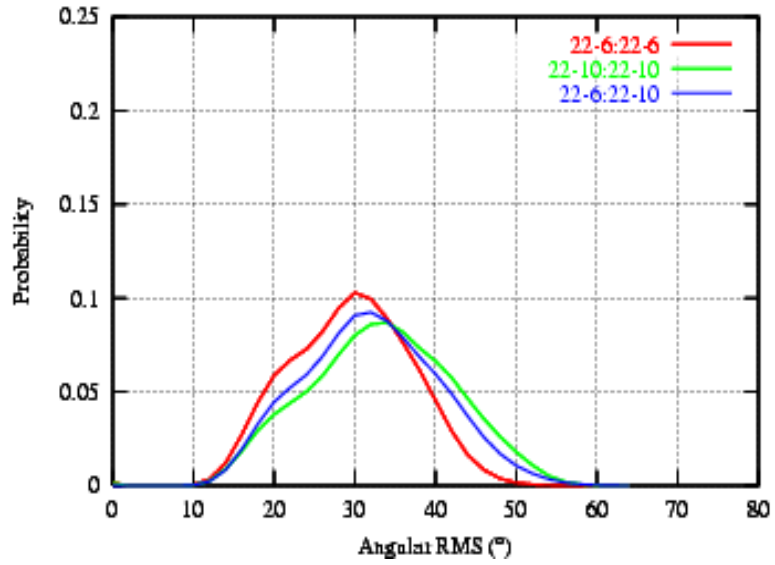

23: GAGA

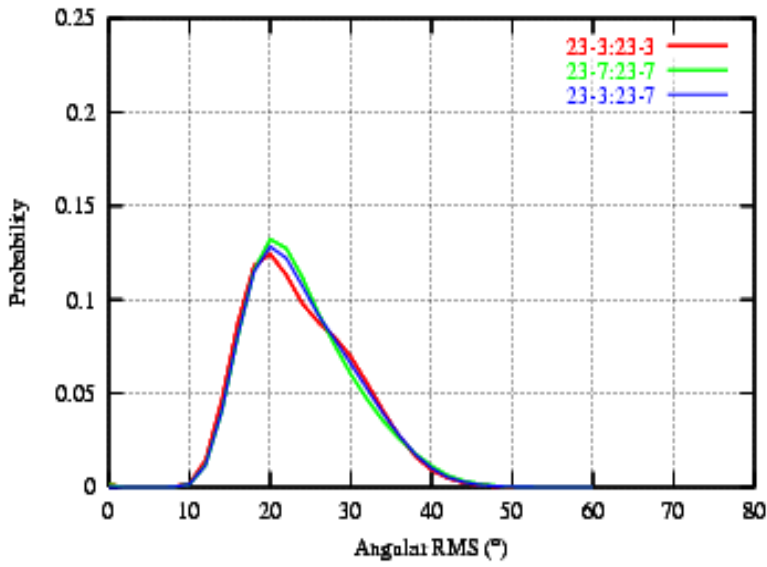

23: AGAG

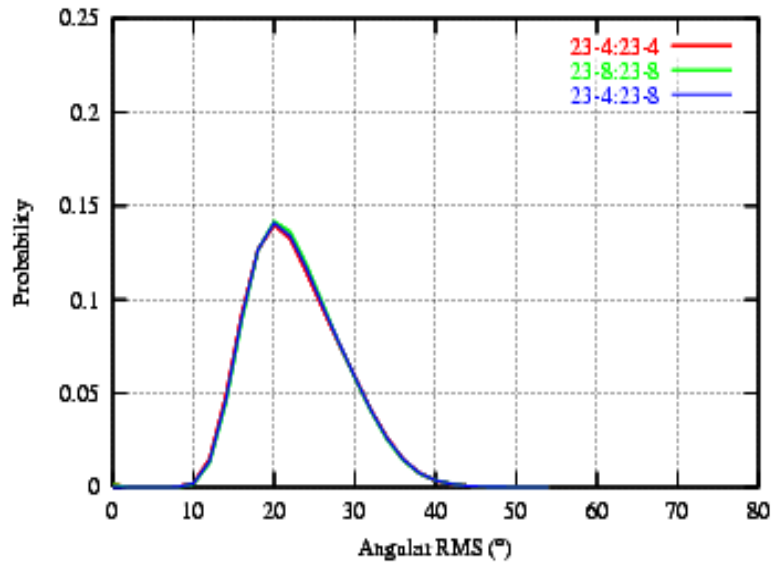

23: GAGA

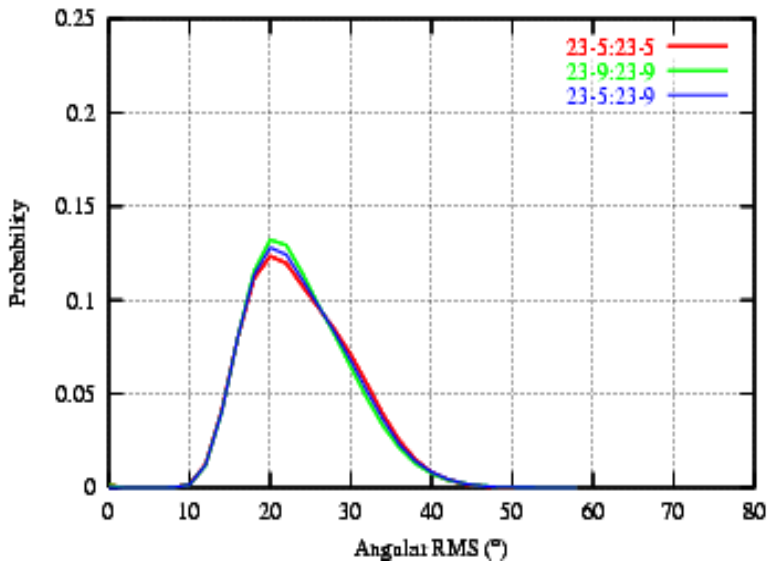

23: AGAG

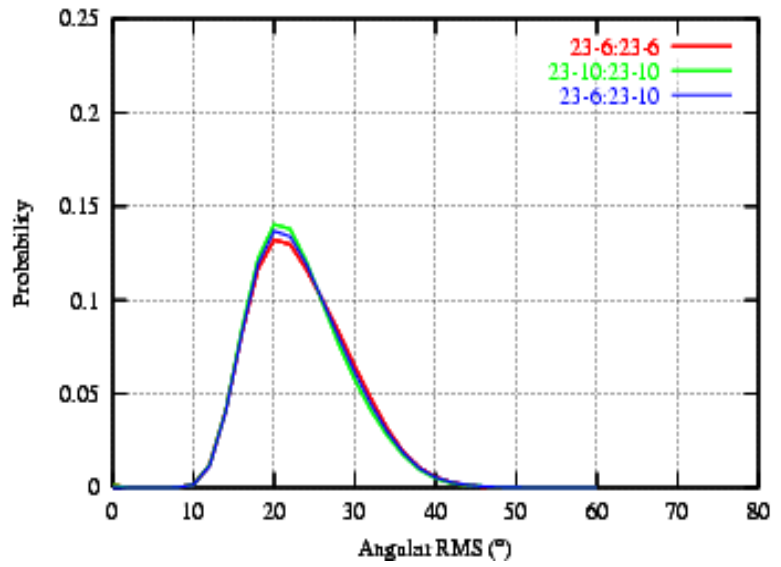

24: GGAA

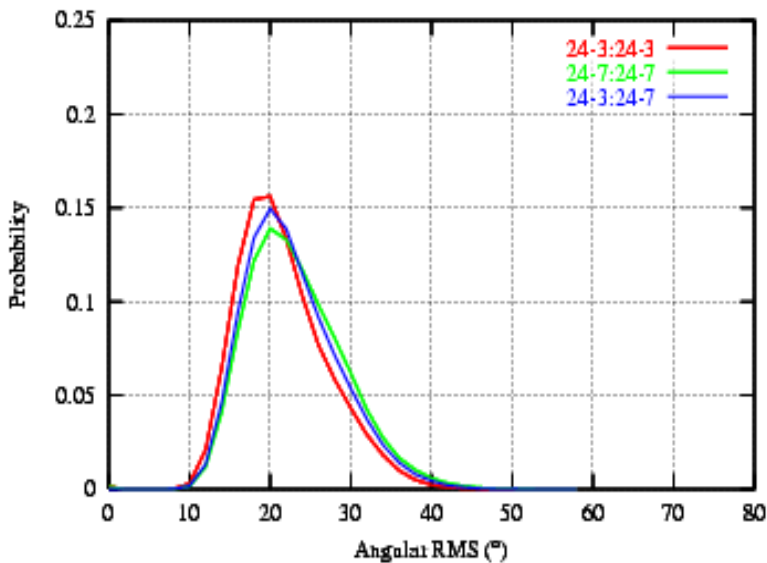

24: GAAG

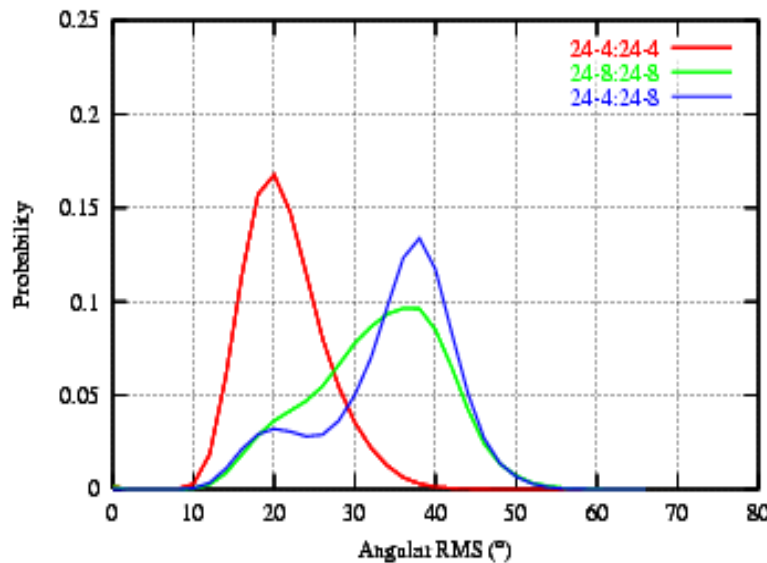

24: AAGG

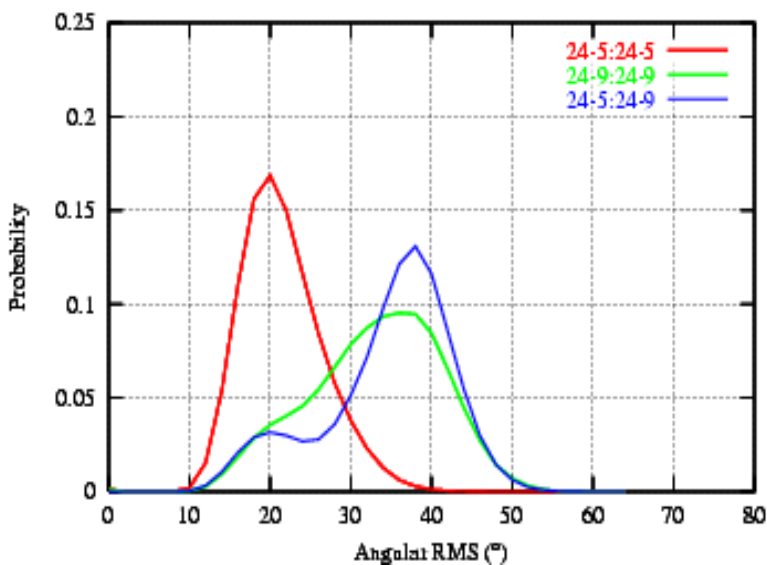

24: AGGA

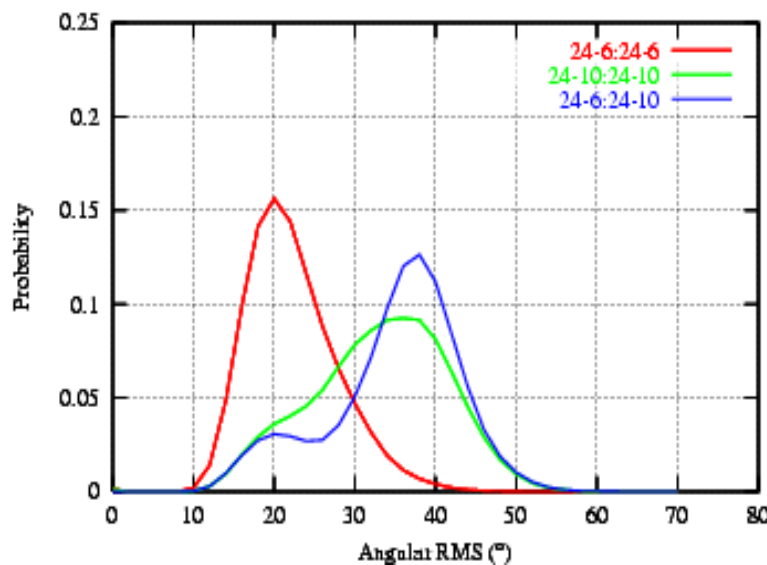

25: AAGC

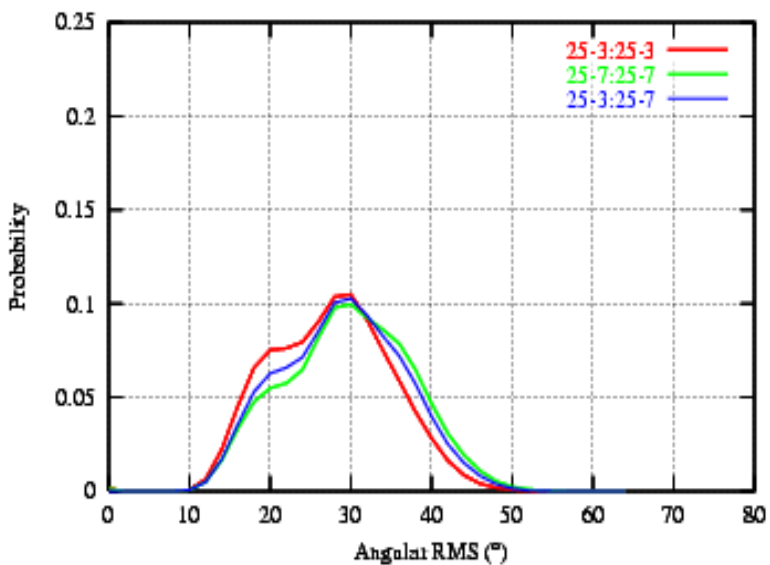

25: AGCA

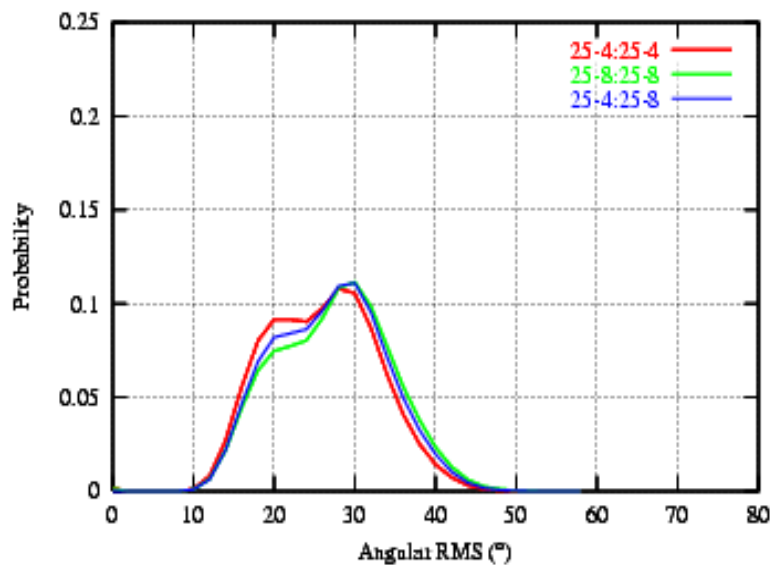

25: GCAA

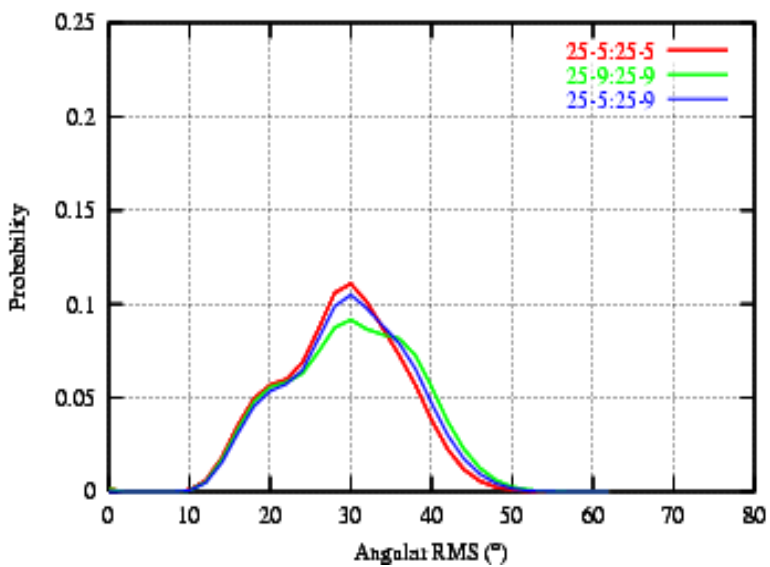

25: CAAG

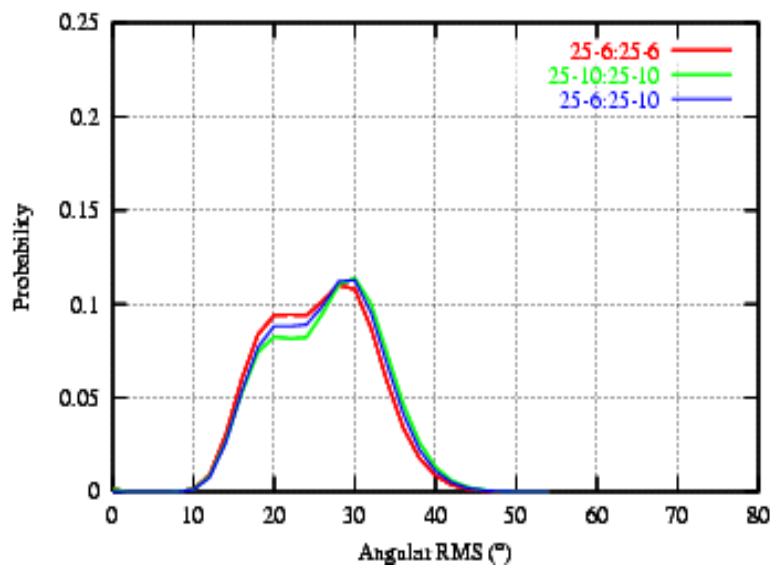

26: AGAT

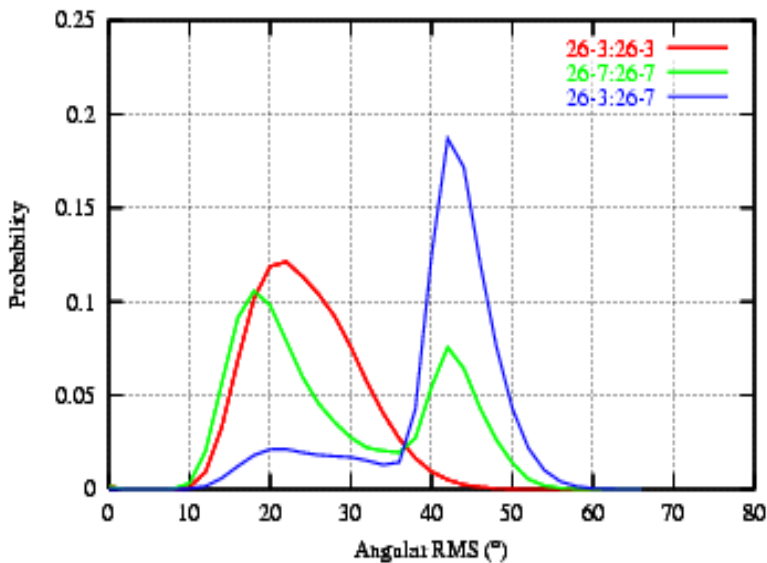

26: GATA

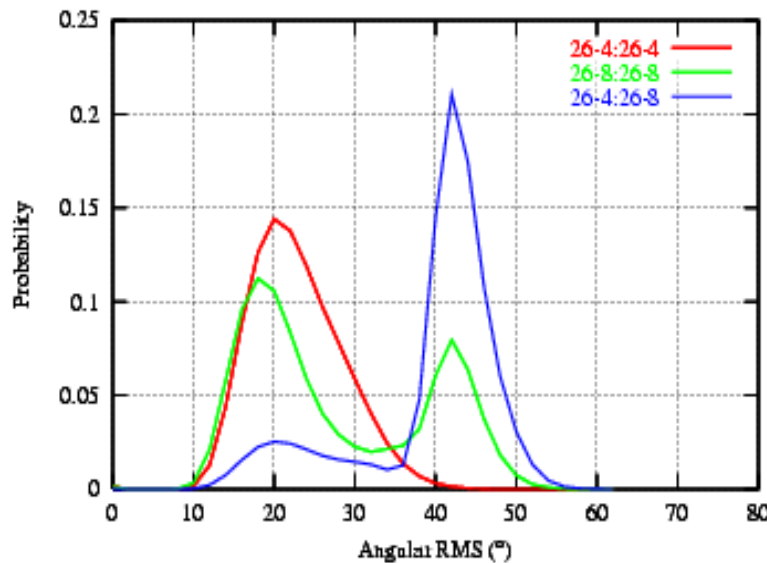

26: ATAG

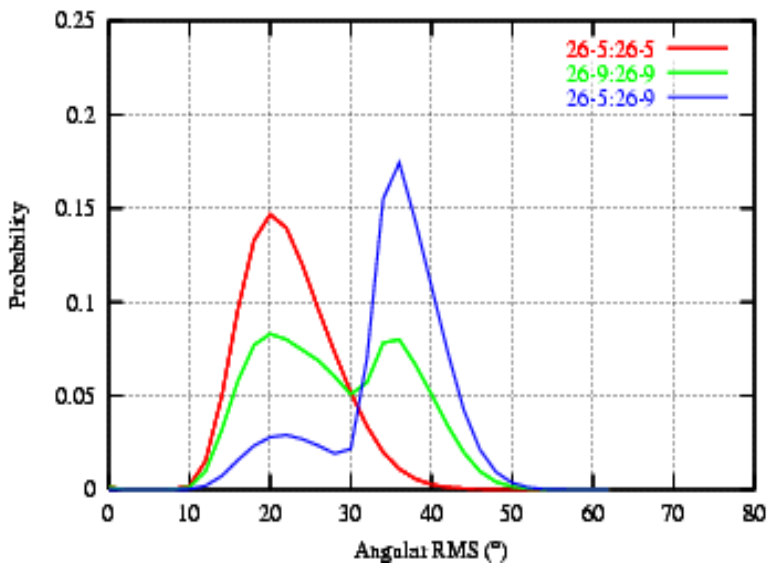

26: TAGA

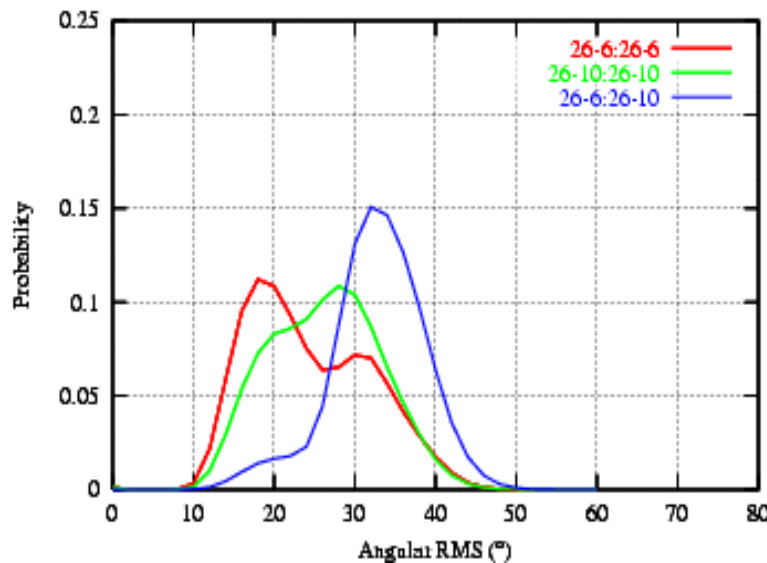

27: GTGT

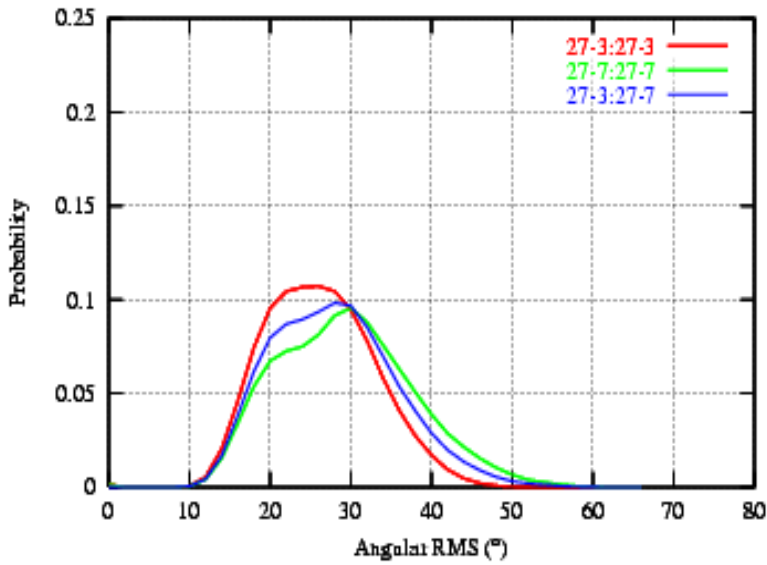

27: TGTG

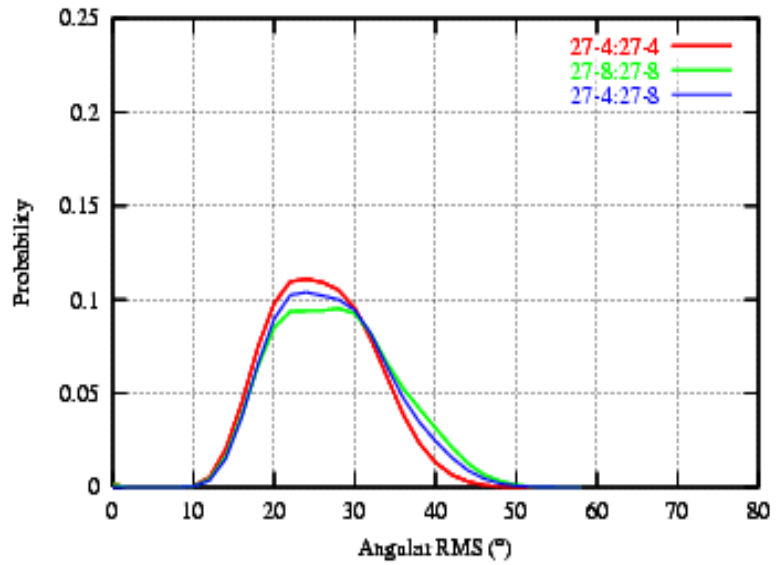

27: GTGT

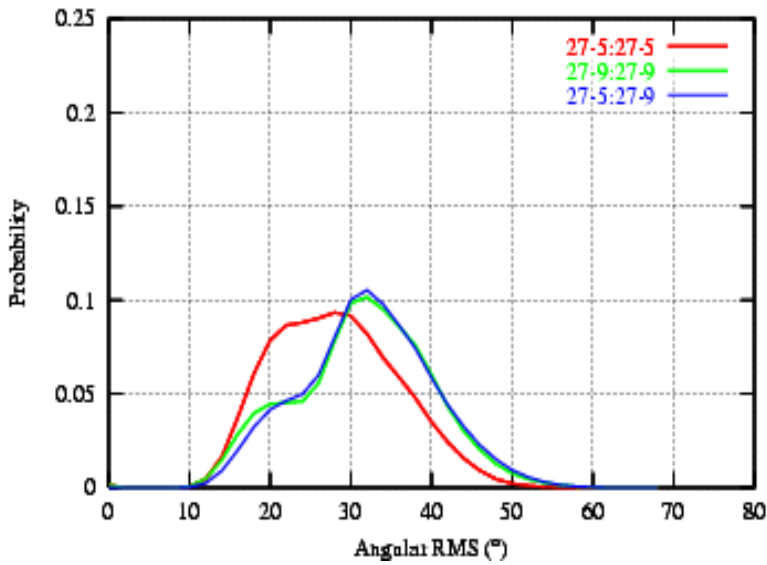

27: TGTG

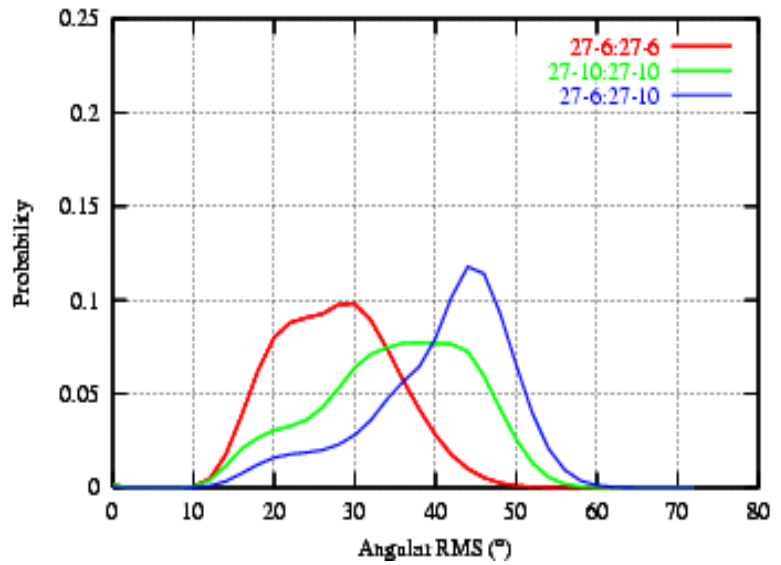



28: GGTT

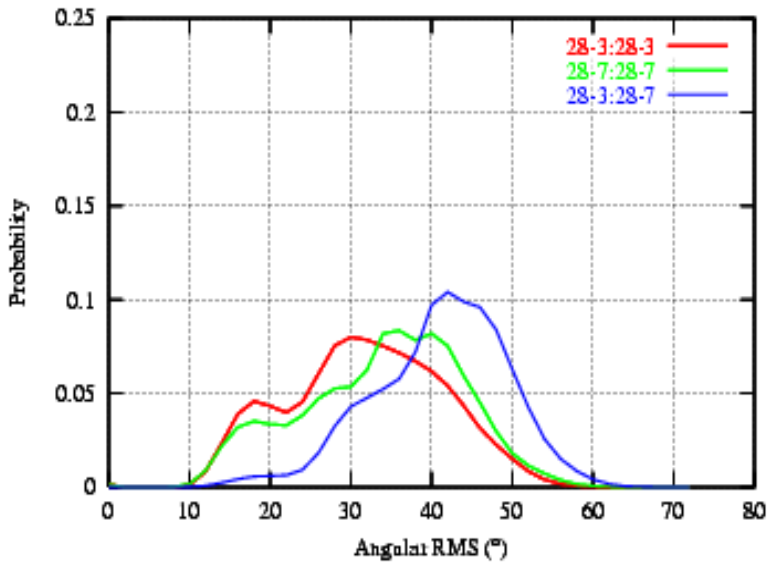

28: GTTG

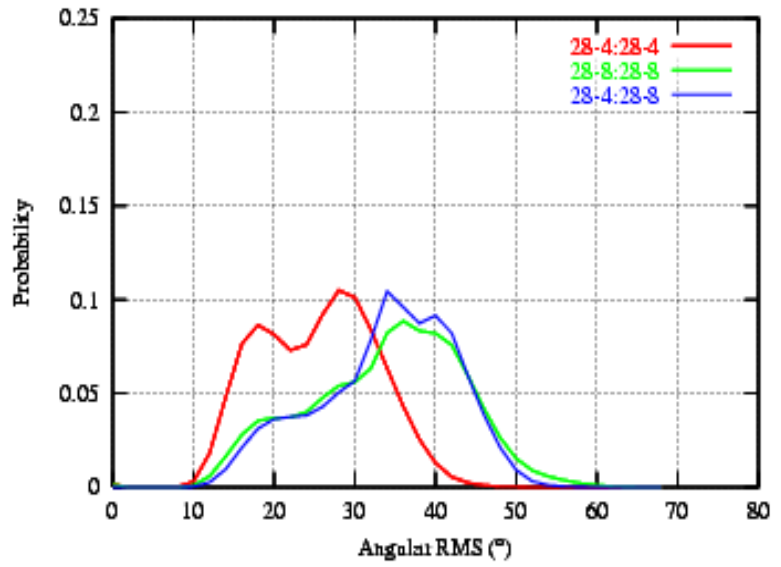

28: TTGG

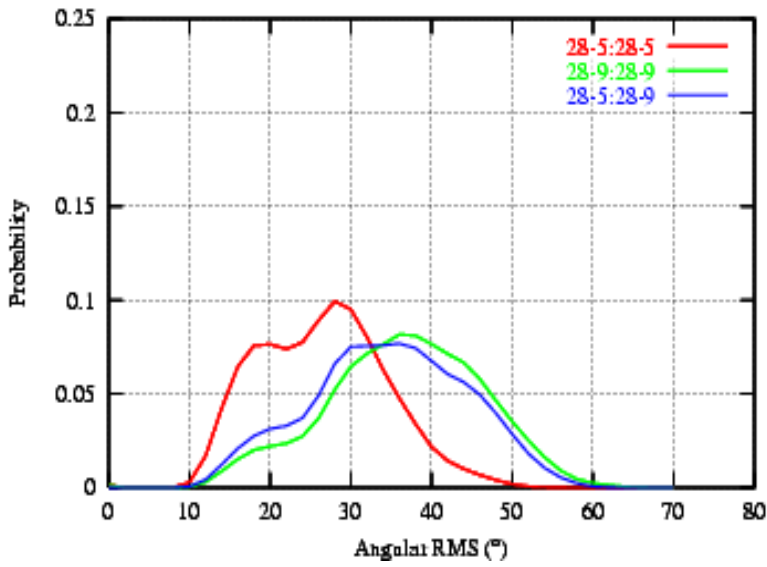

28: TGGT

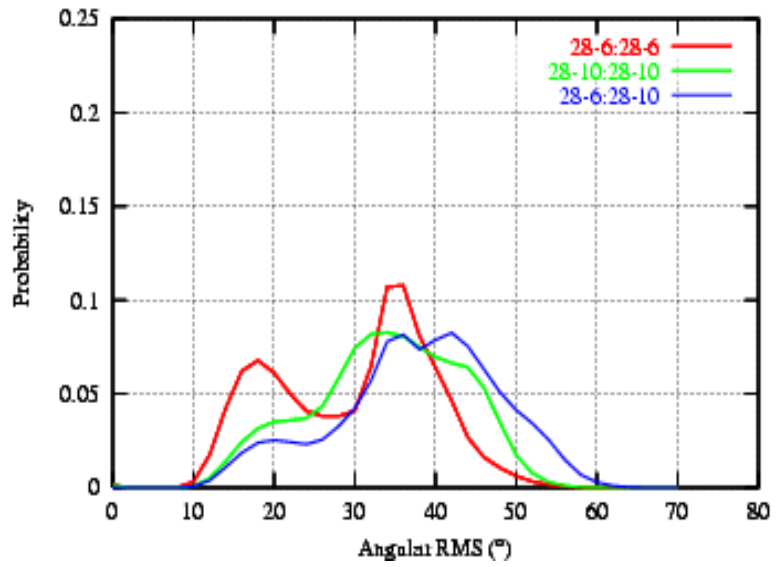

29: AACG

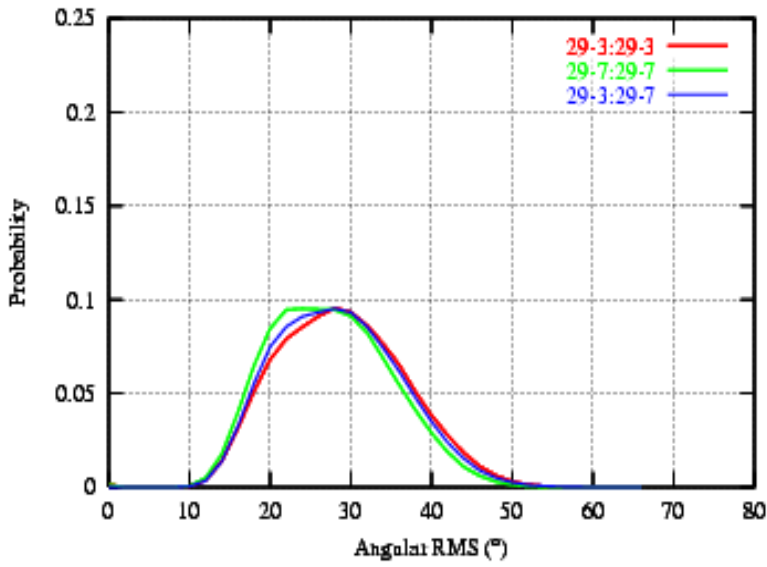

29: ACGA

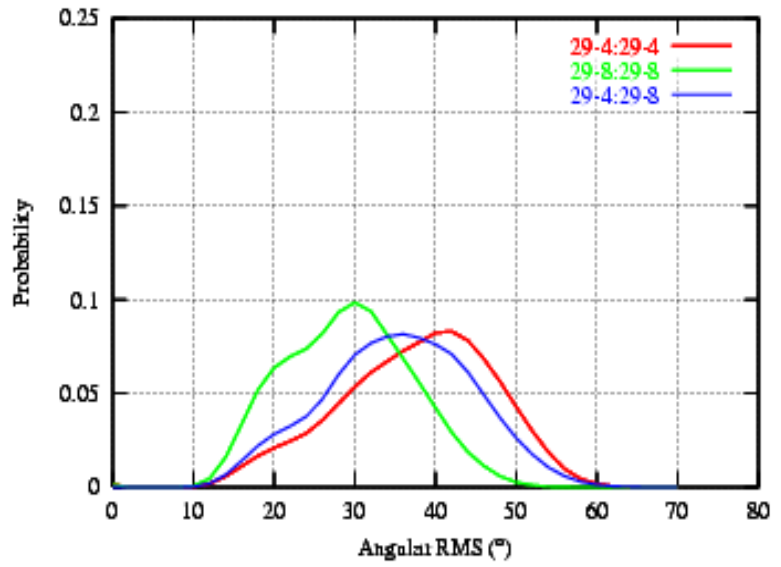

29: CGAA

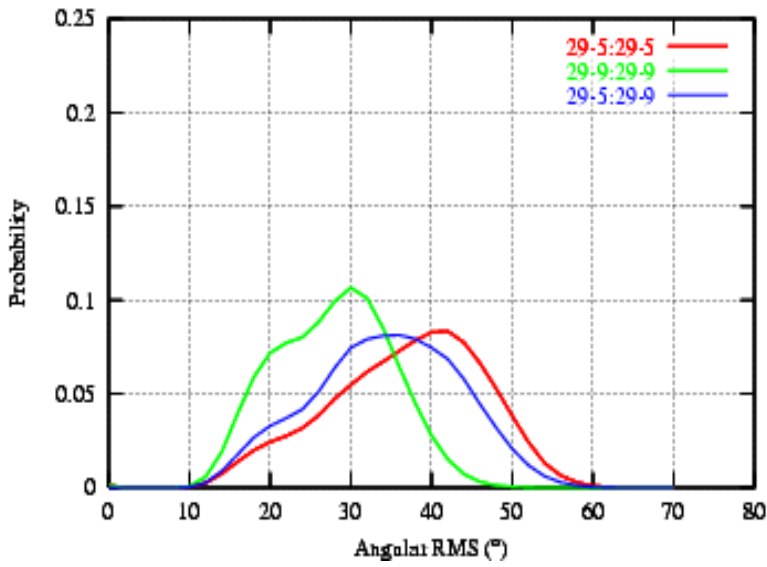

29: GAAC

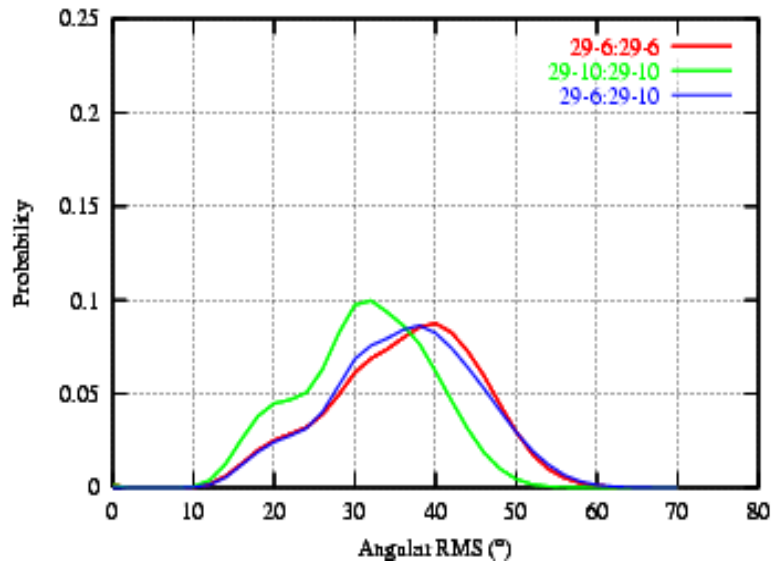

30: ACAG

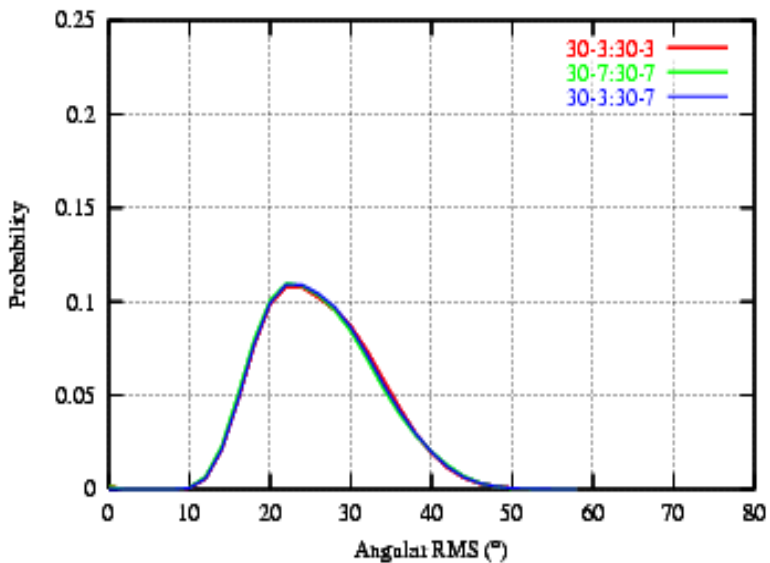

30: CAGA

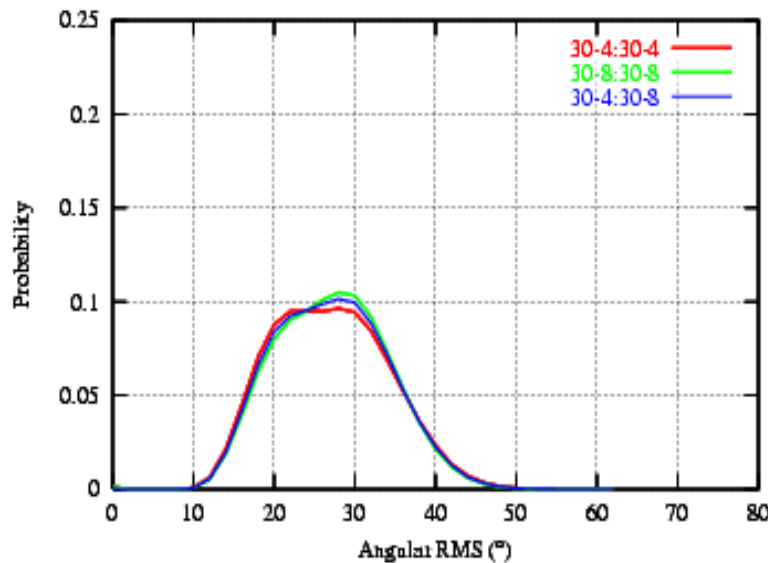

30: AGAC

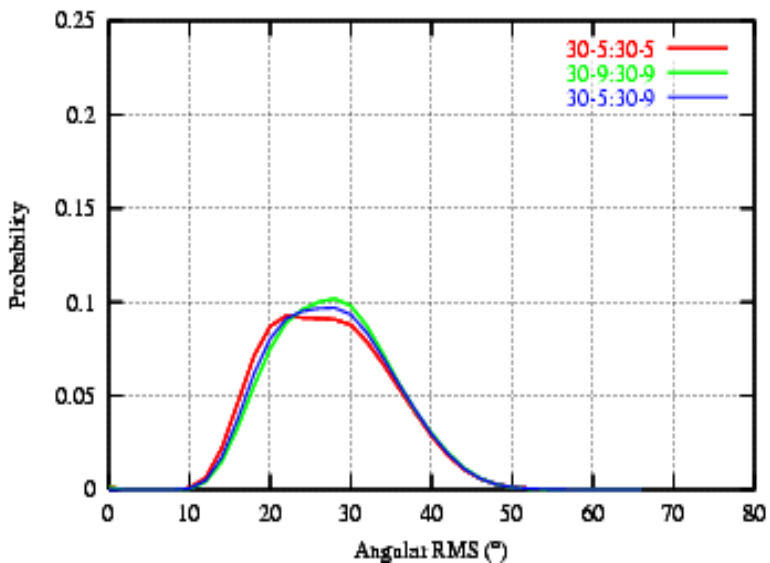

30: GACA

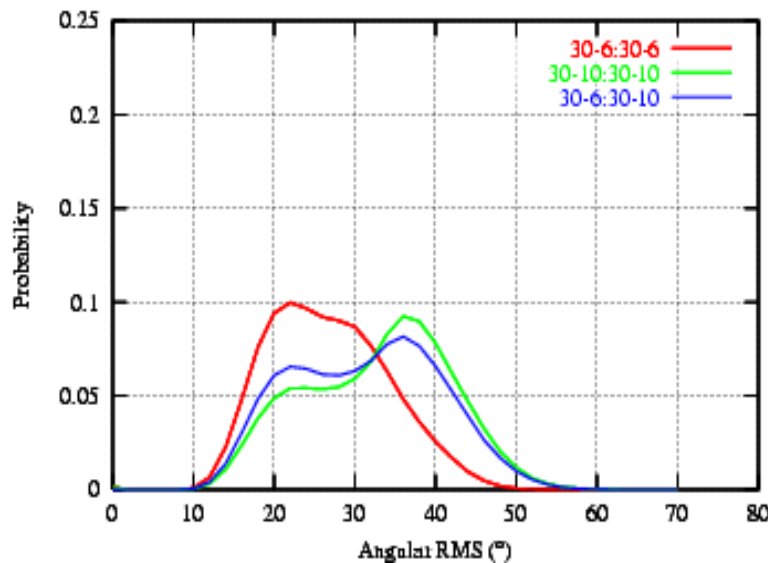

31: GGGA

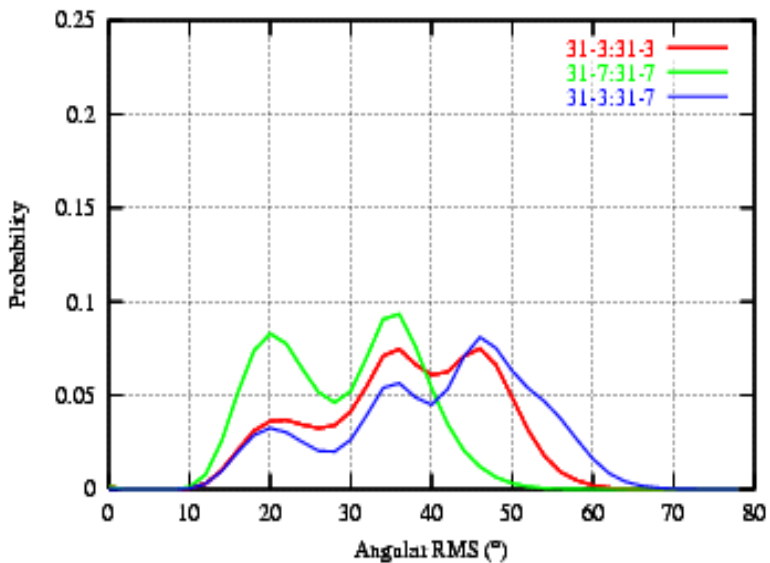

31: GGAG

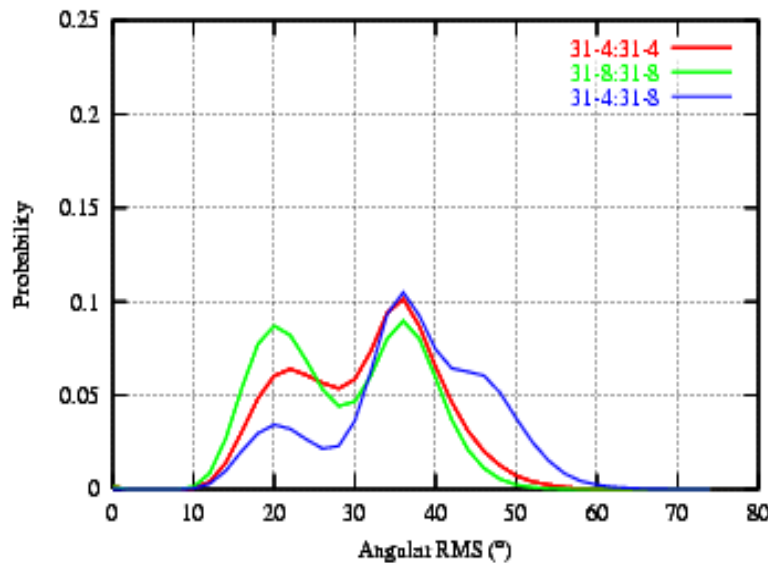

31: GAGG

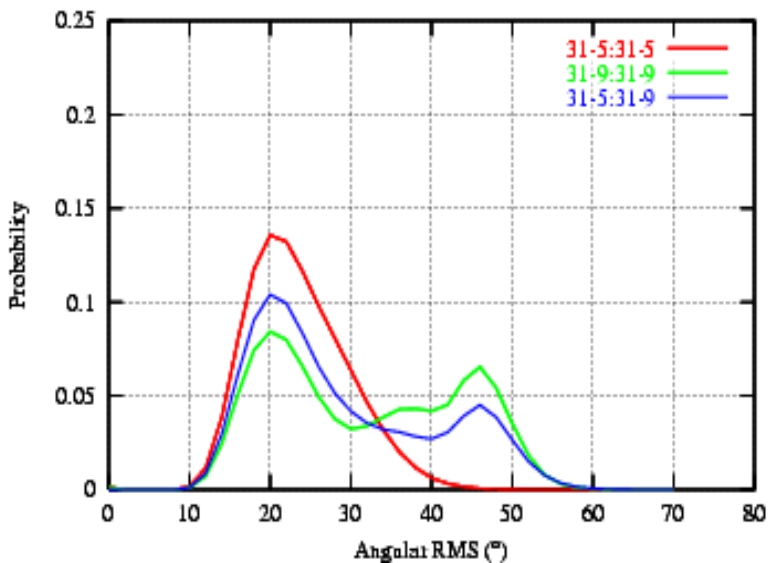

31: AGGG

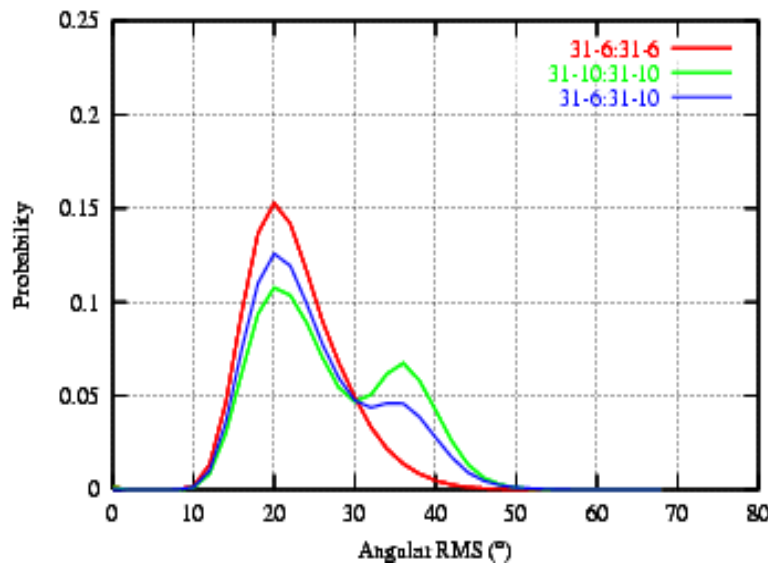

32: AATT

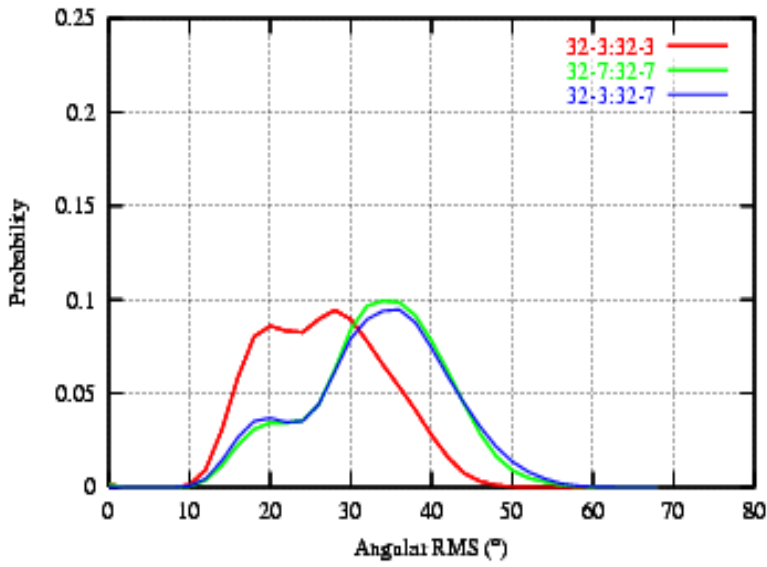

32: ATTA

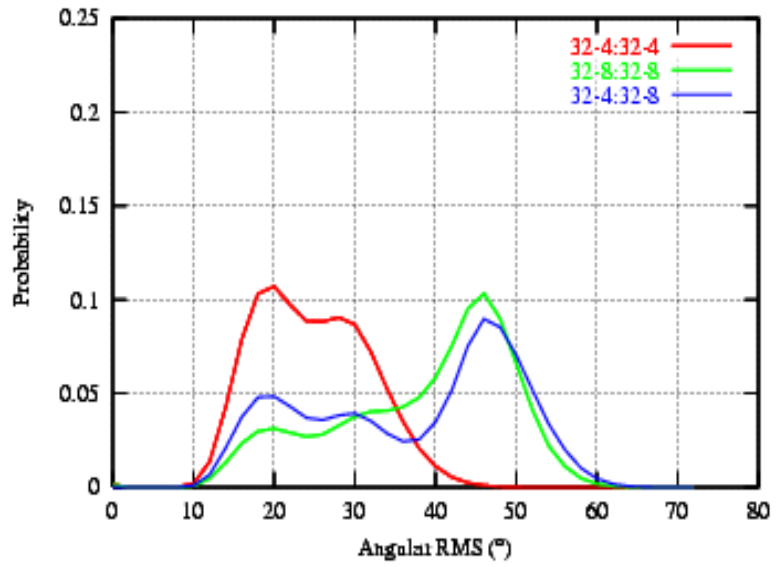

32: TTAA

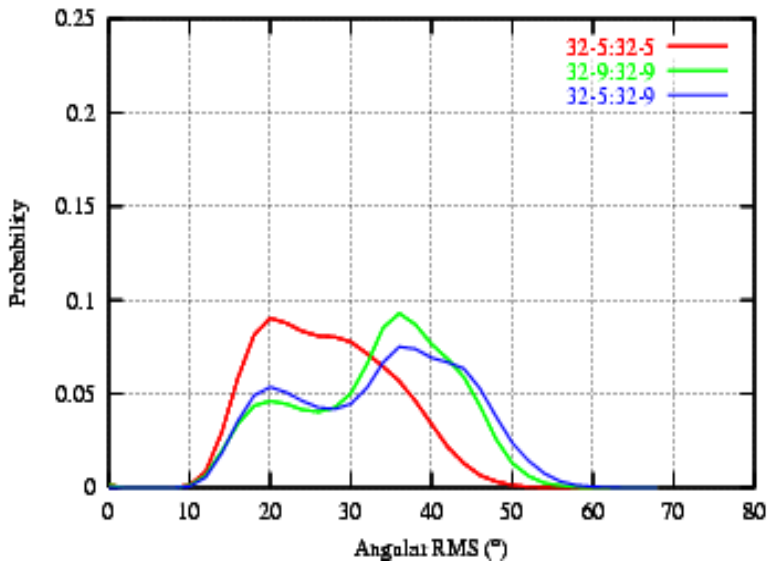

32: TAAT

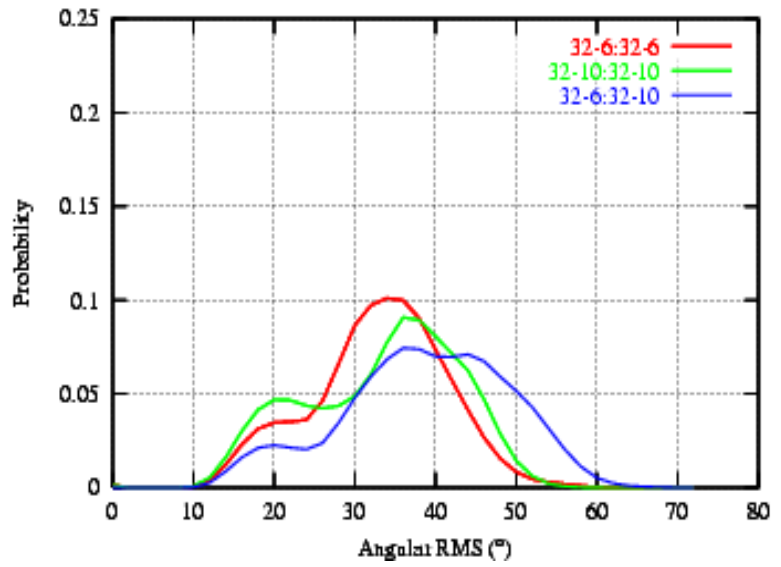

33: AACT

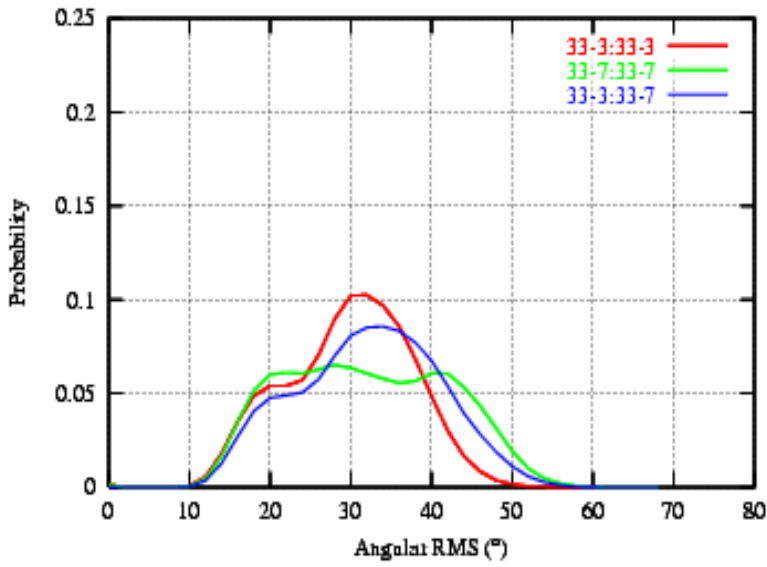

33: ACTA

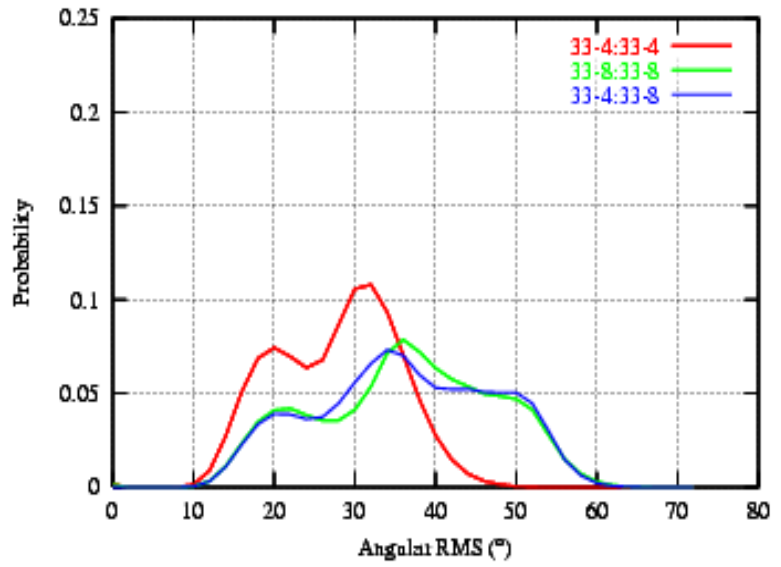

33: CTAA

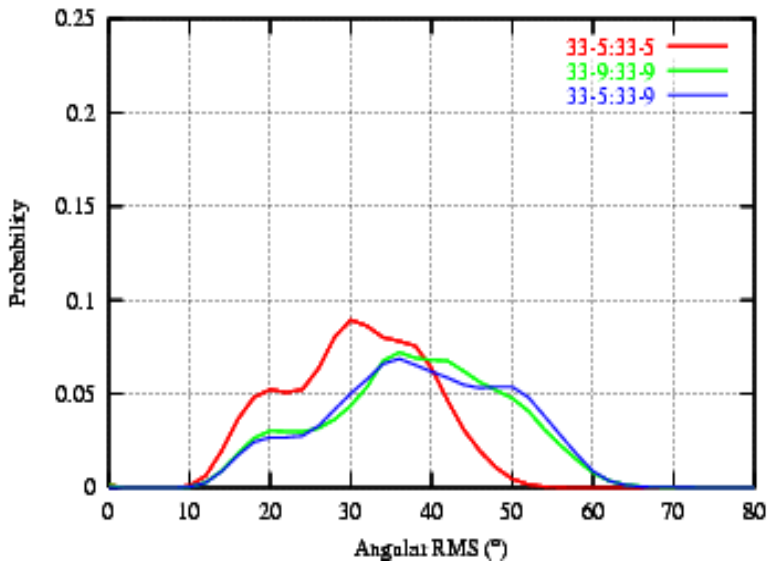

33: TAAC

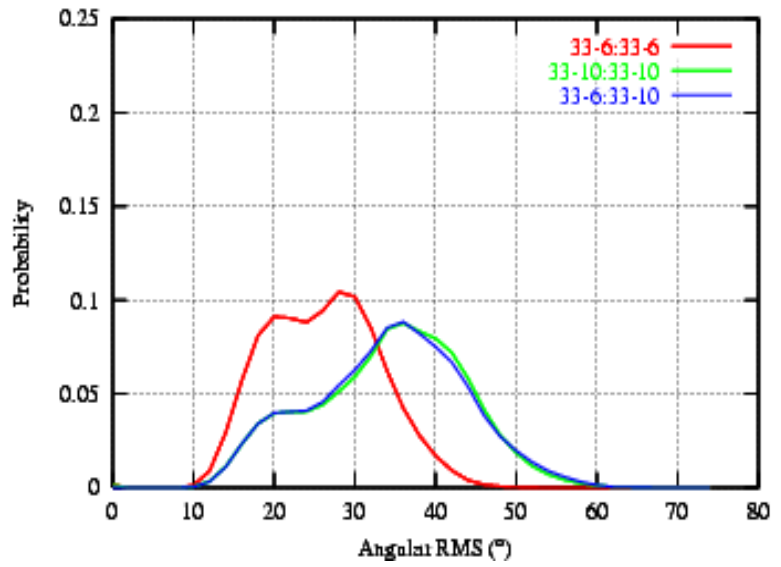

34: ACAT

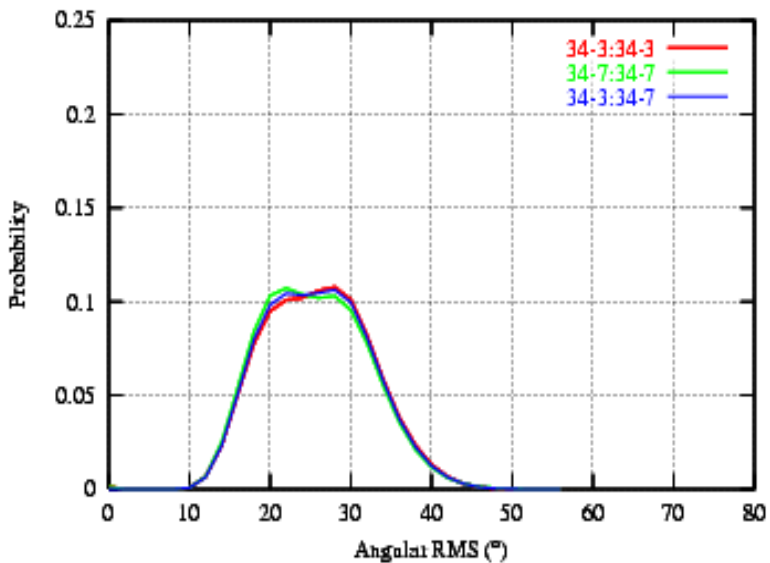

34: CATA

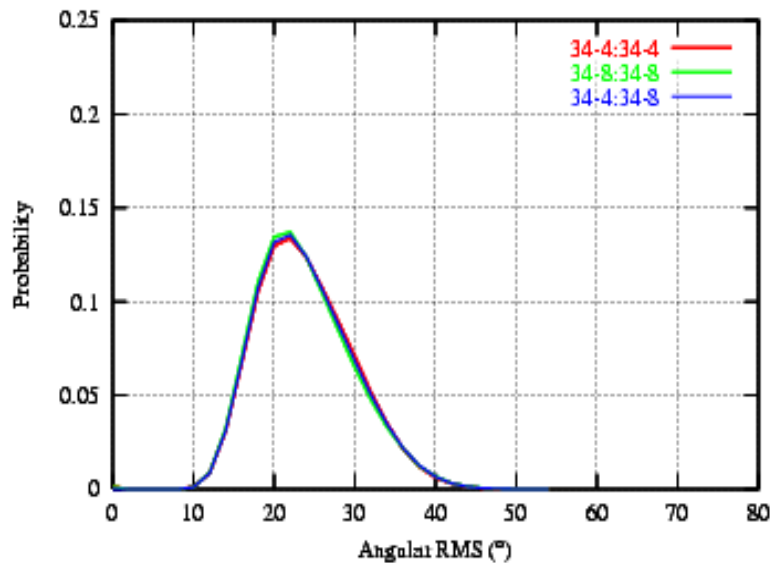

34: ATAC

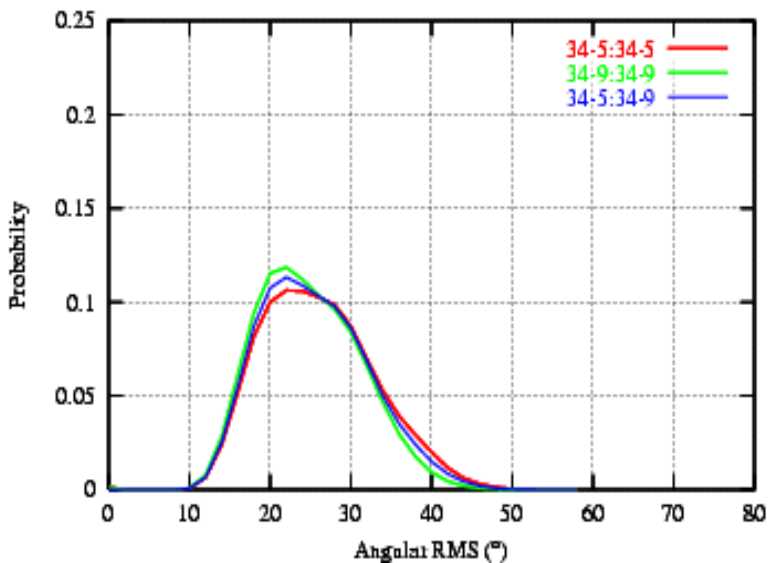

34: TACA

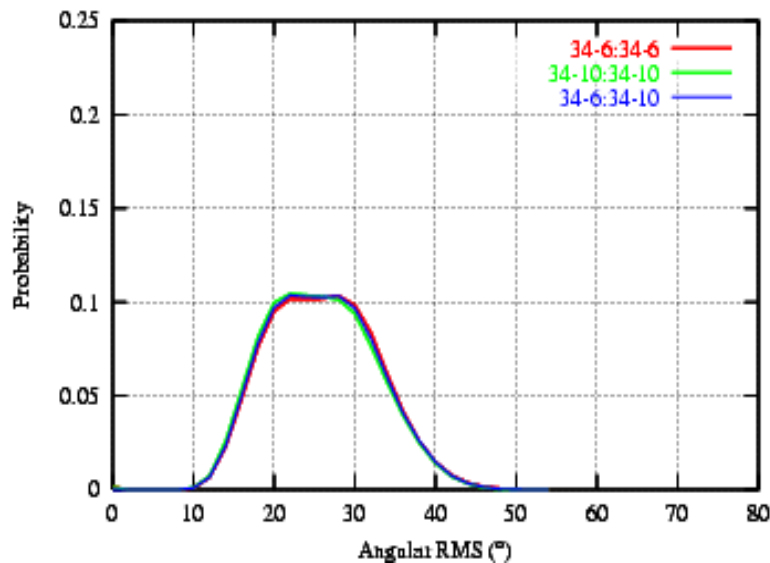

35: GGGC

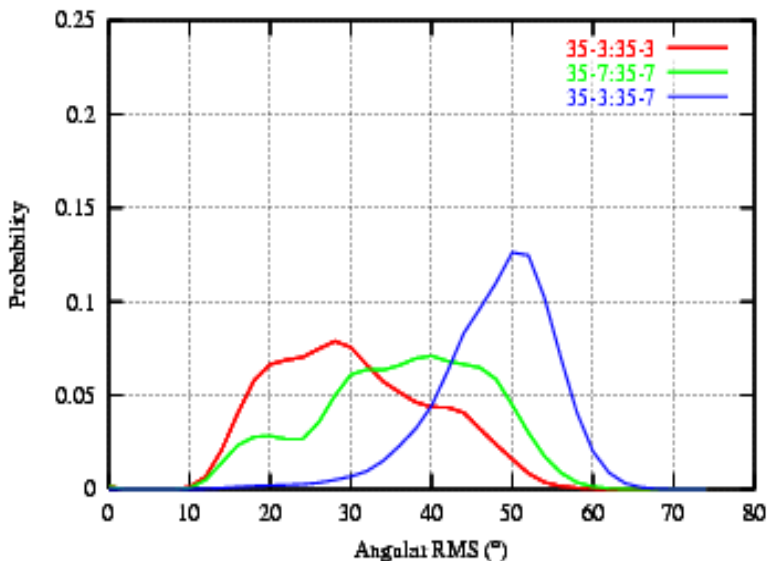

35: GGGC

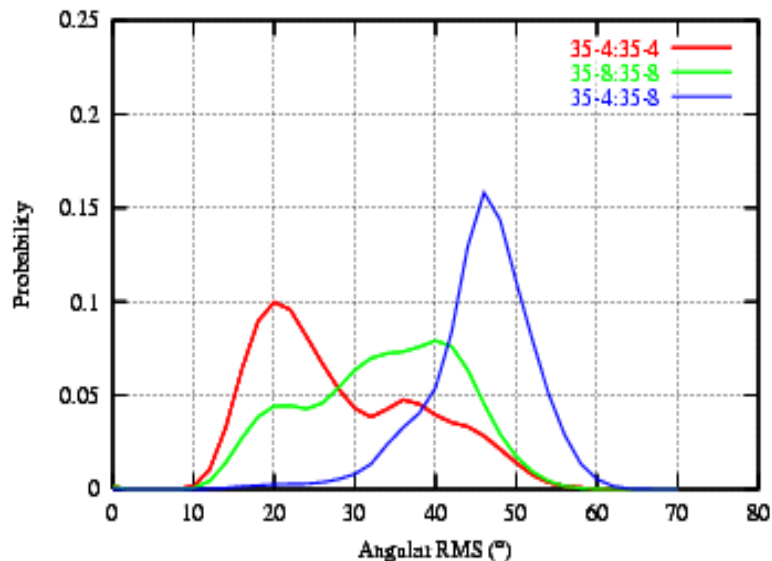

35: GCGG

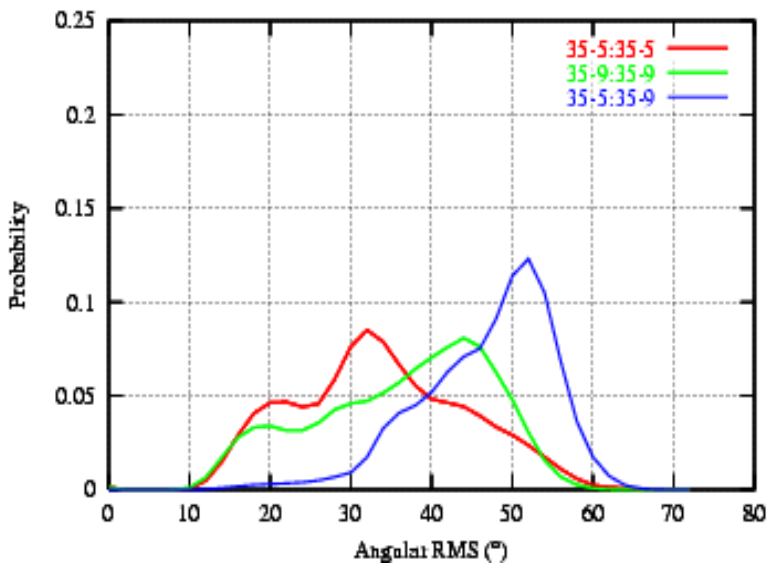

35: CGGG

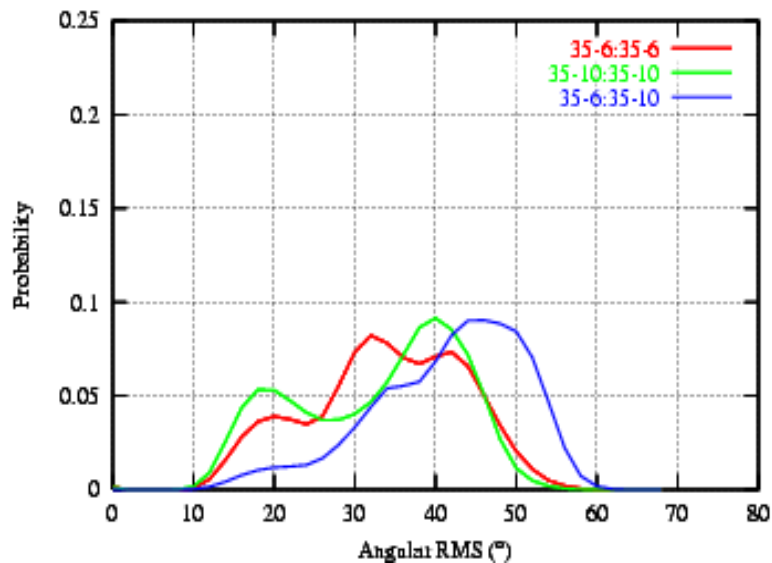



36: GGAC

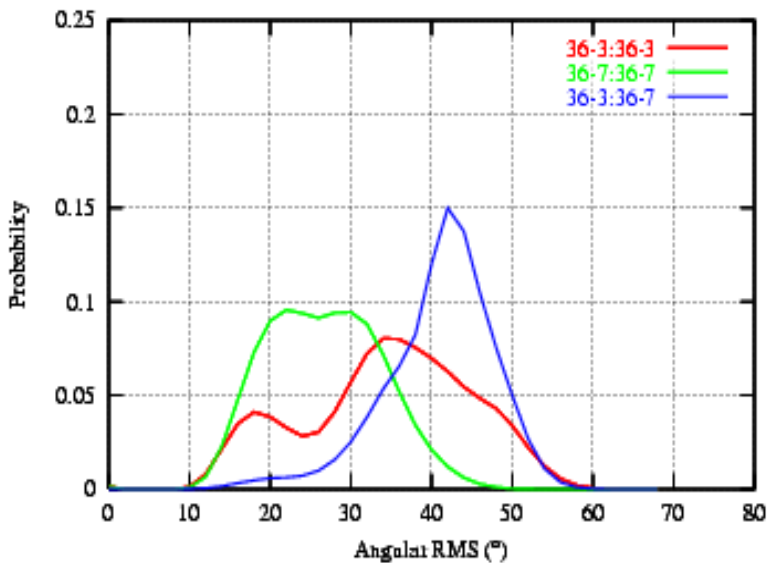

36: GACG

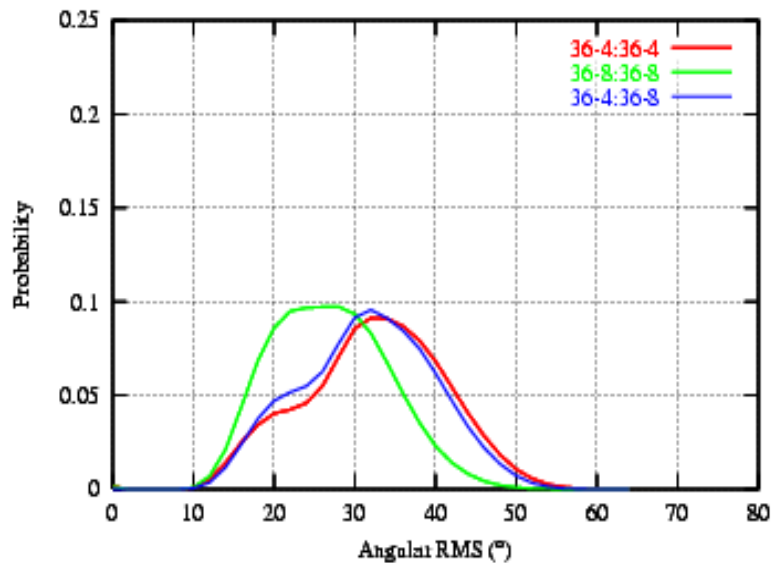

36: ACGG

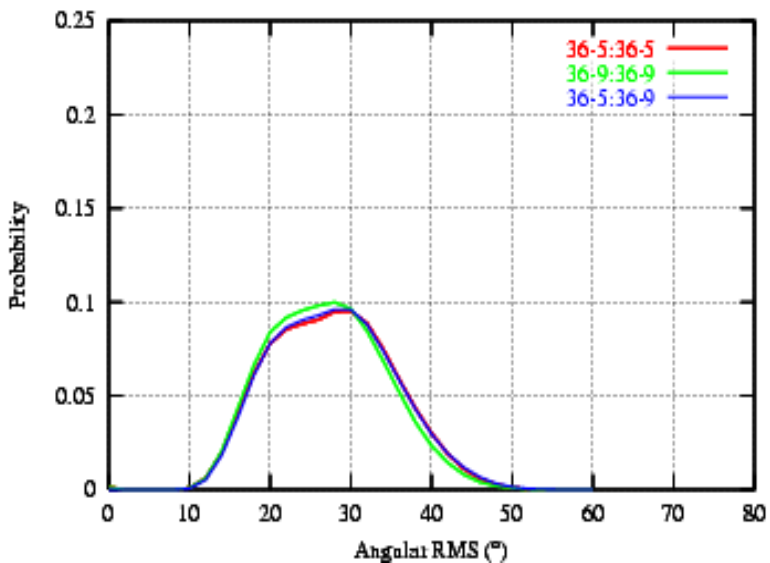

36: CGGA

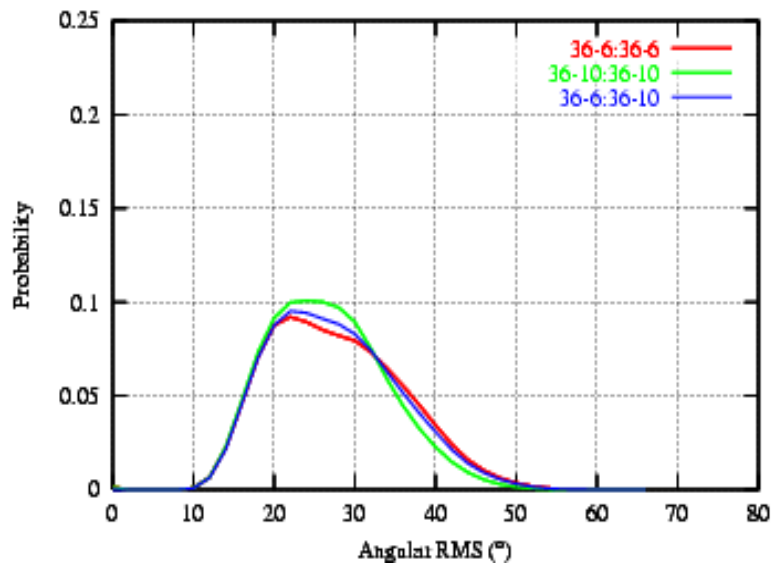

37: AATC

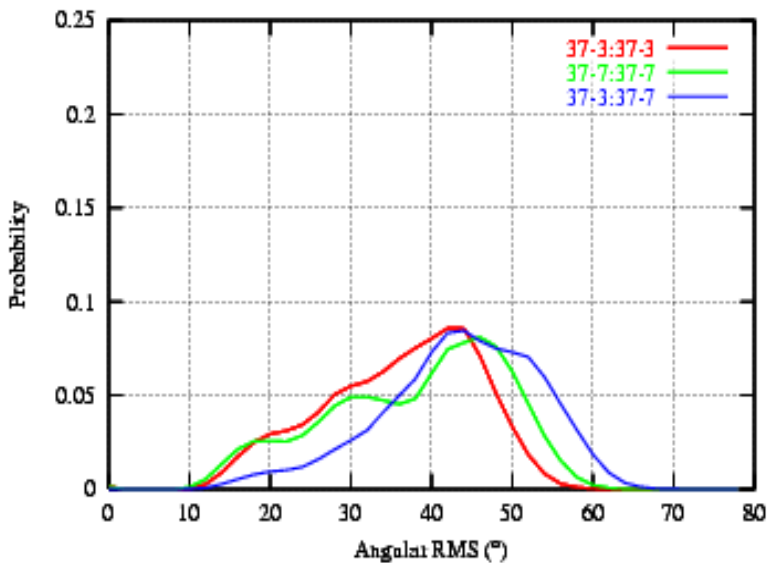

37: ATCA

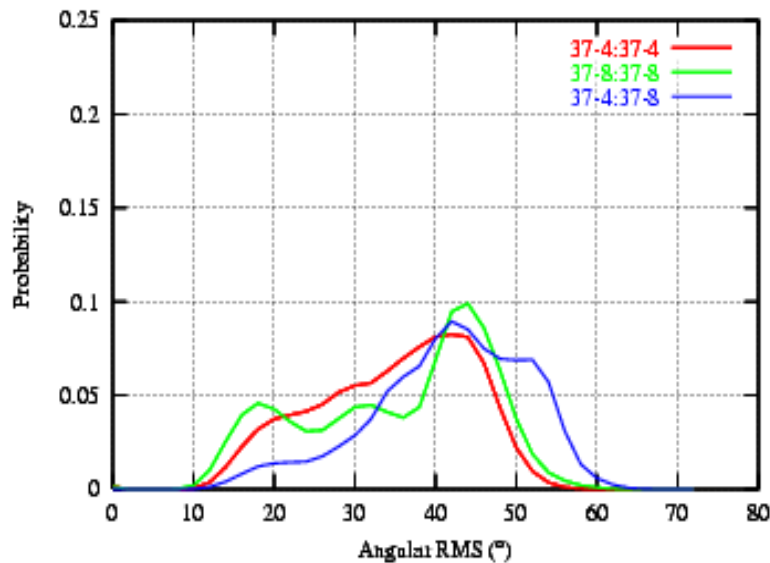

37: TCAA

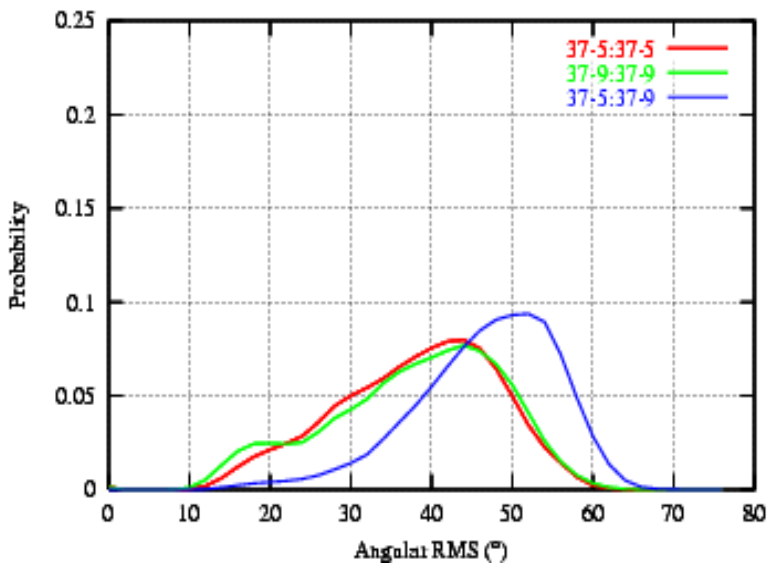

37: CAAT

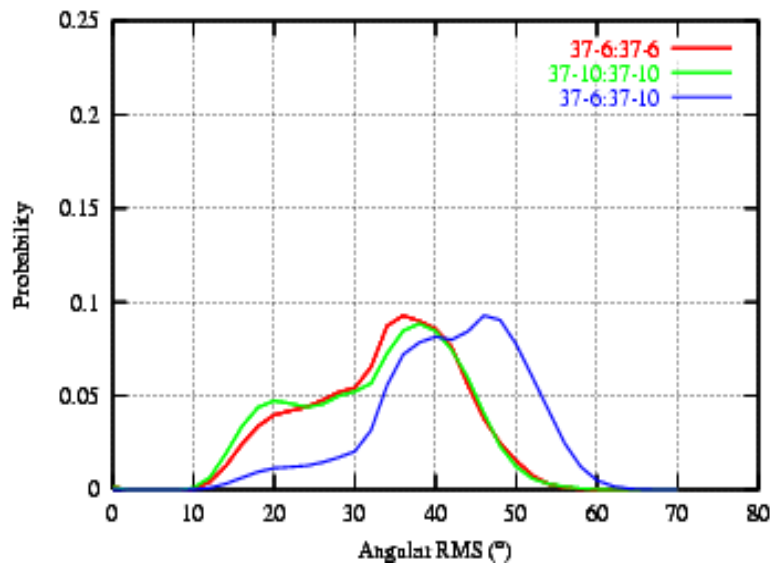

38: GCTA

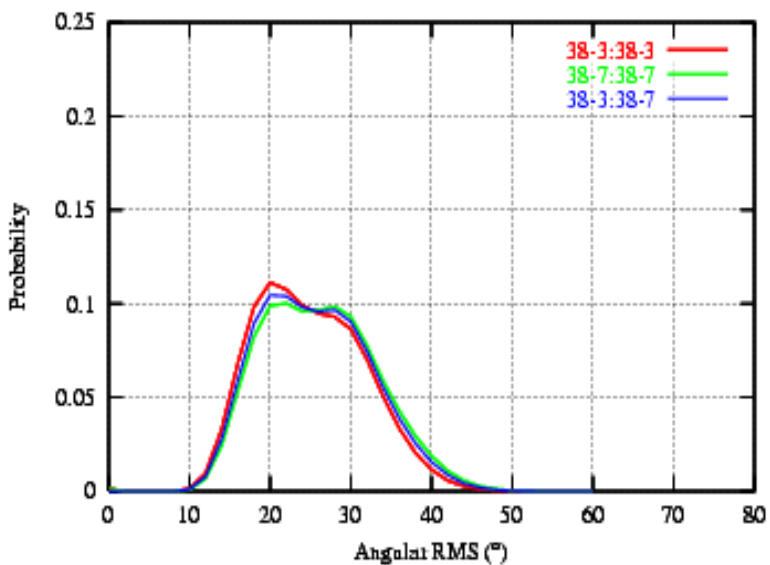

38: CTAG

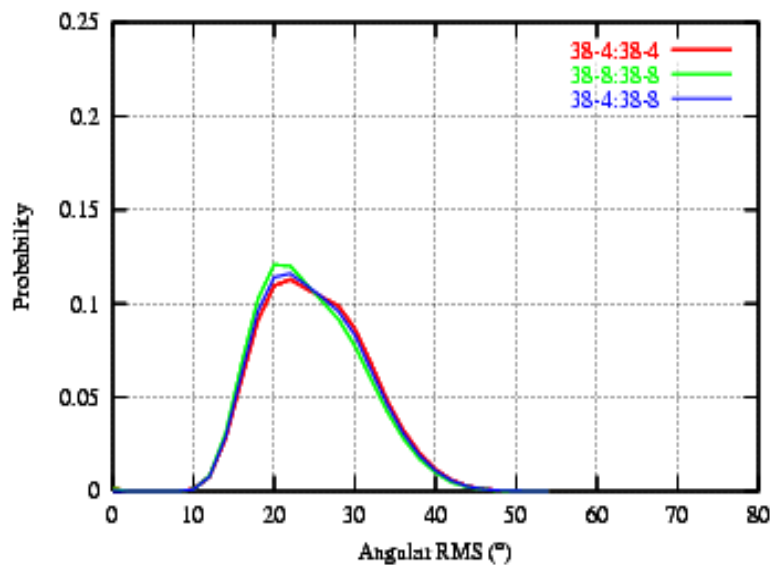

38: TAGC

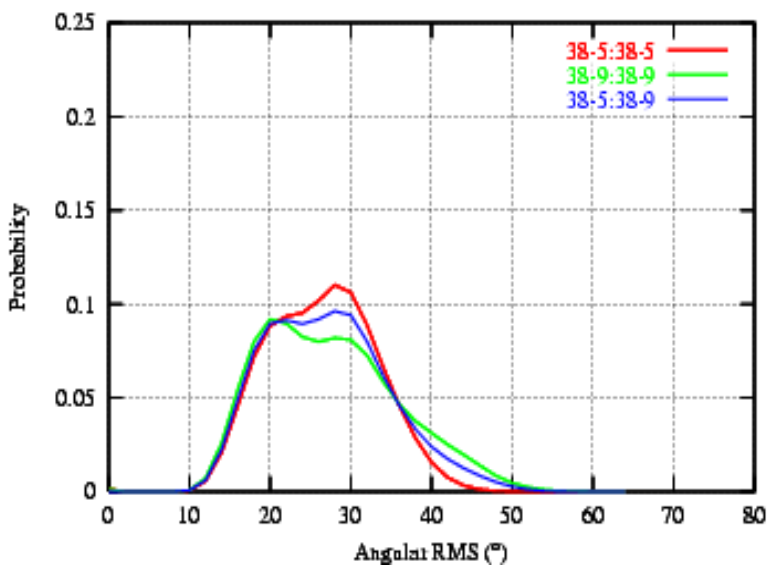

38: AGCT

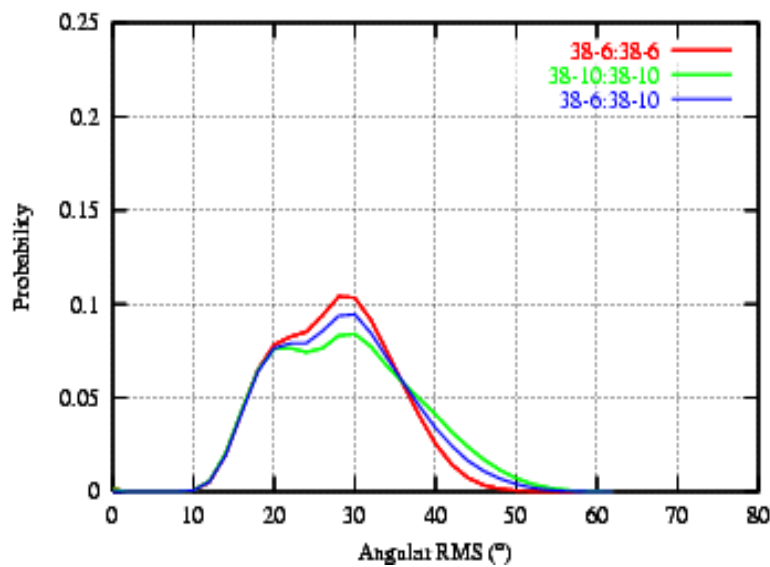

39: GGGT

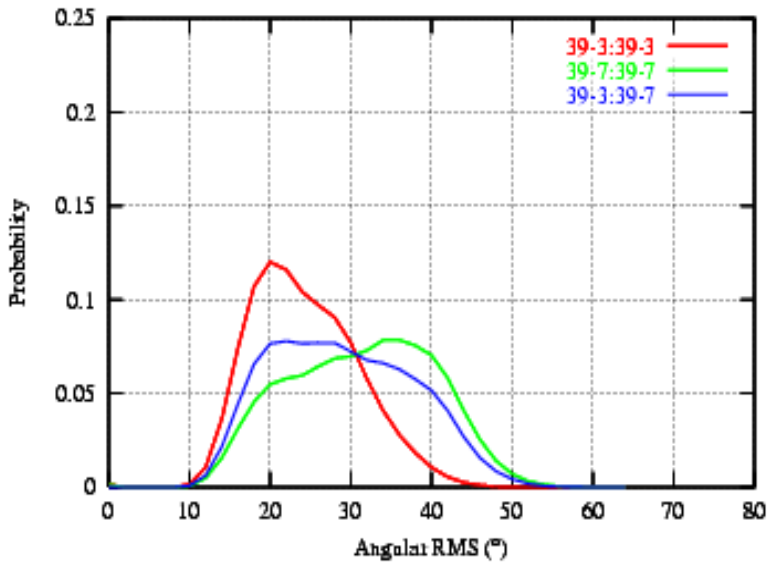

39: GGTG

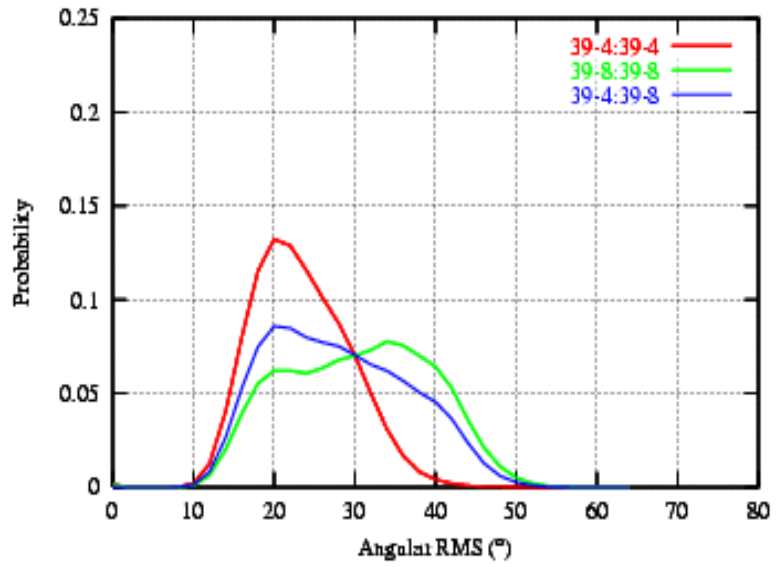

39: GTGG

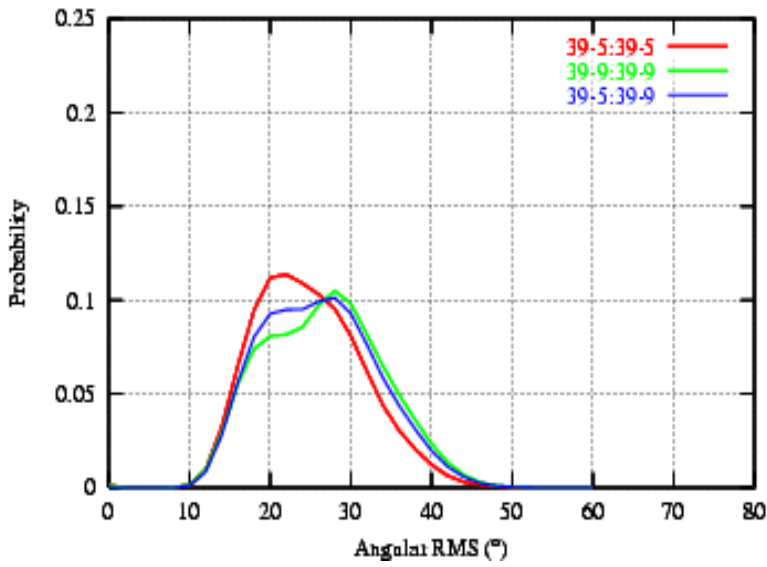

39: TGGG

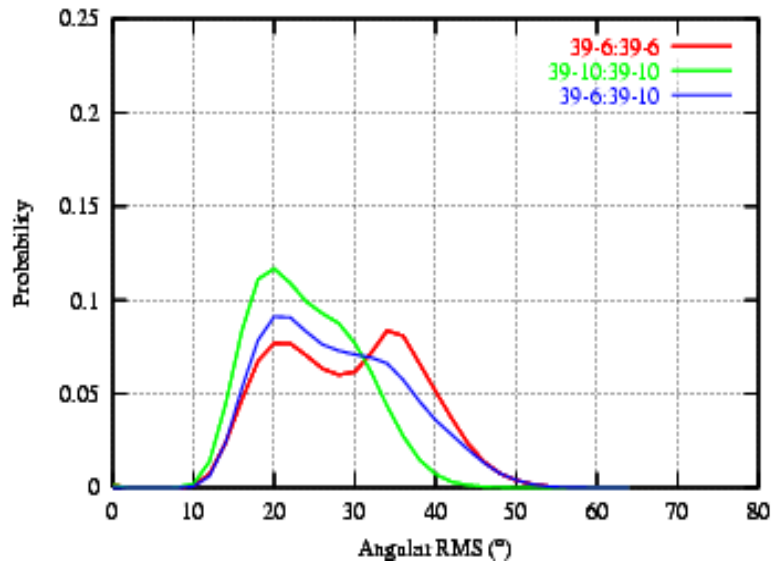

40: GGCA

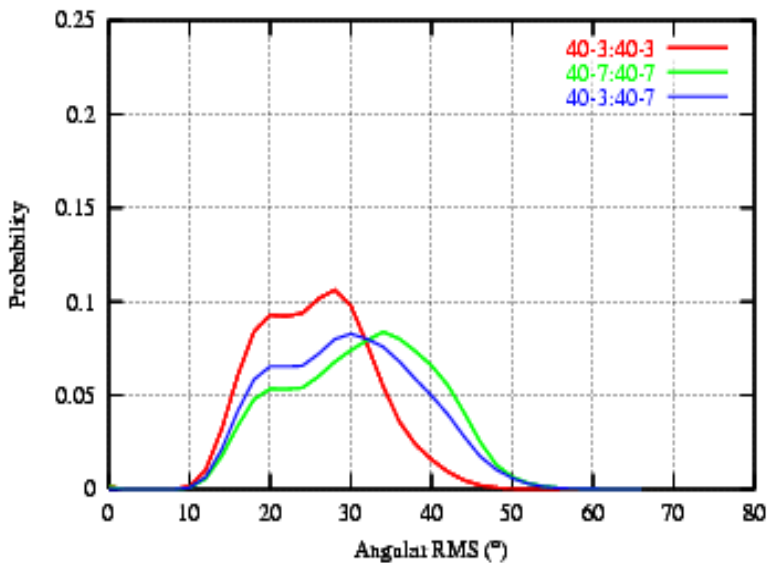

40: GCAG

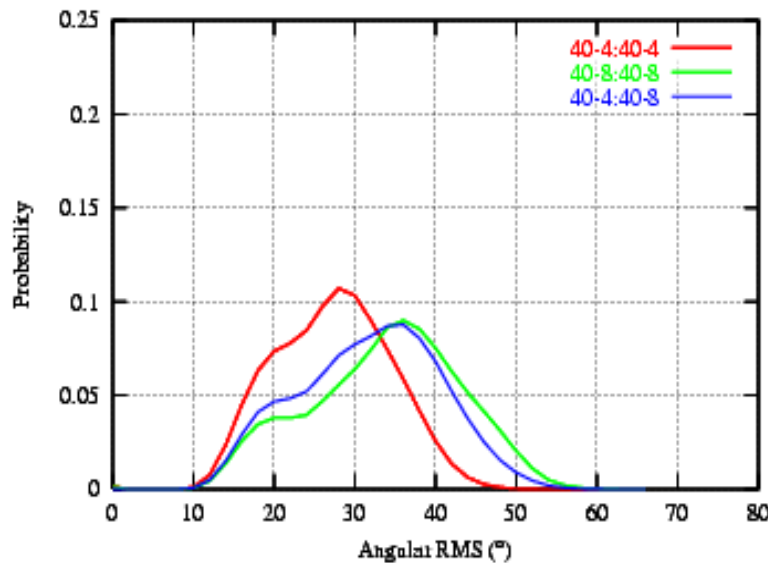

40: CAGG

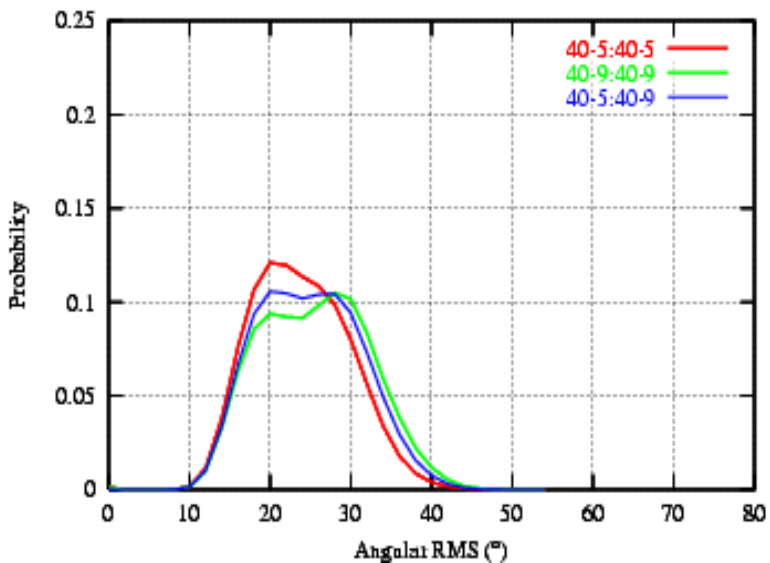

40: AGGC

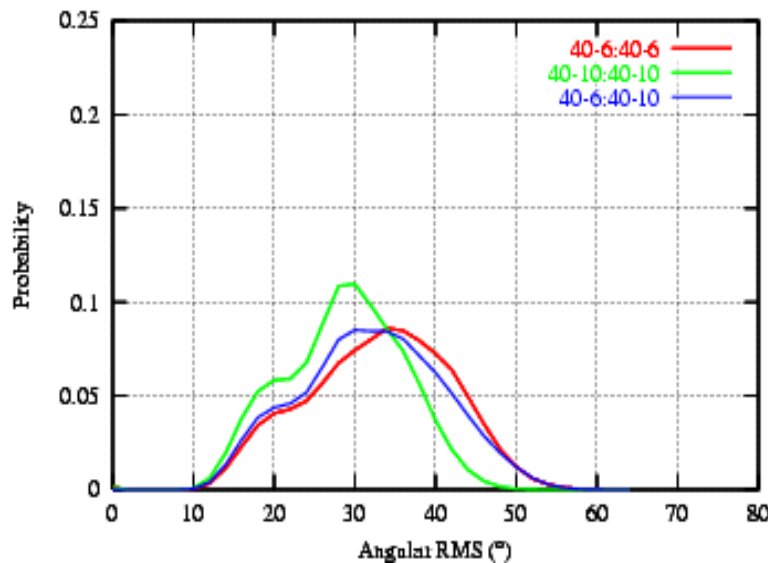

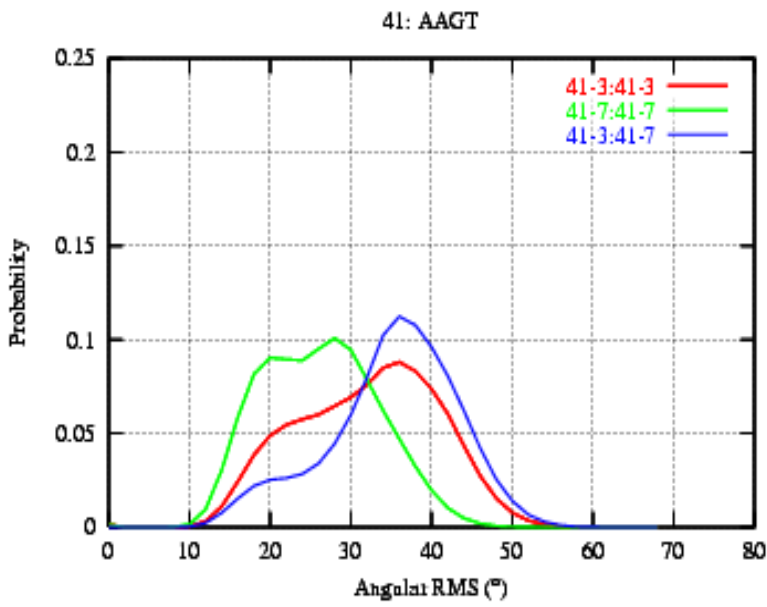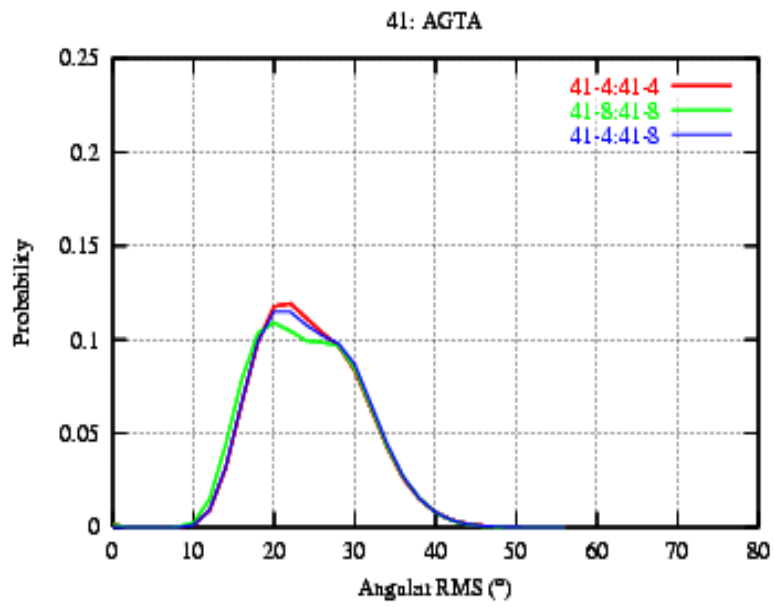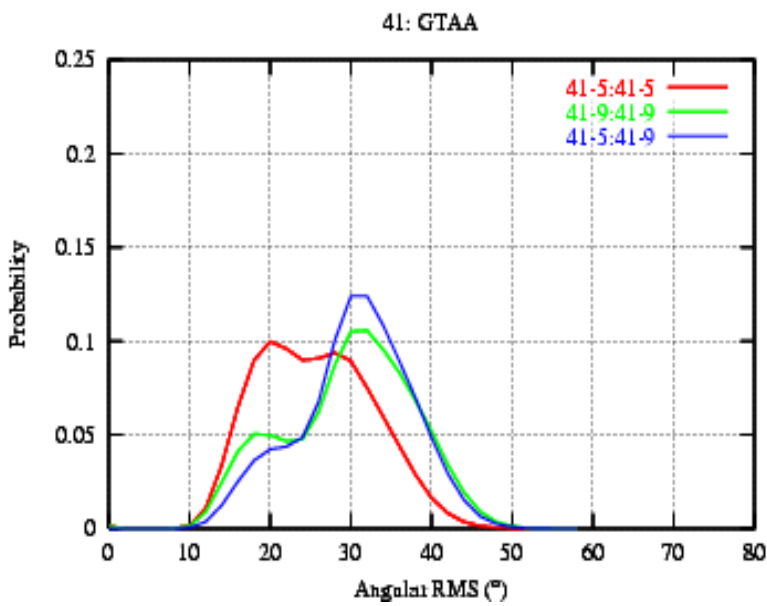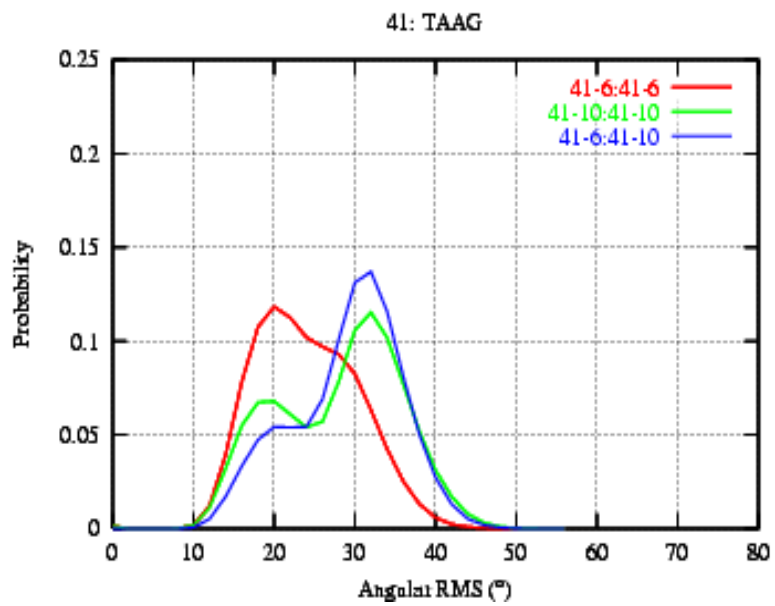

42: GCAT

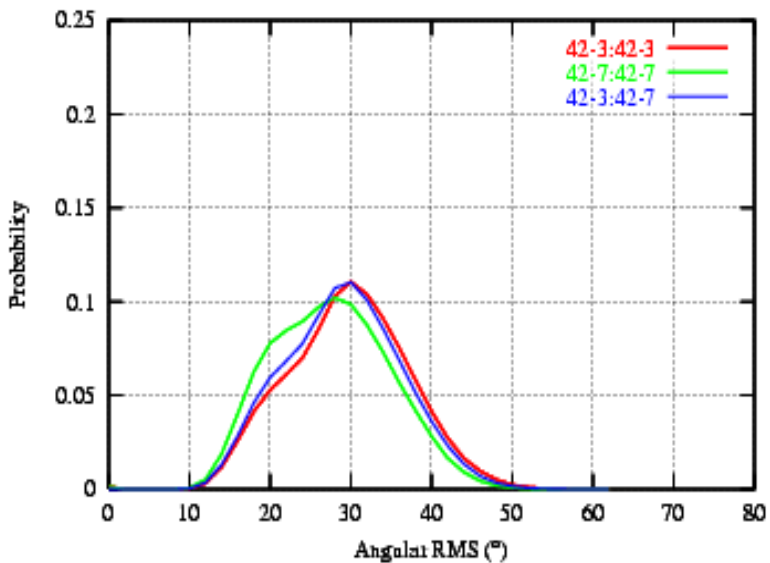

42: CATG

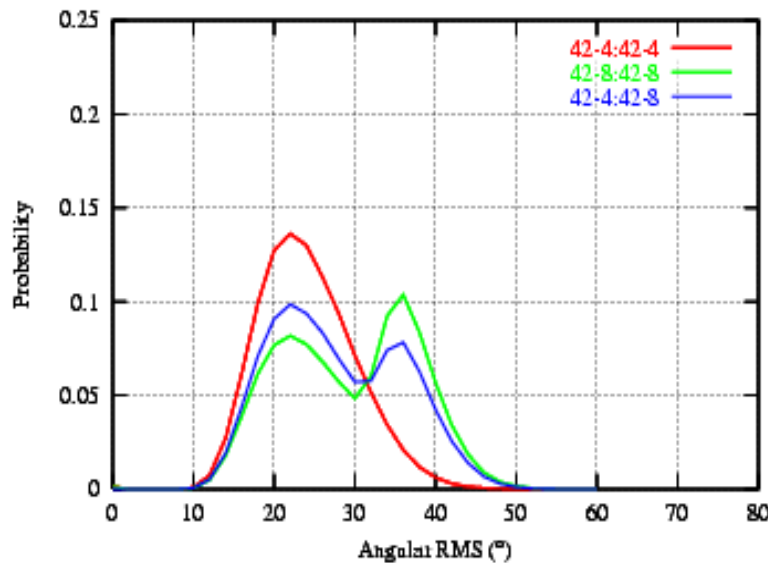

42: ATGC

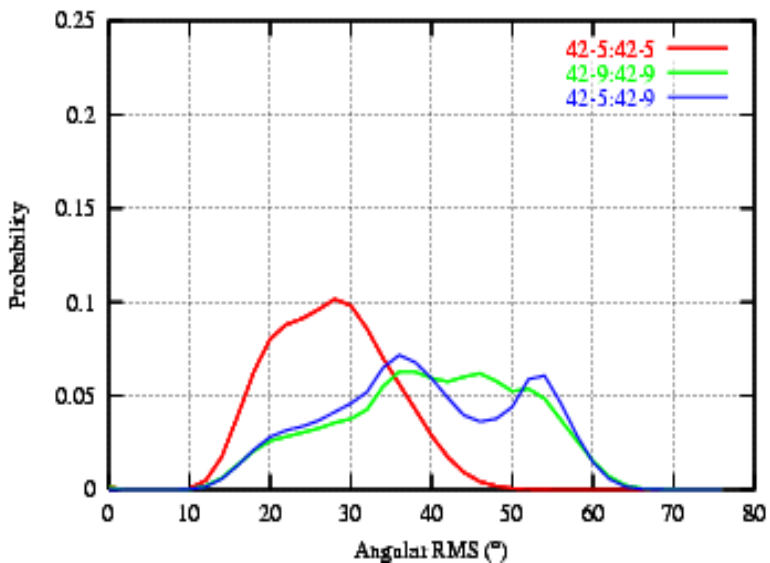

42: TGCA

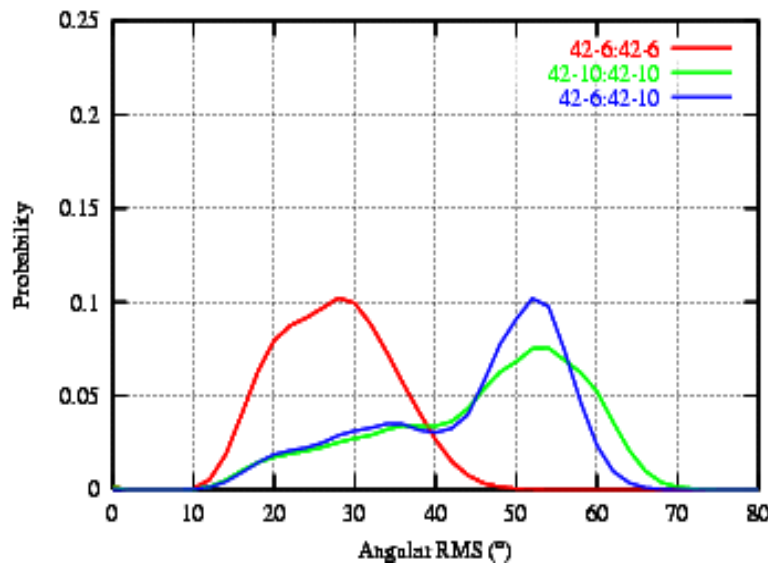

Supplement: biophysj_105.067397_5.pdf [file biophysj_105.067397_5.pdf]
