# Supplementary material
Source: PubMed Central journal article supplement (PMC1366942)
Supplement: biophysj_105.067397_3.pdf [file biophysj_105.067397_3.pdf]

## 4: GGGG

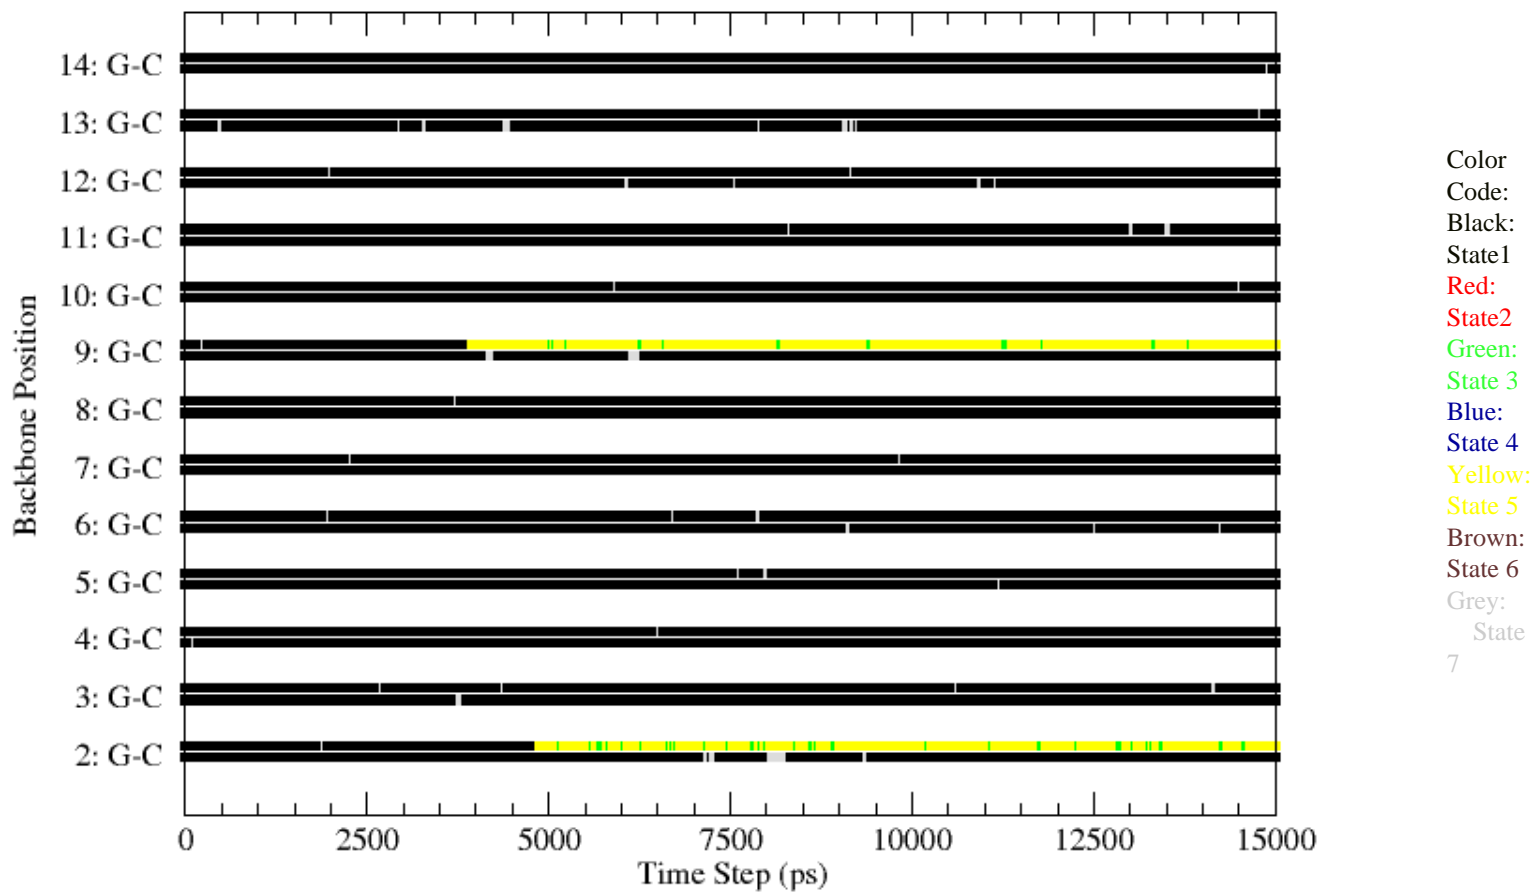

## 5: AAAG

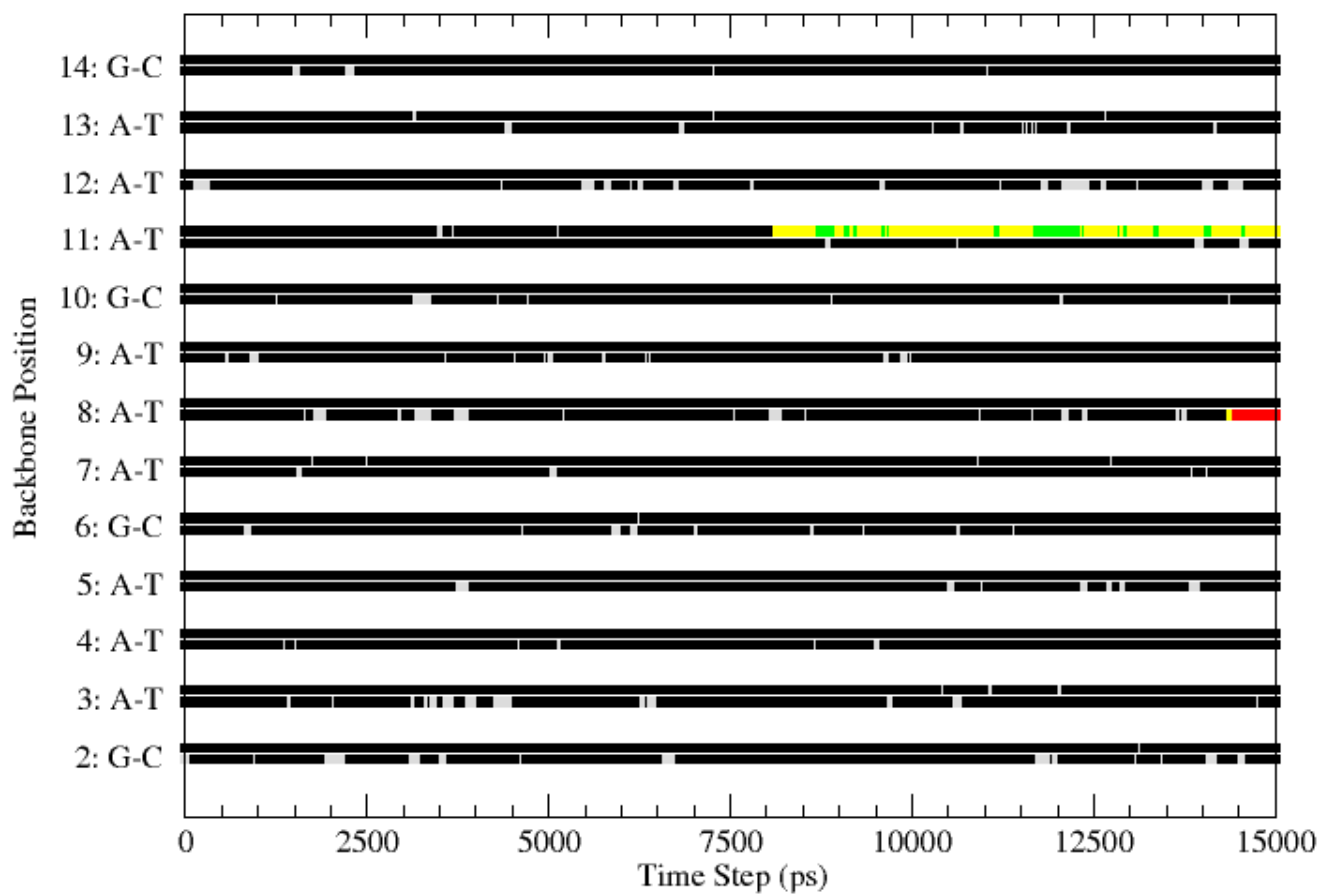

Black:  
State 1  
Red:  
State 2  
Green:  
State 3  
Blue:  
State 4  
Yellow:  
State 5  
Brown:  
State 6  
Grey:  
State 7

Color  
Code:

## 6: GGTA

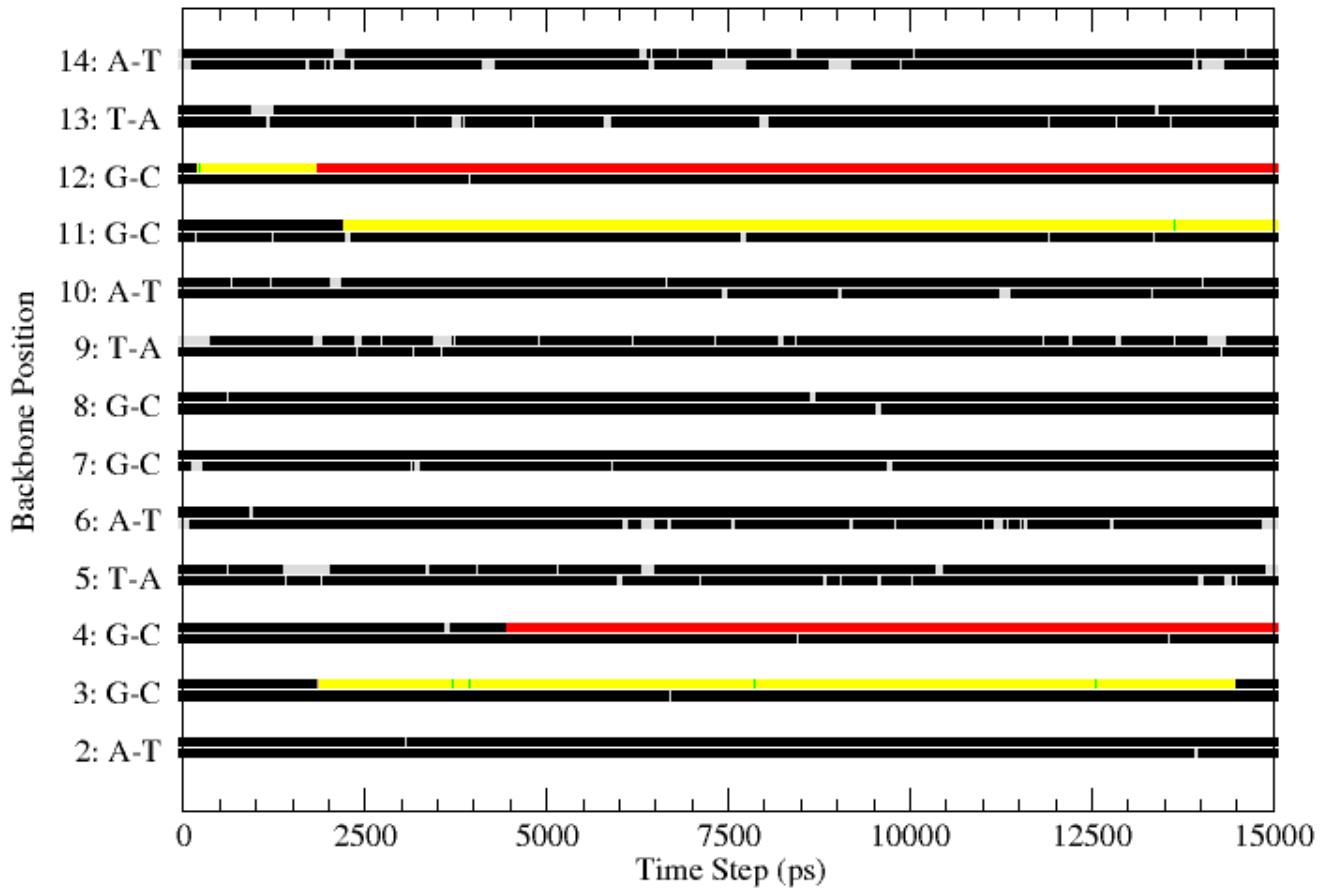

Black:  
State 1  
Red:  
State 2  
Green:  
State 3  
Blue:  
State 4  
Yellow:  
State 5  
Brown:  
State 6  
Grey:  
State 7

Color  
Code:

## 7: AATG

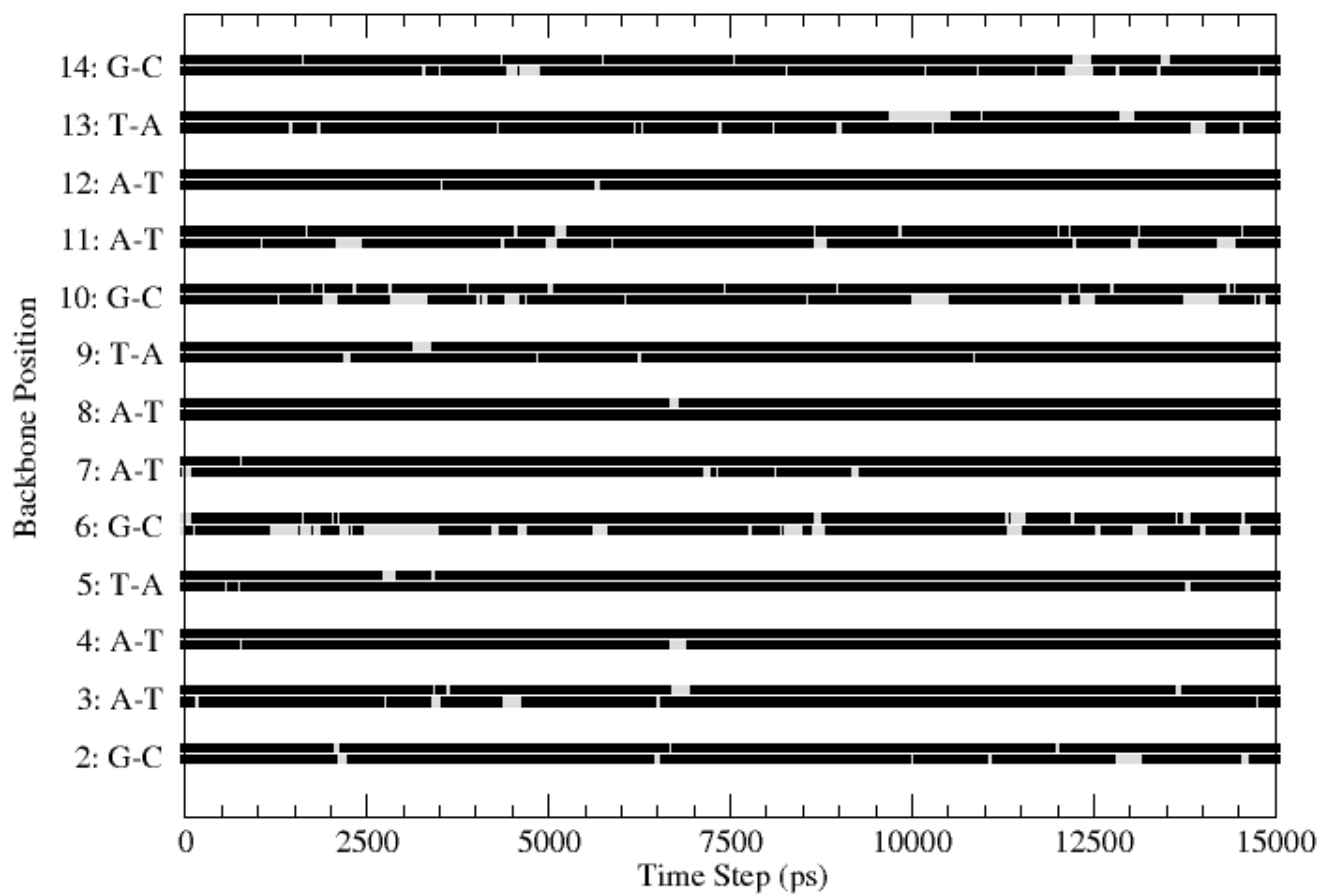

Black:  
State 1  
Red:  
State 2  
Green:  
State 3  
Blue:  
State 4  
Yellow:  
State 5  
Brown:  
State 6  
Grey:  
State  
7

Color  
Code:

## 8: GATC

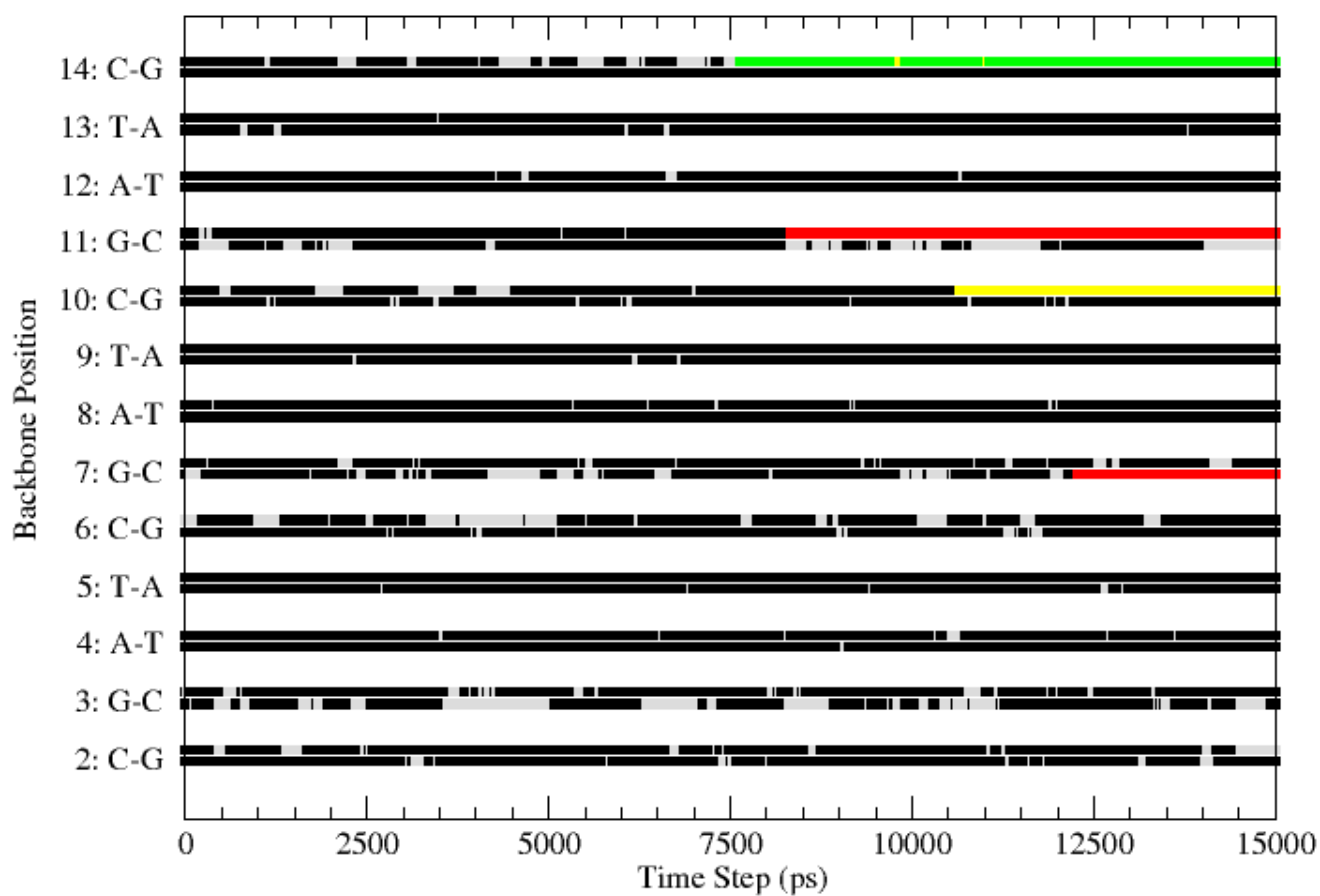

Black:  
State 1  
Red:  
State 2  
Green:  
State 3  
Blue:  
State 4  
Yellow:  
State 5  
Brown:  
State 6  
Grey:  
State 7

Color  
Code:

## 9: AAAA

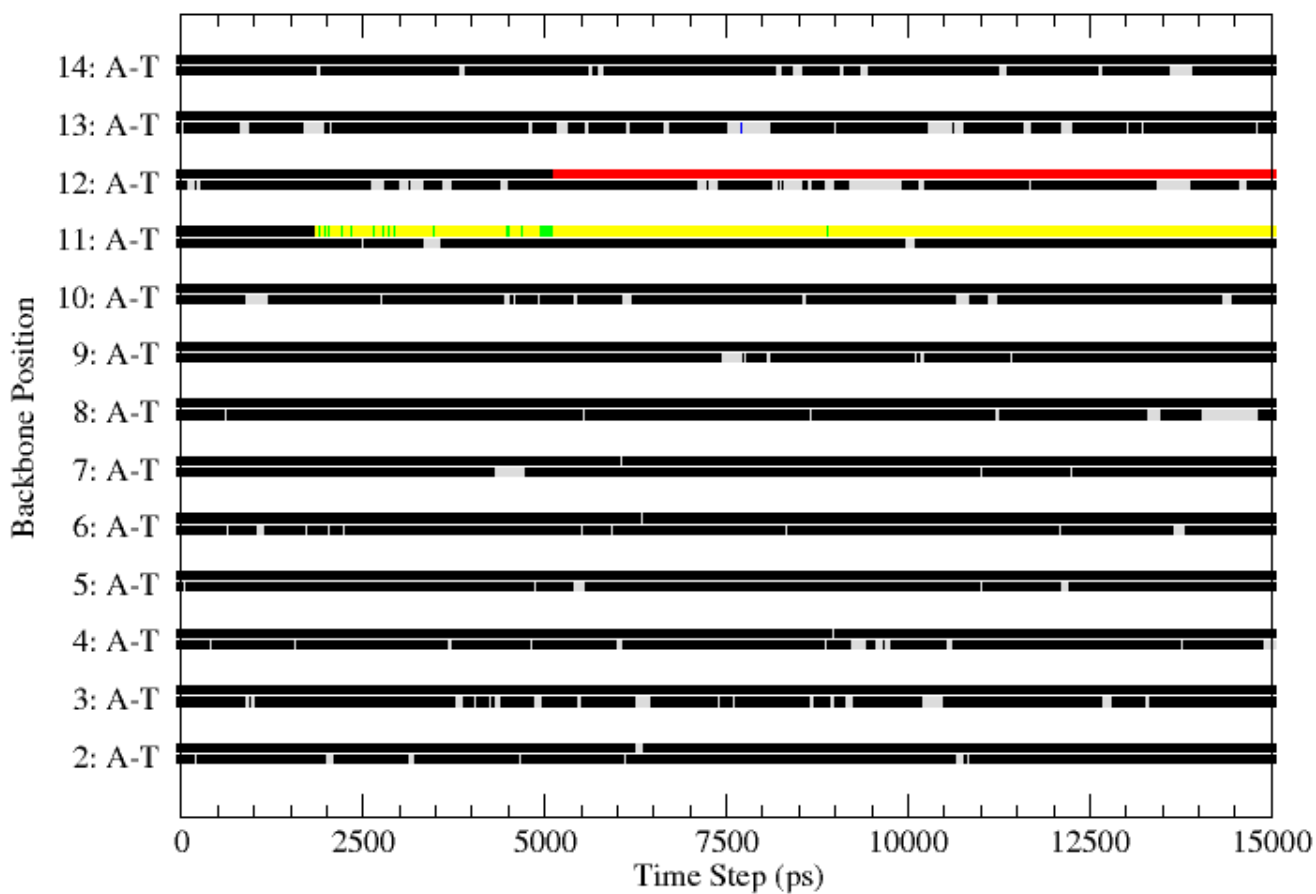

Black:  
State 1  
Red:  
State 2  
Green:  
State 3  
Blue:  
State 4  
Yellow:  
State 5  
Brown:  
State 6  
Grey:  
State 7

Color  
Code:

## 10: AAAC

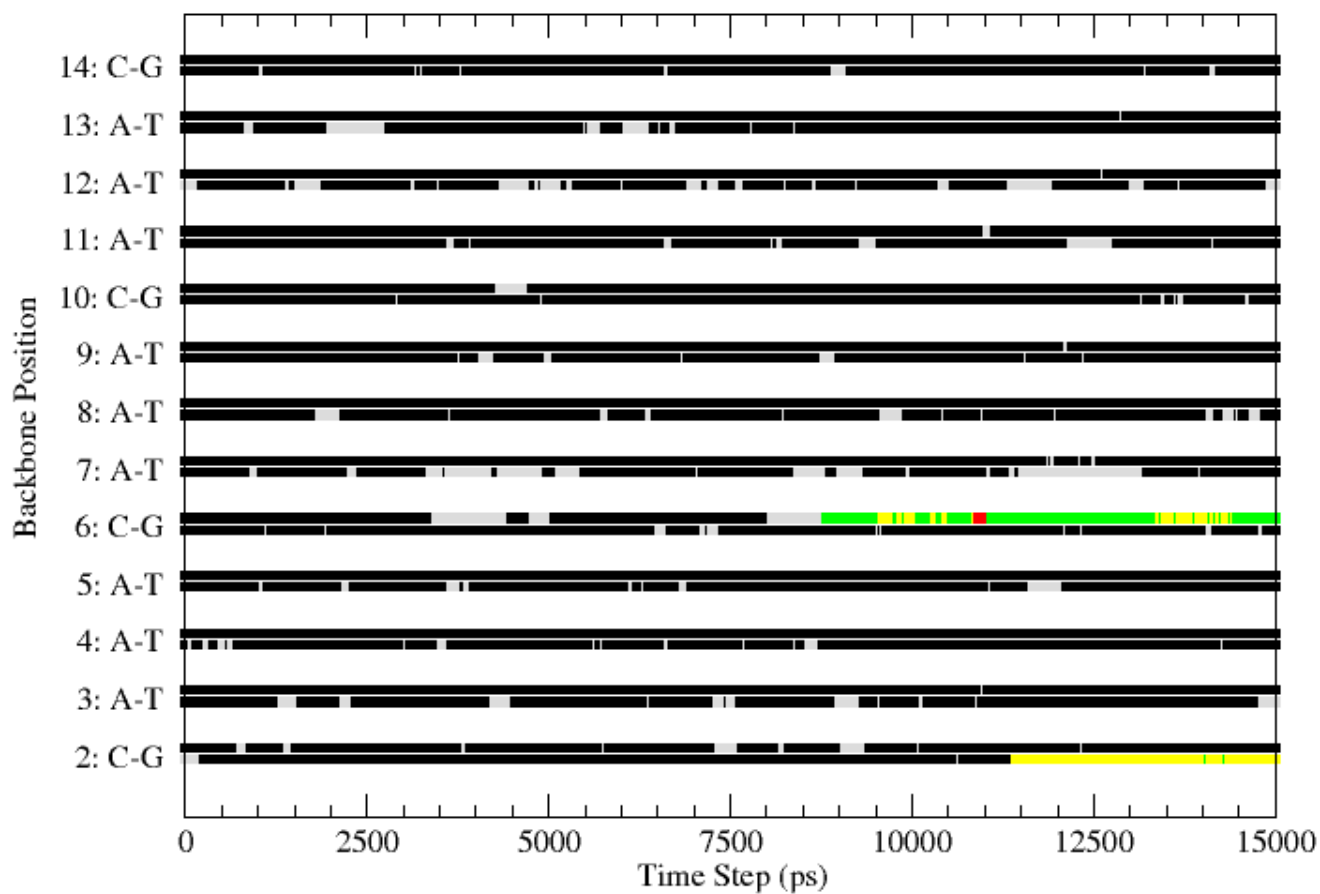

Black:  
State 1  
Red:  
State 2  
Green:  
State 3  
Blue:  
State 4  
Yellow:  
State 5  
Brown:  
State 6  
Grey:  
State 7

Color  
Code:

## 11: GGAT

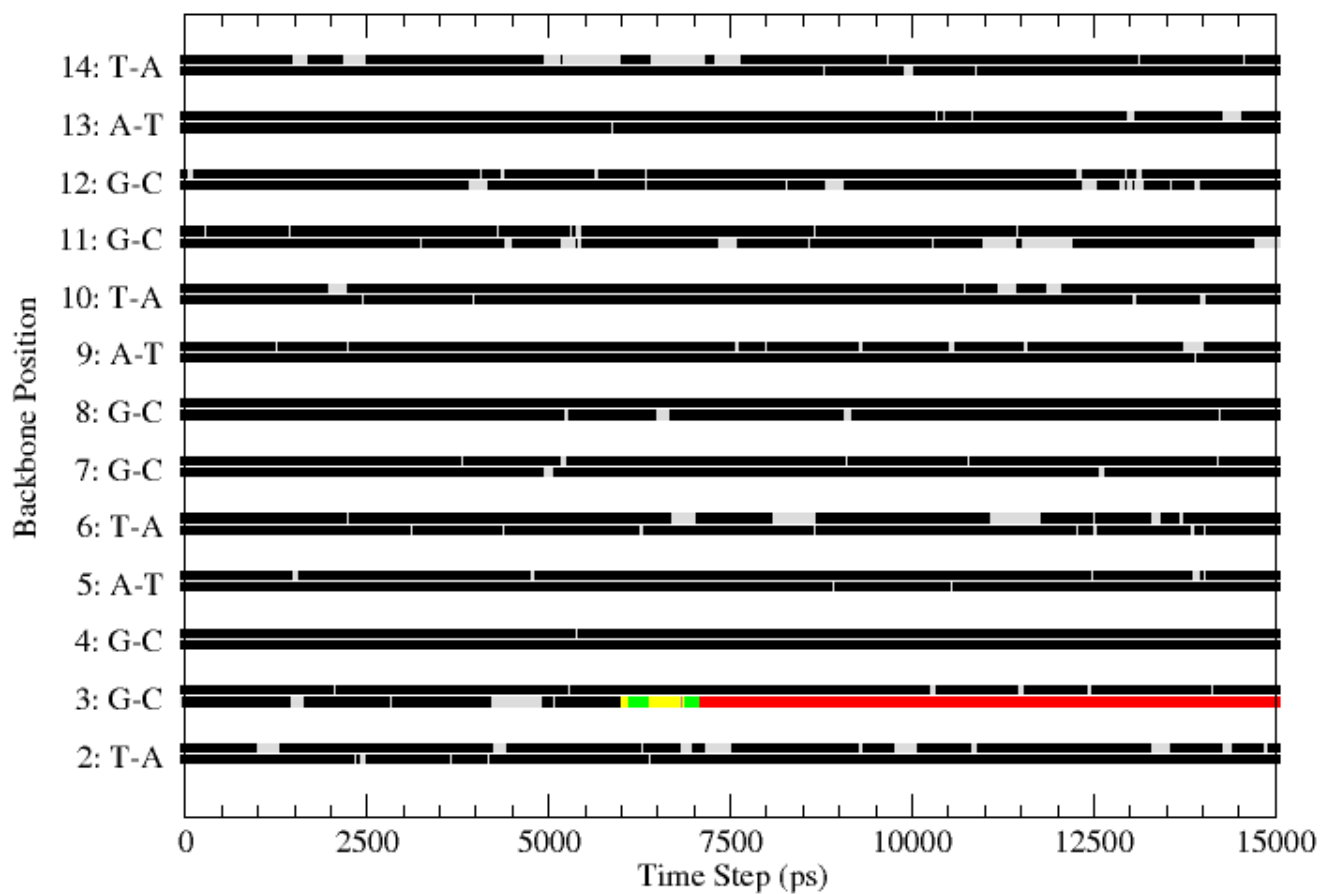

Black:  
State 1  
Red:  
State 2  
Green:  
State 3  
Blue:  
State 4  
Yellow:  
State 5  
Brown:  
State 6  
Grey:  
State 7

Color  
Code:



## 12: GAGT

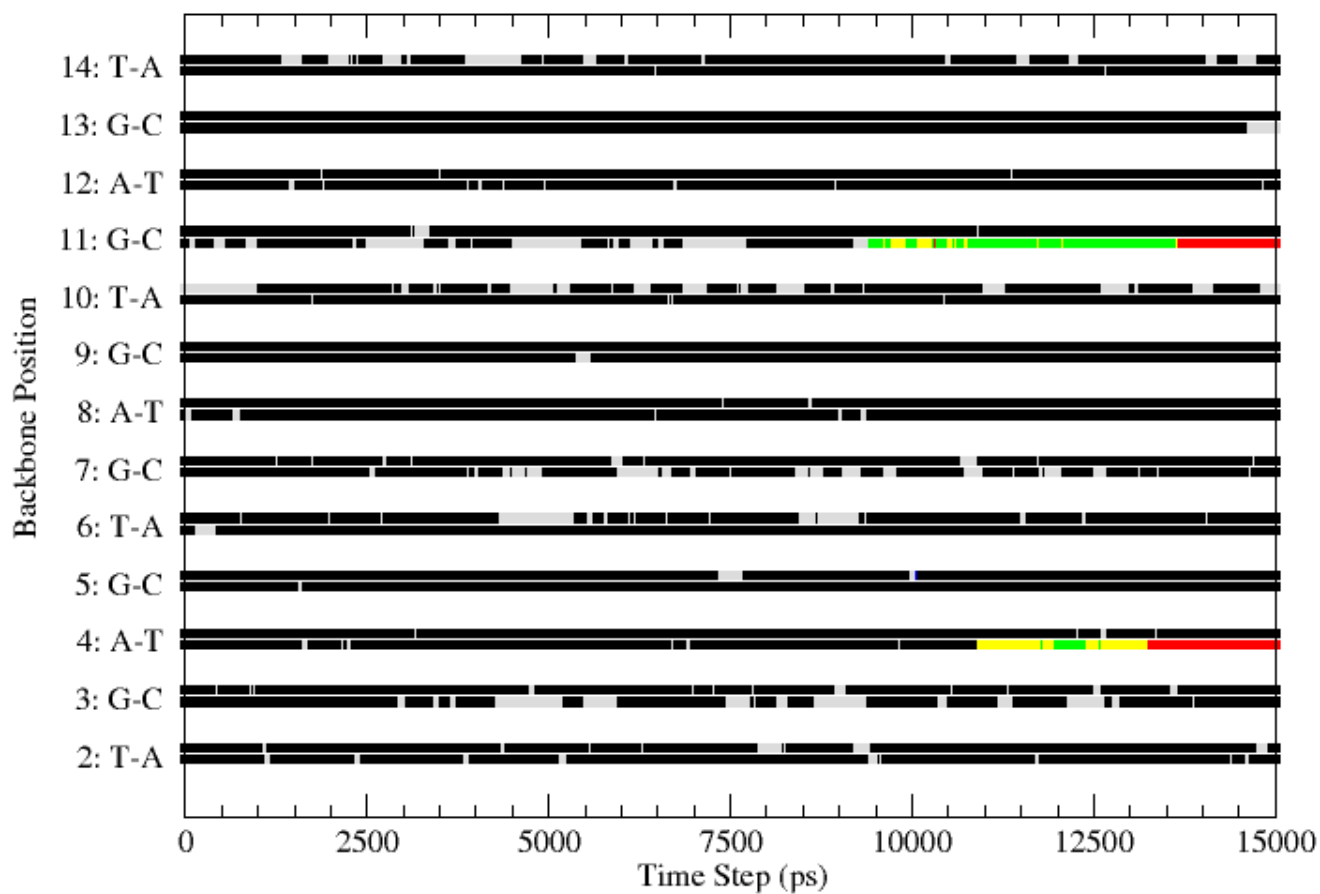

Black:  
State 1  
Red:  
State 2  
Green:  
State 3  
Blue:  
State 4  
Yellow:  
State 5  
Brown:  
State 6  
Grey:  
State 7

Color  
Code:

## 13: GACT

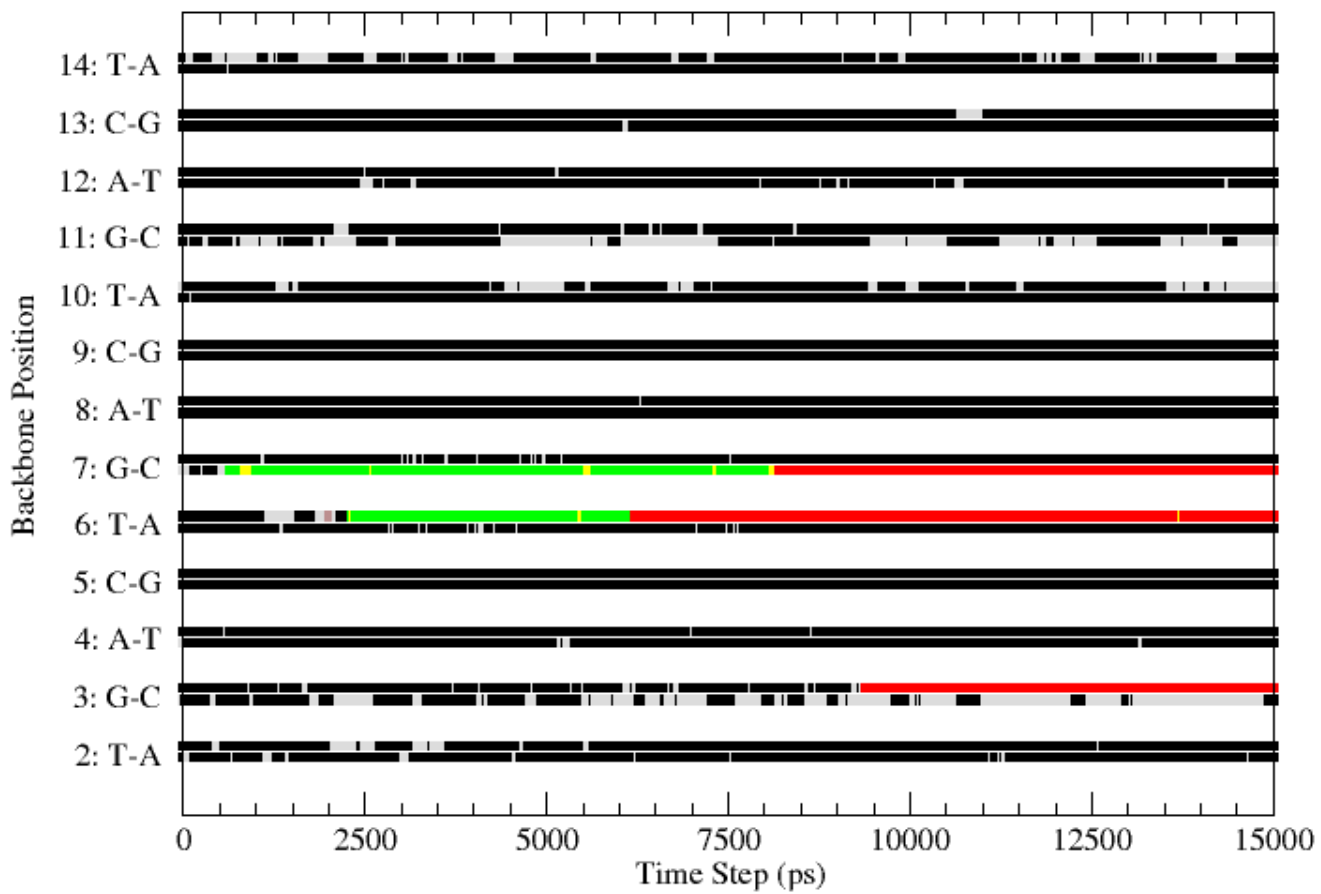

Black:  
State 1  
Red:  
State 2  
Green:  
State 3  
Blue:  
State 4  
Yellow:  
State 5  
Brown:  
State 6  
Grey:  
State 7

Color  
Code:

## 14: GCGC

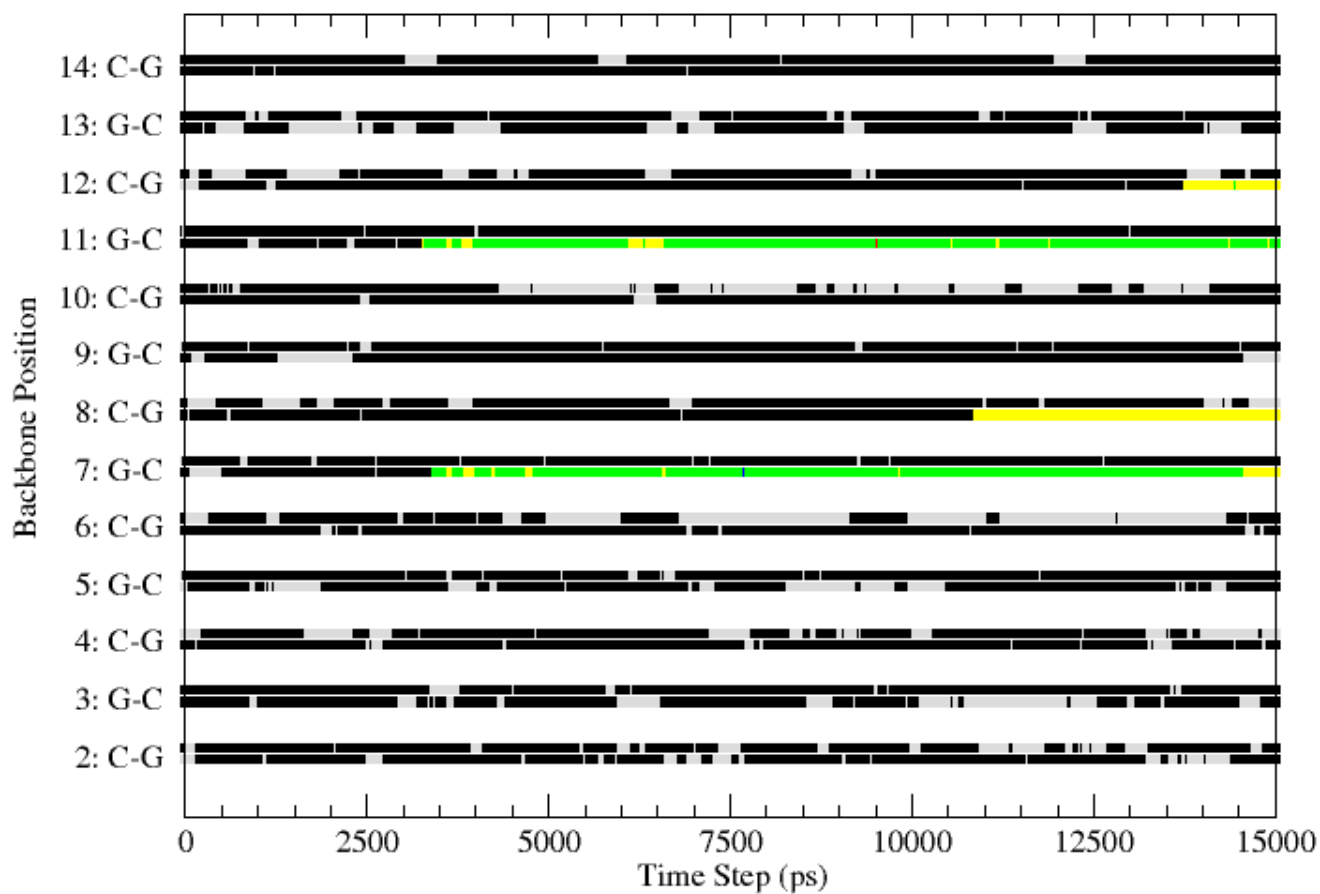

Black:  
State 1  
Red:  
State 2  
Green:  
State 3  
Blue:  
State 4  
Yellow:  
State 5  
Brown:  
State 6  
Grey:  
State 7

Color  
Code:

## 15: AAAT

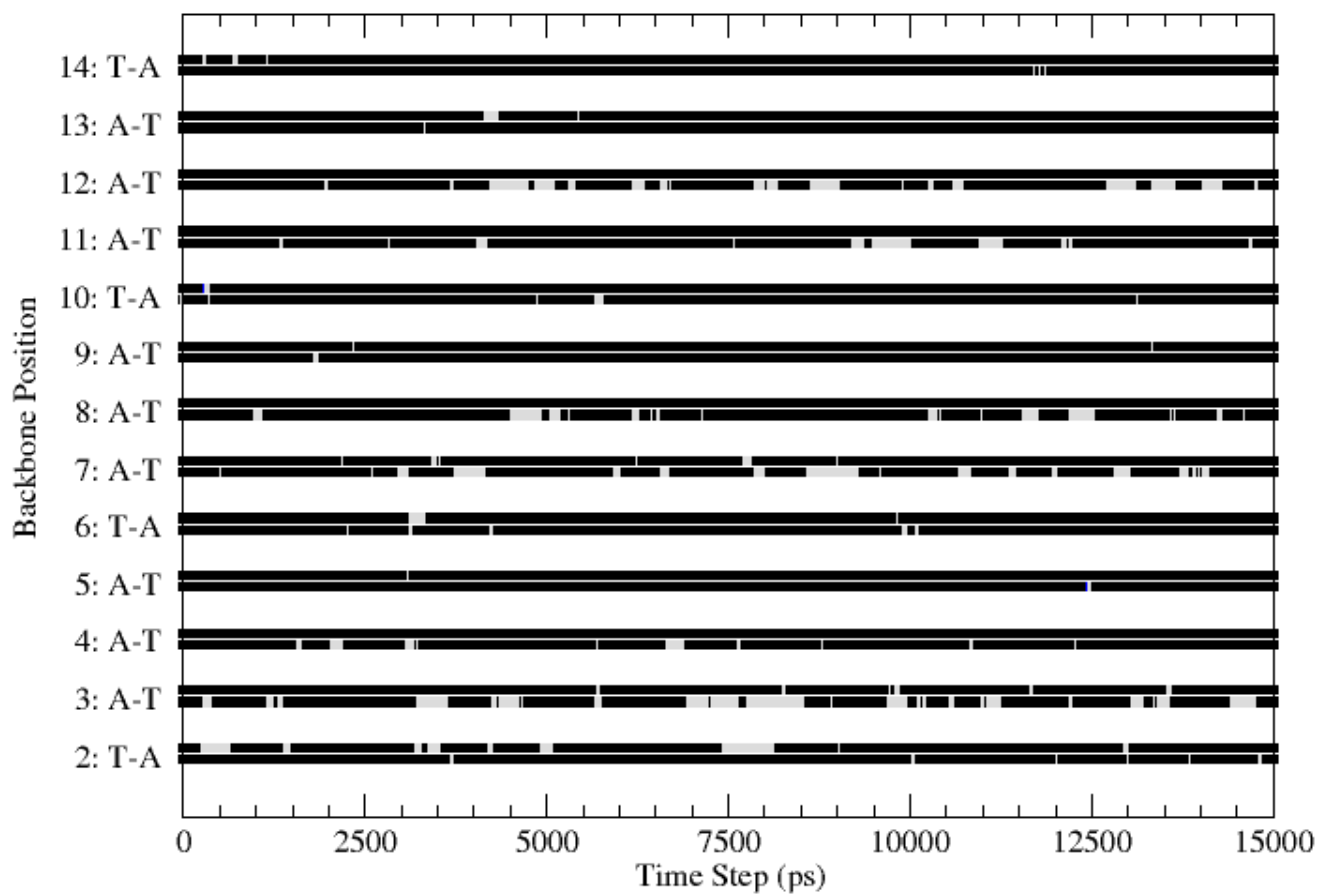

Black:  
State 1  
Red:  
State 2  
Green:  
State 3  
Blue:  
State 4  
Yellow:  
State 5  
Brown:  
State 6  
Grey:  
State 7

Color  
Code:

## 16: GGTC

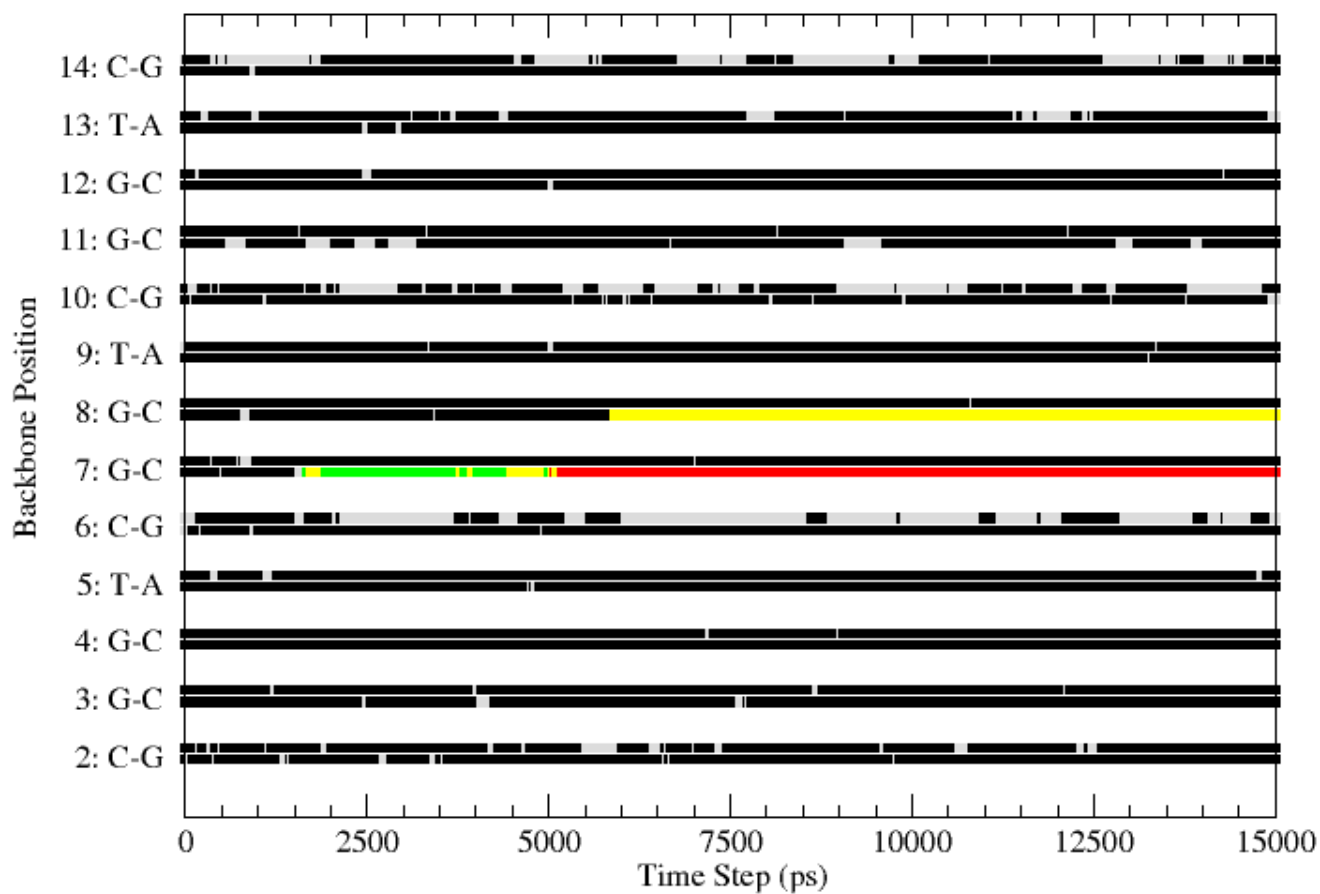

Black:  
State 1  
Red:  
State 2  
Green:  
State 3  
Blue:  
State 4  
Yellow:  
State 5  
Brown:  
State 6  
Grey:  
State 7

Color  
Code:

## 17: GAGC

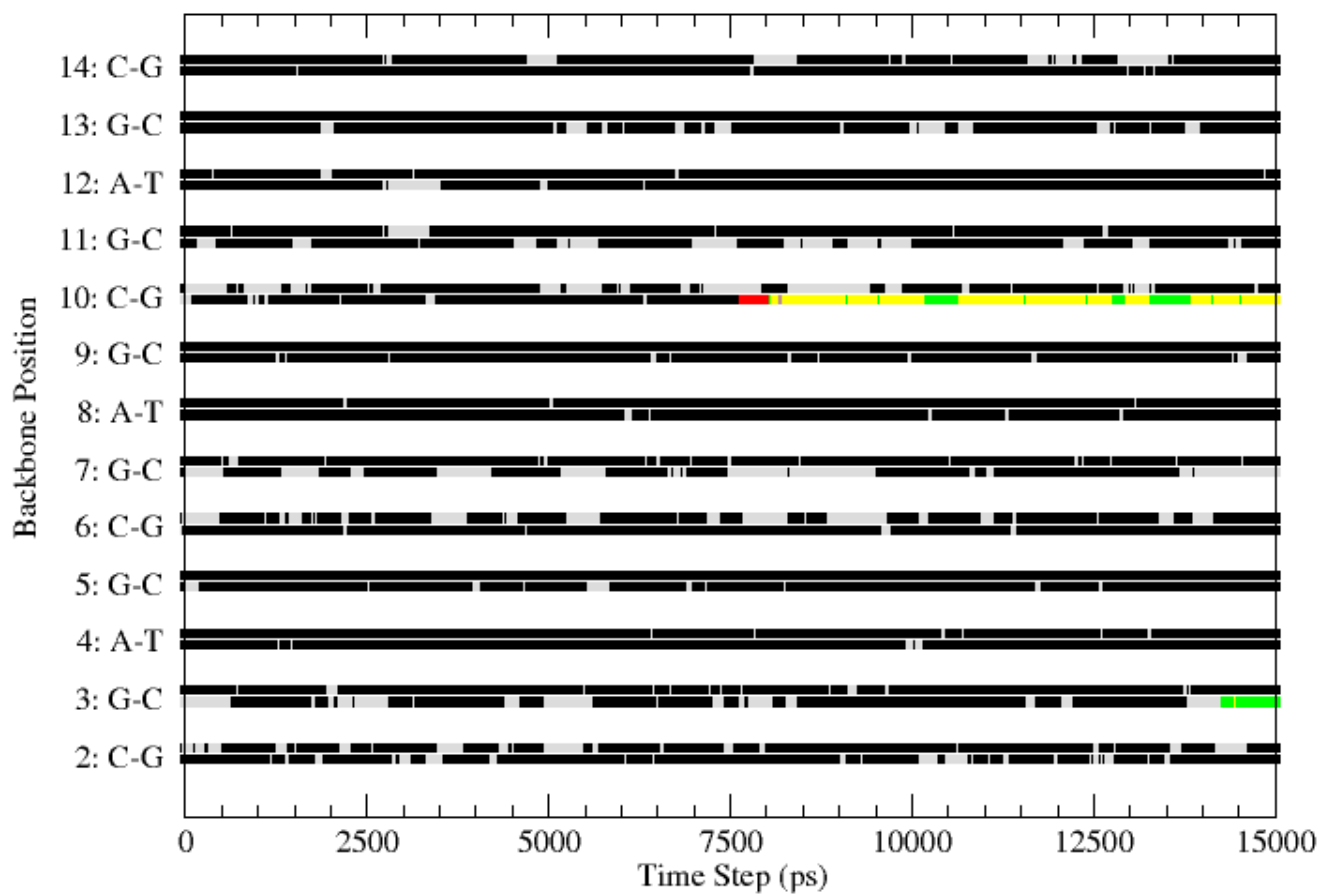

Black:  
State 1  
Red:  
State 2  
Green:  
State 3  
Blue:  
State 4  
Yellow:  
State 5  
Brown:  
State 6  
Grey:  
State  
7

Color  
Code:

## 18: GTAC

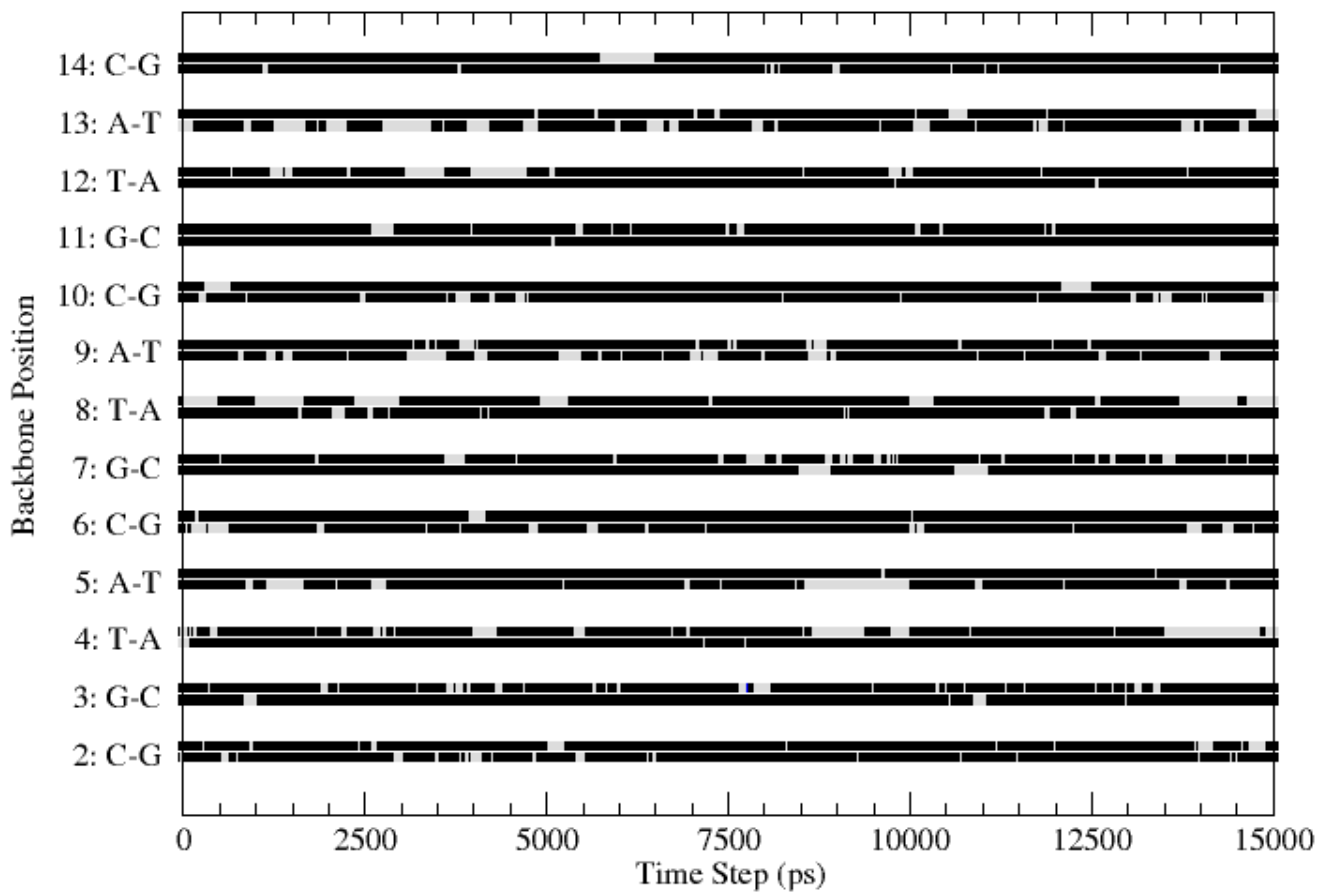

Black:  
State 1  
Red:  
State 2  
Green:  
State 3  
Blue:  
State 4  
Yellow:  
State 5  
Brown:  
State 6  
Grey:  
State  
7

Color  
Code:

## 19: ATAT

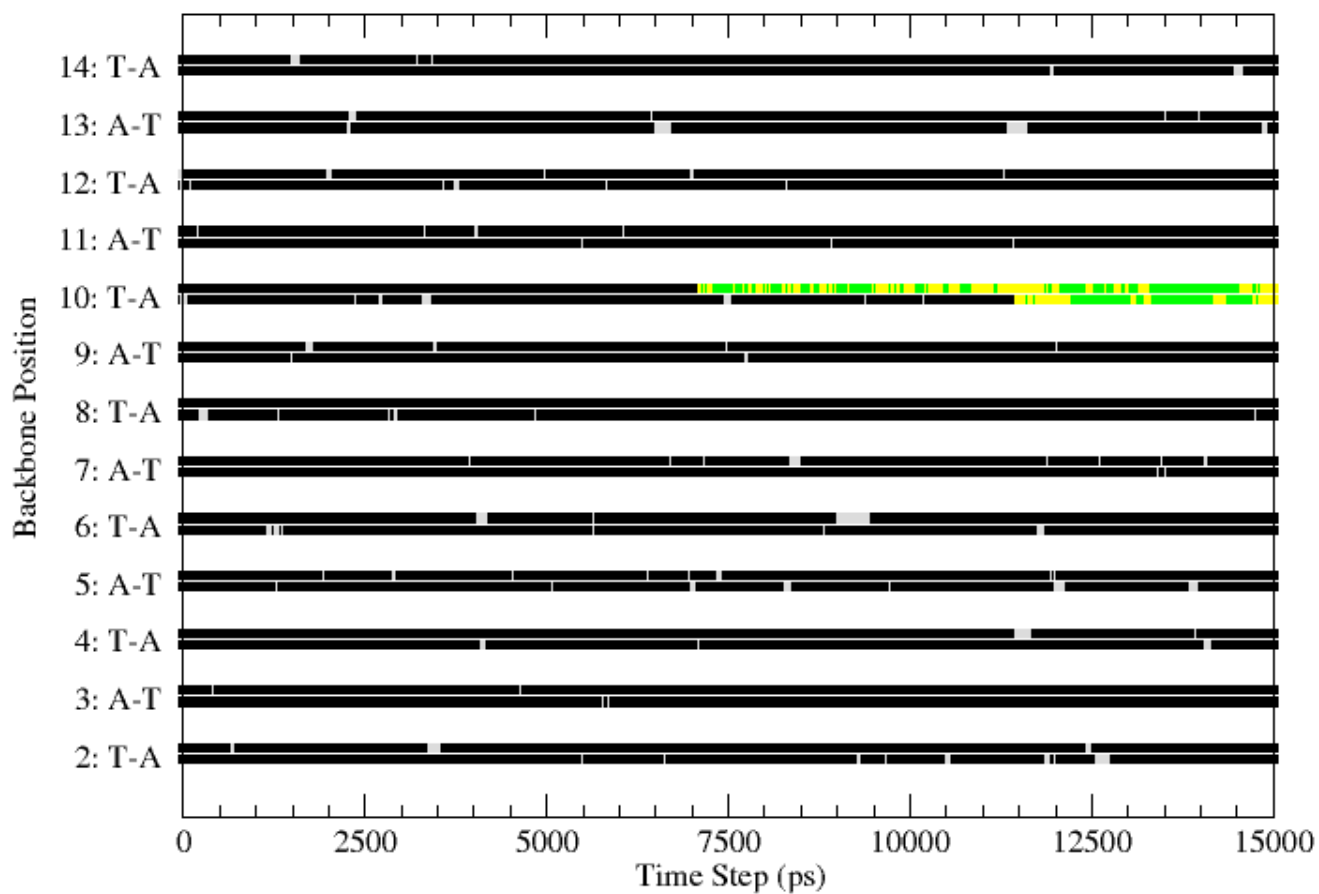

Black:  
State 1  
Red:  
State 2  
Green:  
State 3  
Blue:  
State 4  
Yellow:  
State 5  
Brown:  
State 6  
Grey:  
State 7

Color  
Code:



## 20: GGCC

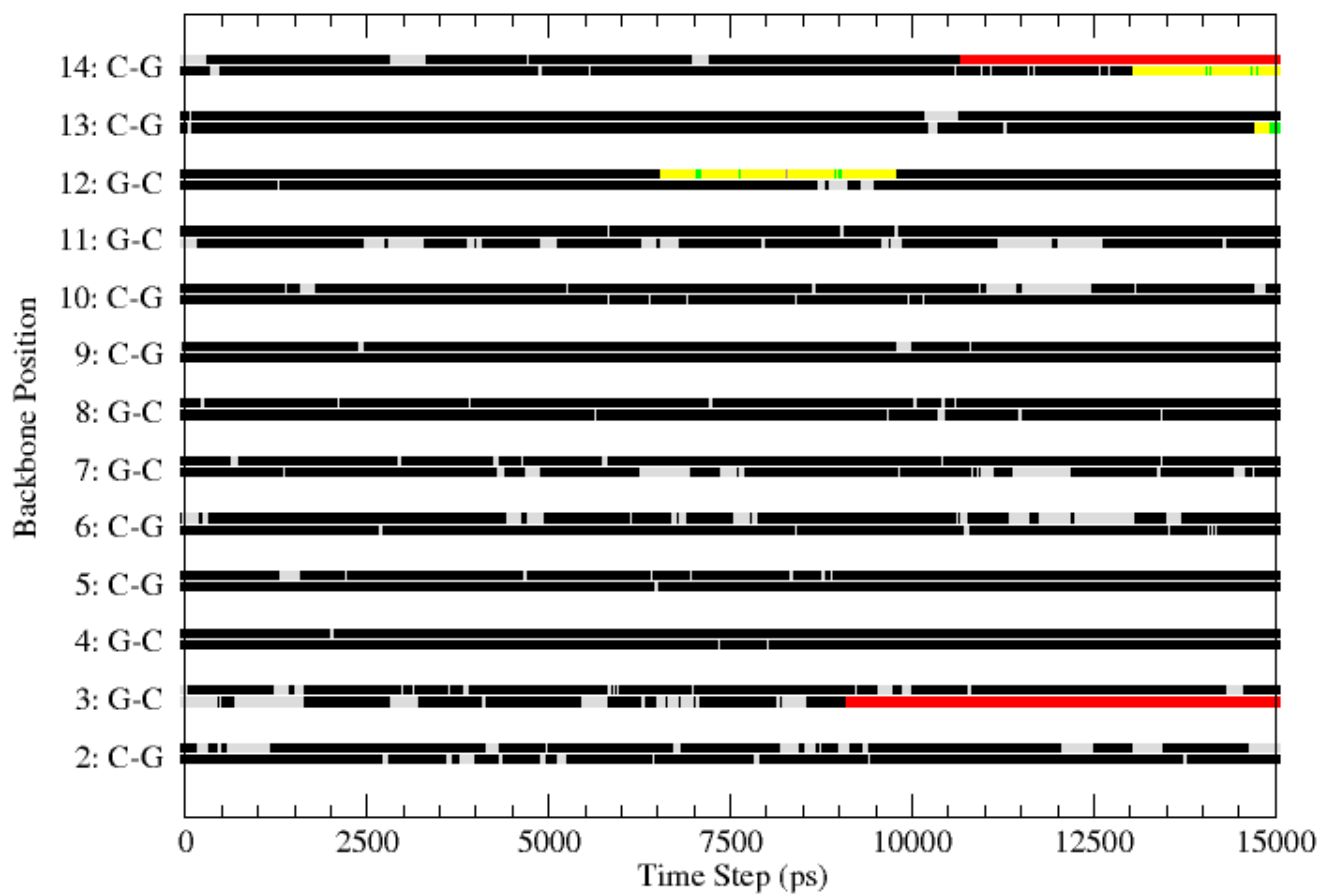

Black:  
State 1  
Red:  
State 2  
Green:  
State 3  
Blue:  
State 4  
Yellow:  
State 5  
Brown:  
State 6  
Grey:  
State  
7

Color  
Code:

## 21: GGCT

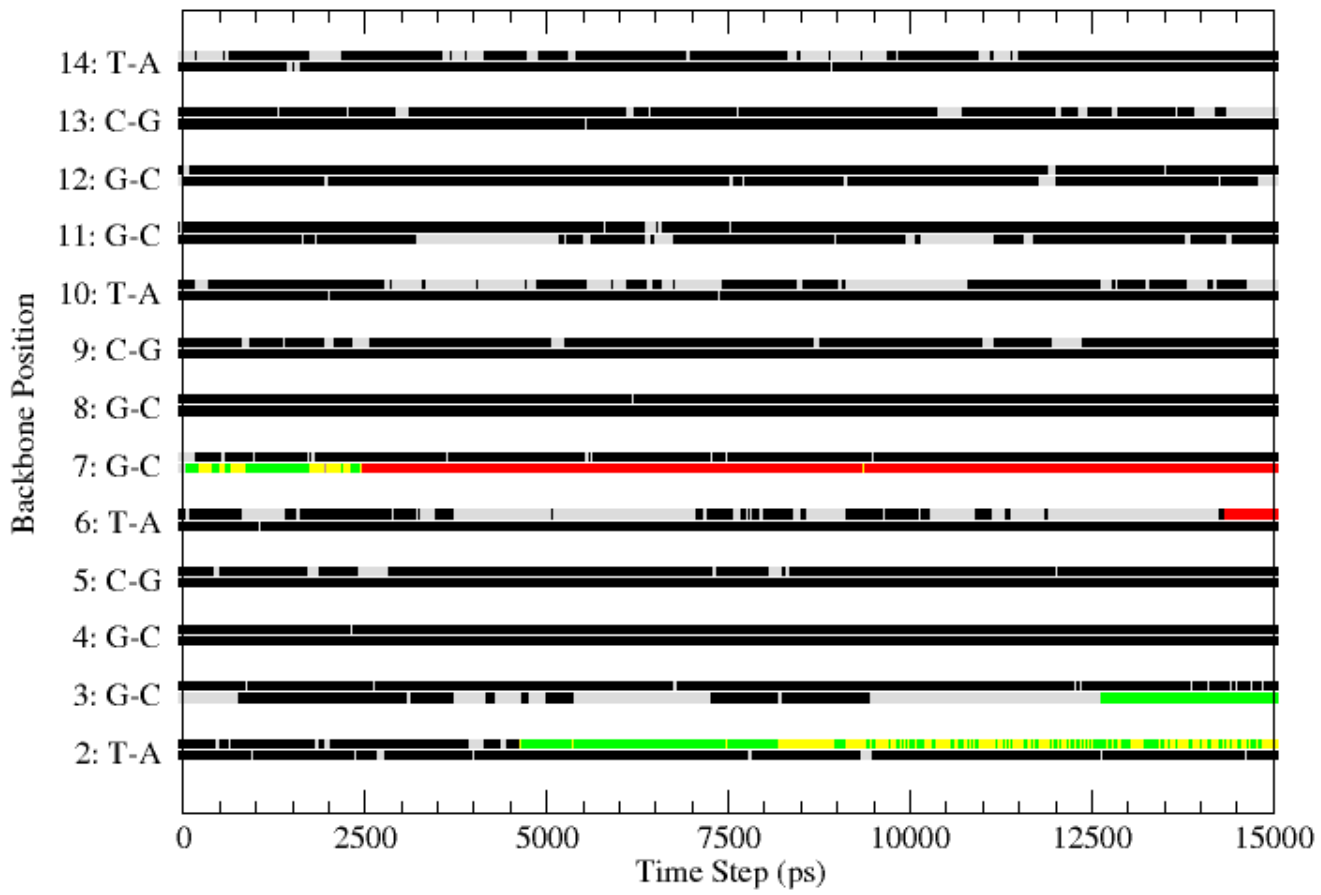

Black:  
State 1  
Red:  
State 2  
Green:  
State 3  
Blue:  
State 4  
Yellow:  
State 5  
Brown:  
State 6  
Grey:  
State 7

Color  
Code:

## 22: GCGT

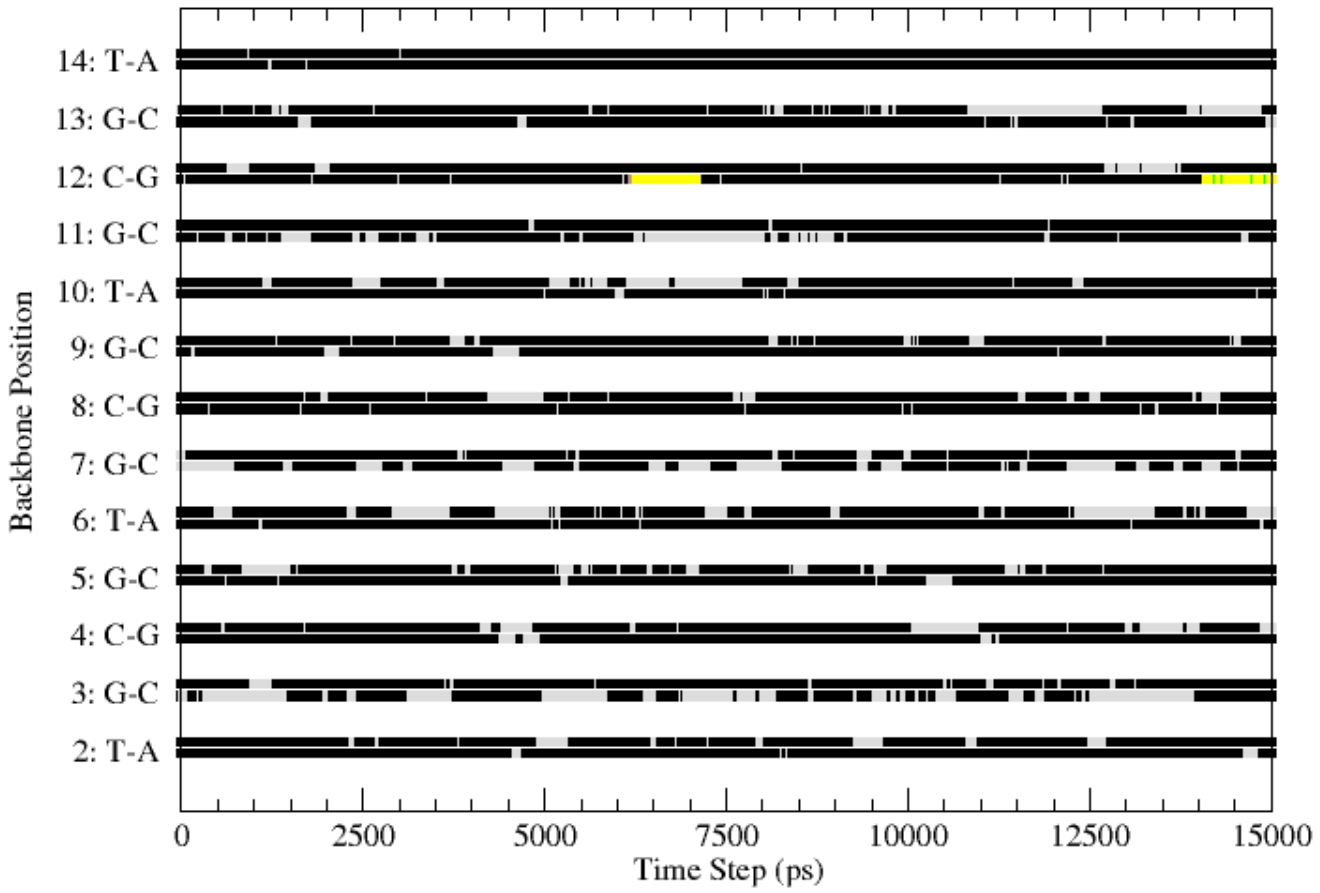

Black:  
State 1  
Red:  
State 2  
Green:  
State 3  
Blue:  
State 4  
Yellow:  
State 5  
Brown:  
State 6  
Grey:  
State 7

Color  
Code:

## 23: GAGA

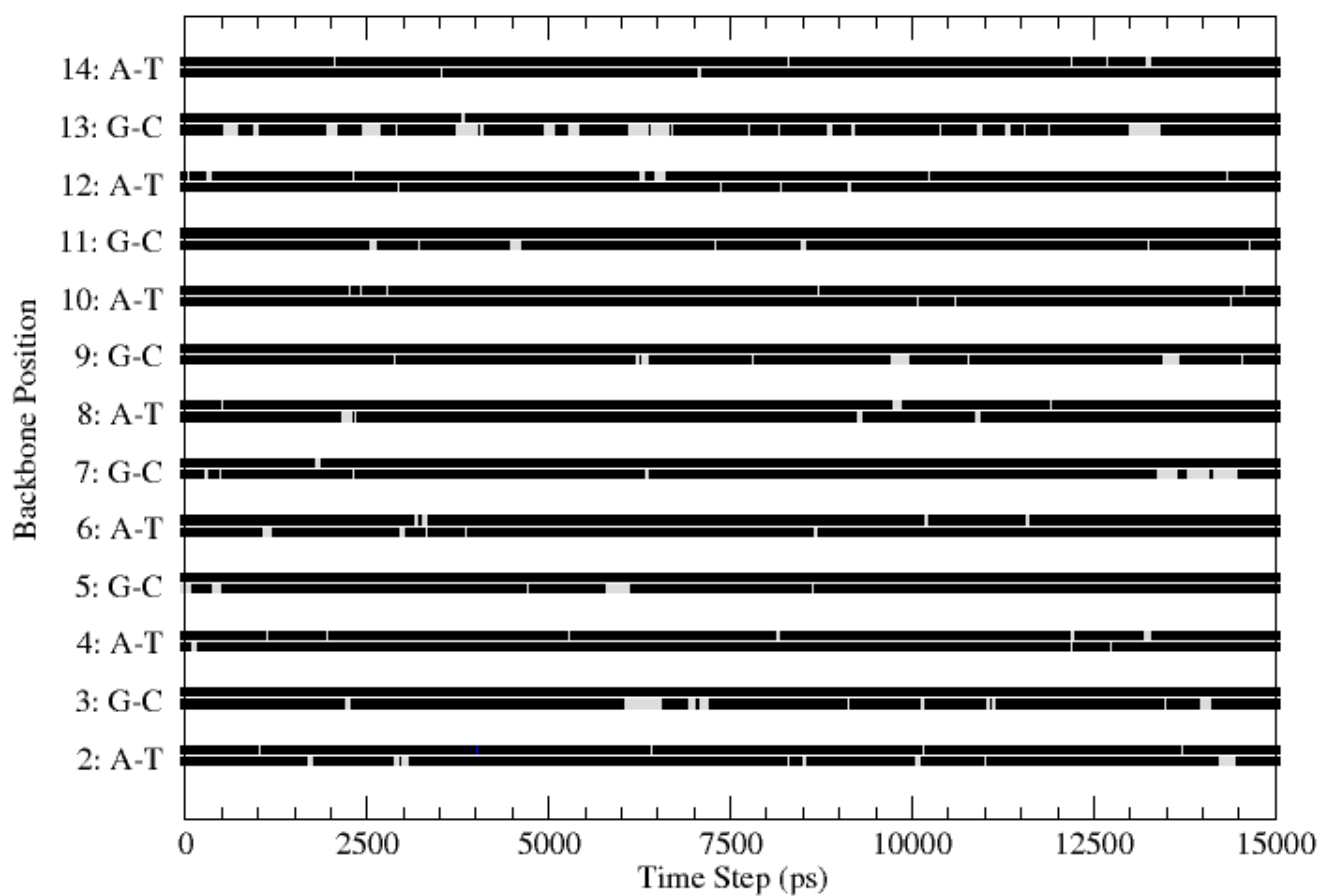

Black:  
State 1  
Red:  
State 2  
Green:  
State 3  
Blue:  
State 4  
Yellow:  
State 5  
Brown:  
State 6  
Grey:  
State 7

Color  
Code:

## 24: GGAA

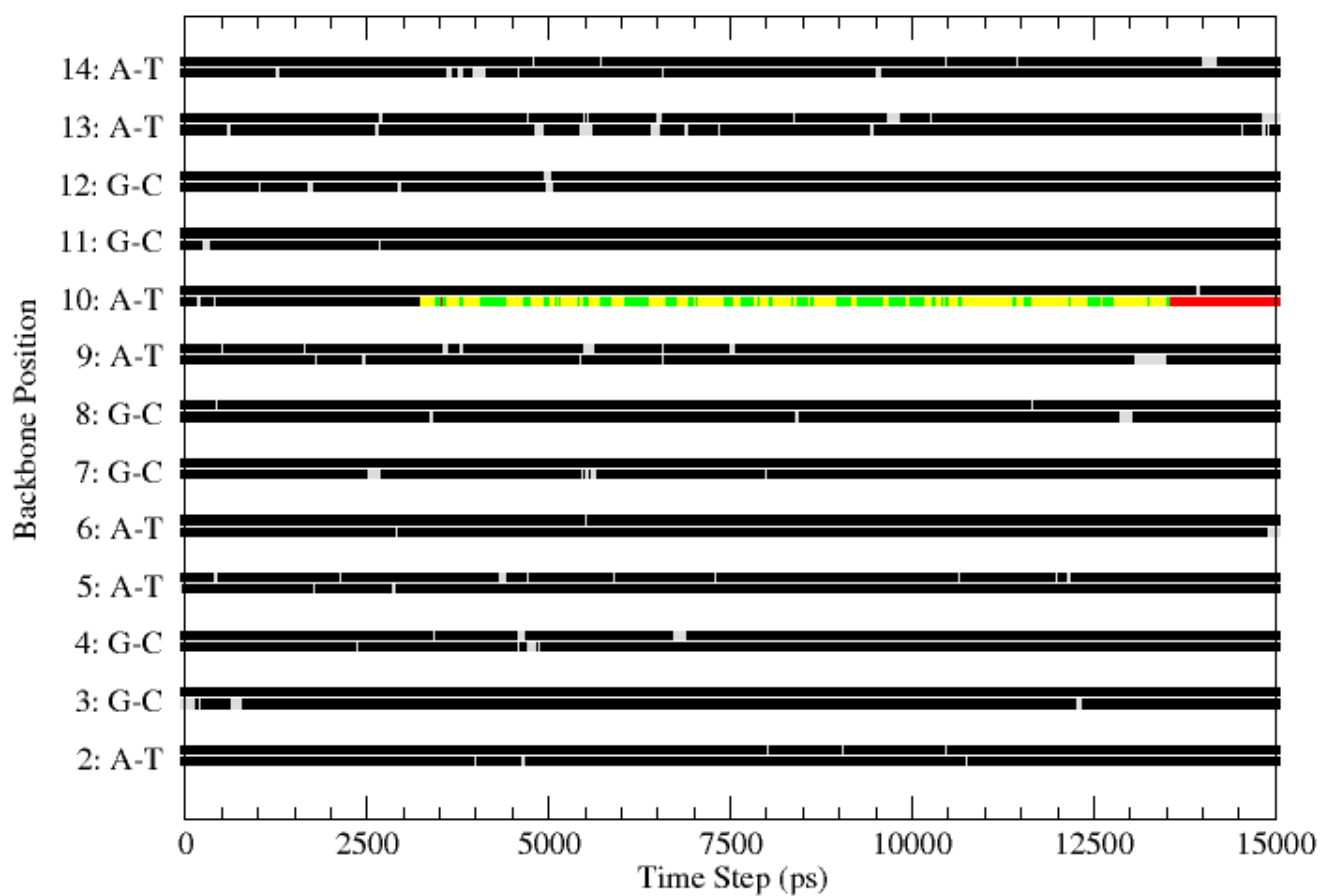

Black:  
State 1  
Red:  
State 2  
Green:  
State 3  
Blue:  
State 4  
Yellow:  
State 5  
Brown:  
State 6  
Grey:  
State  
7

Color  
Code:

## AAGC

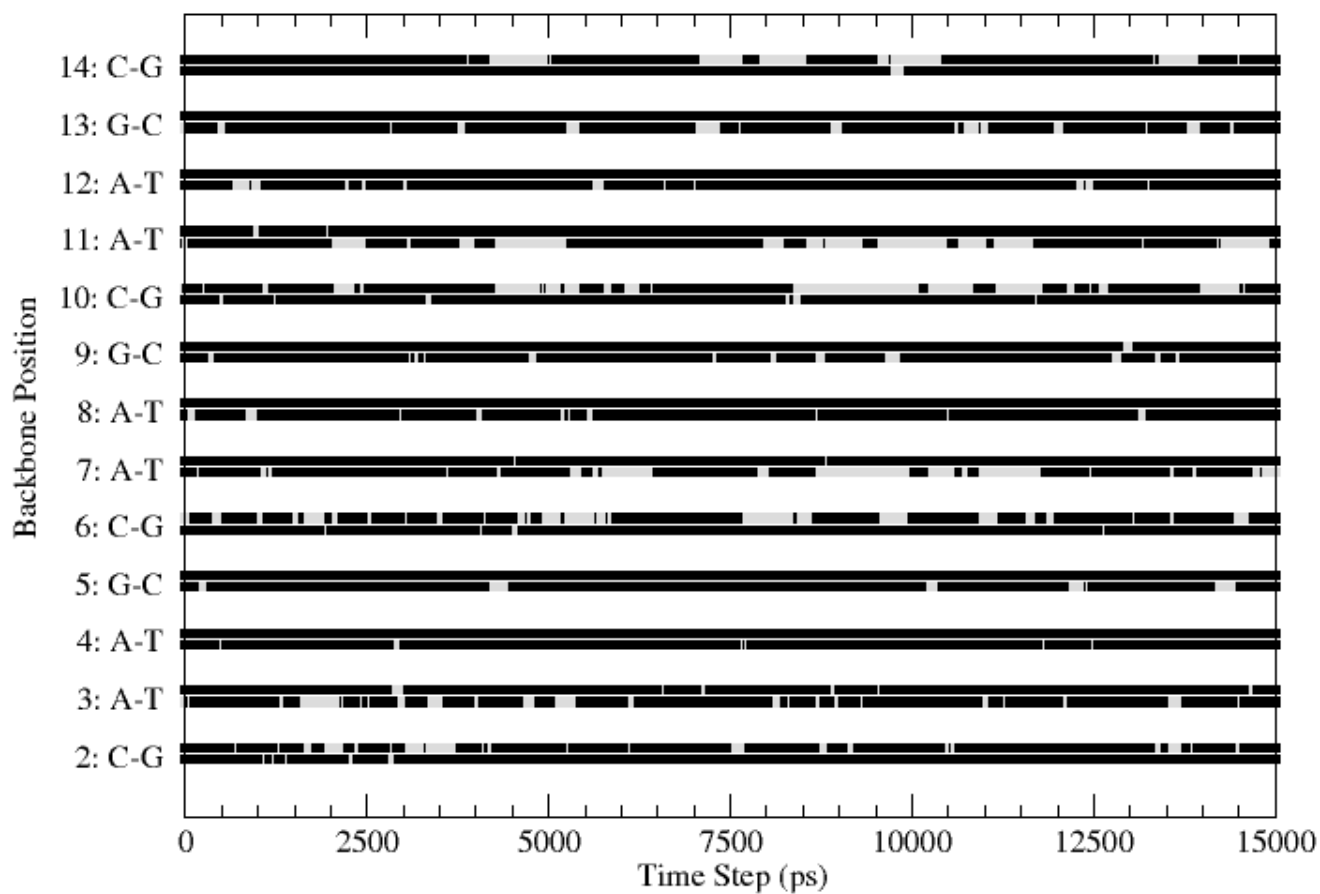

Black:  
State 1  
Red:  
State 2  
Green:  
State 3  
Blue:  
State 4  
Yellow:  
State 5  
Brown:  
State 6  
Grey:  
State 7  
7

Color  
Code:

## 26: AGAT

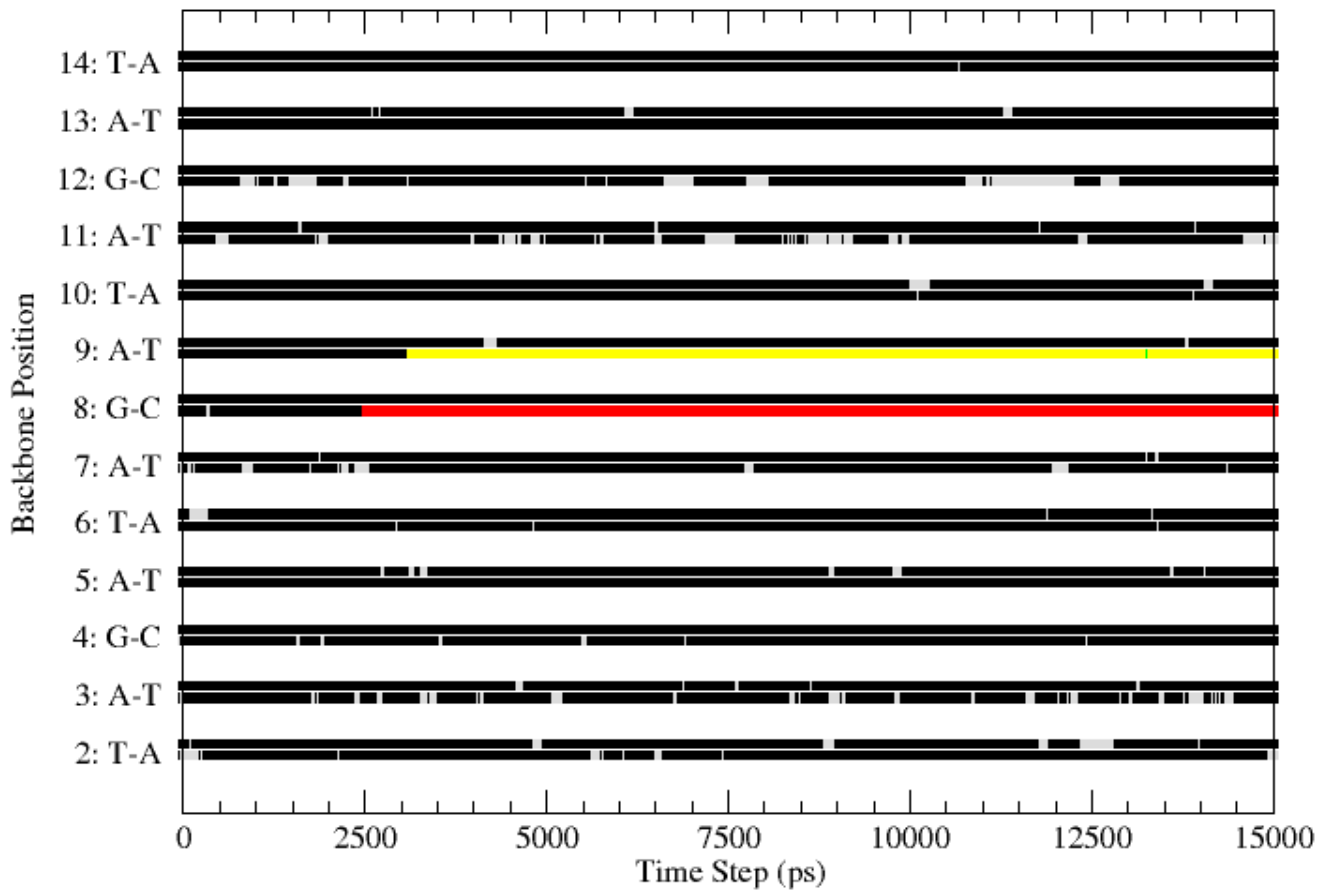

Black:  
State 1  
Red:  
State 2  
Green:  
State 3  
Blue:  
State 4  
Yellow:  
State 5  
Brown:  
State 6  
Grey:  
State 7

Color  
Code:

## 27: GTGT

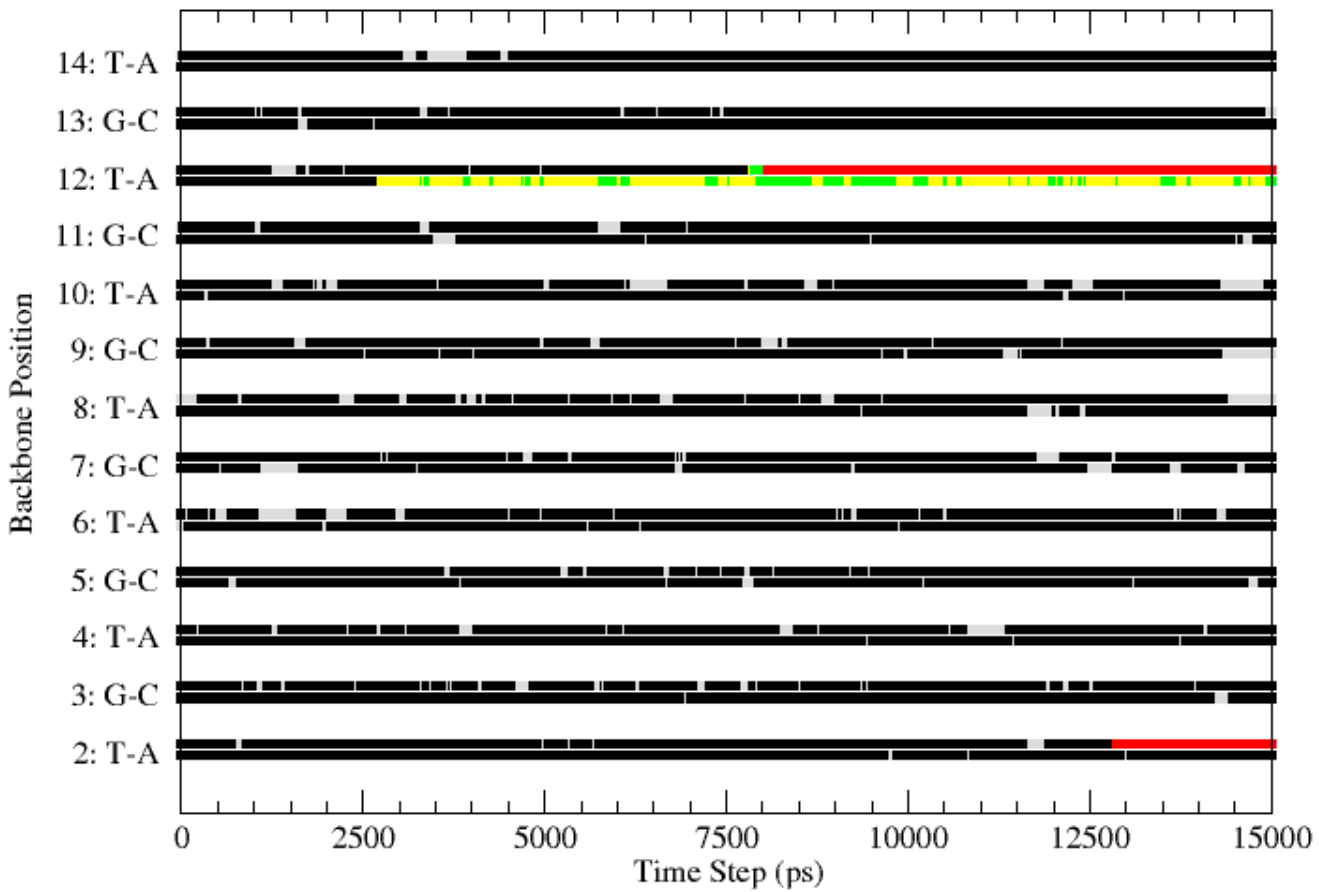

Black:  
State 1  
Red:  
State 2  
Green:  
State 3  
Blue:  
State 4  
Yellow:  
State 5  
Brown:  
State 6  
Grey:  
State 7

Color  
Code:



## 28: GGTT

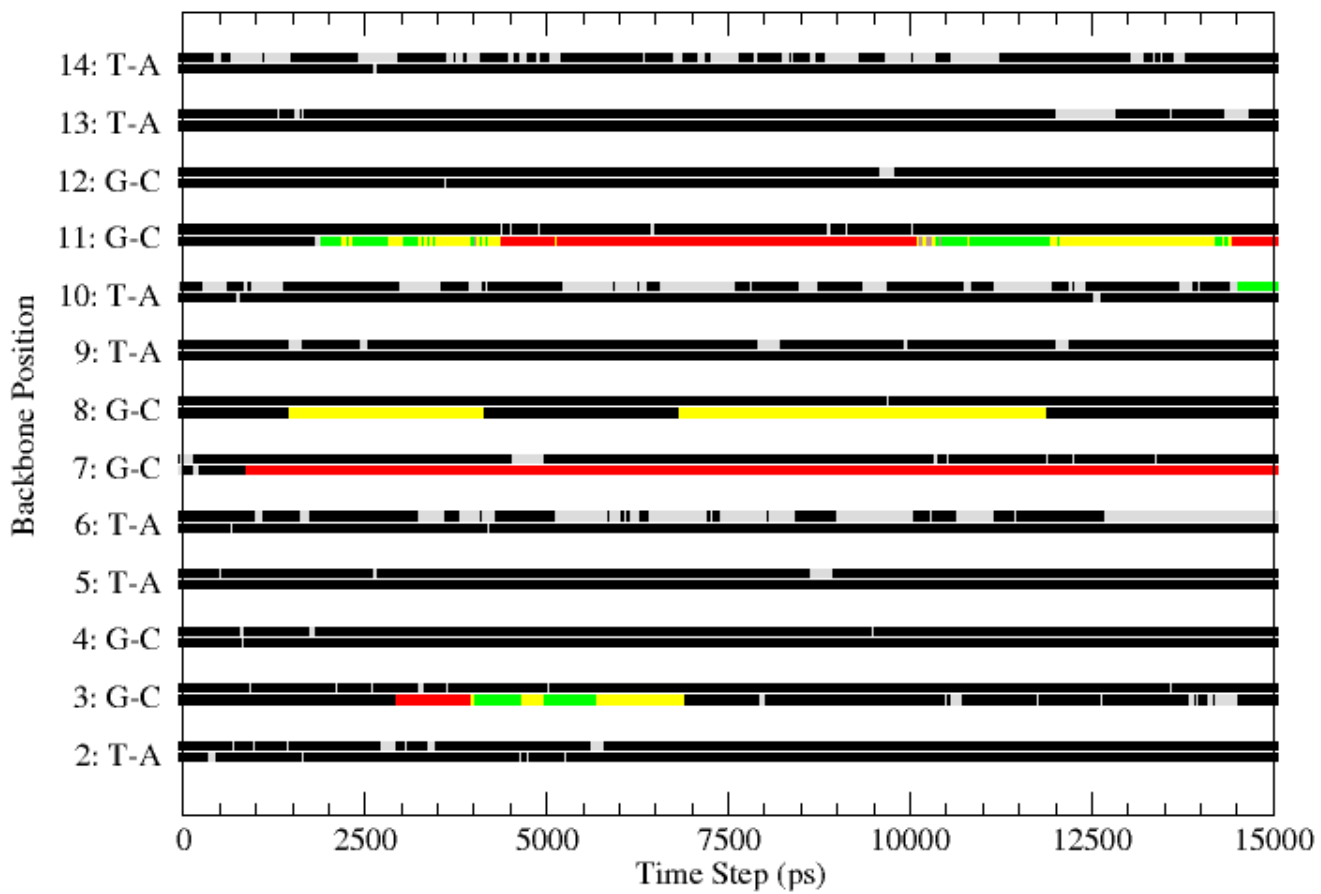

Black:  
State 1  
Red:  
State 2  
Green:  
State 3  
Blue:  
State 4  
Yellow:  
State 5  
Brown:  
State 6  
Grey:  
State 7

Color  
Code:

## 29: AACG

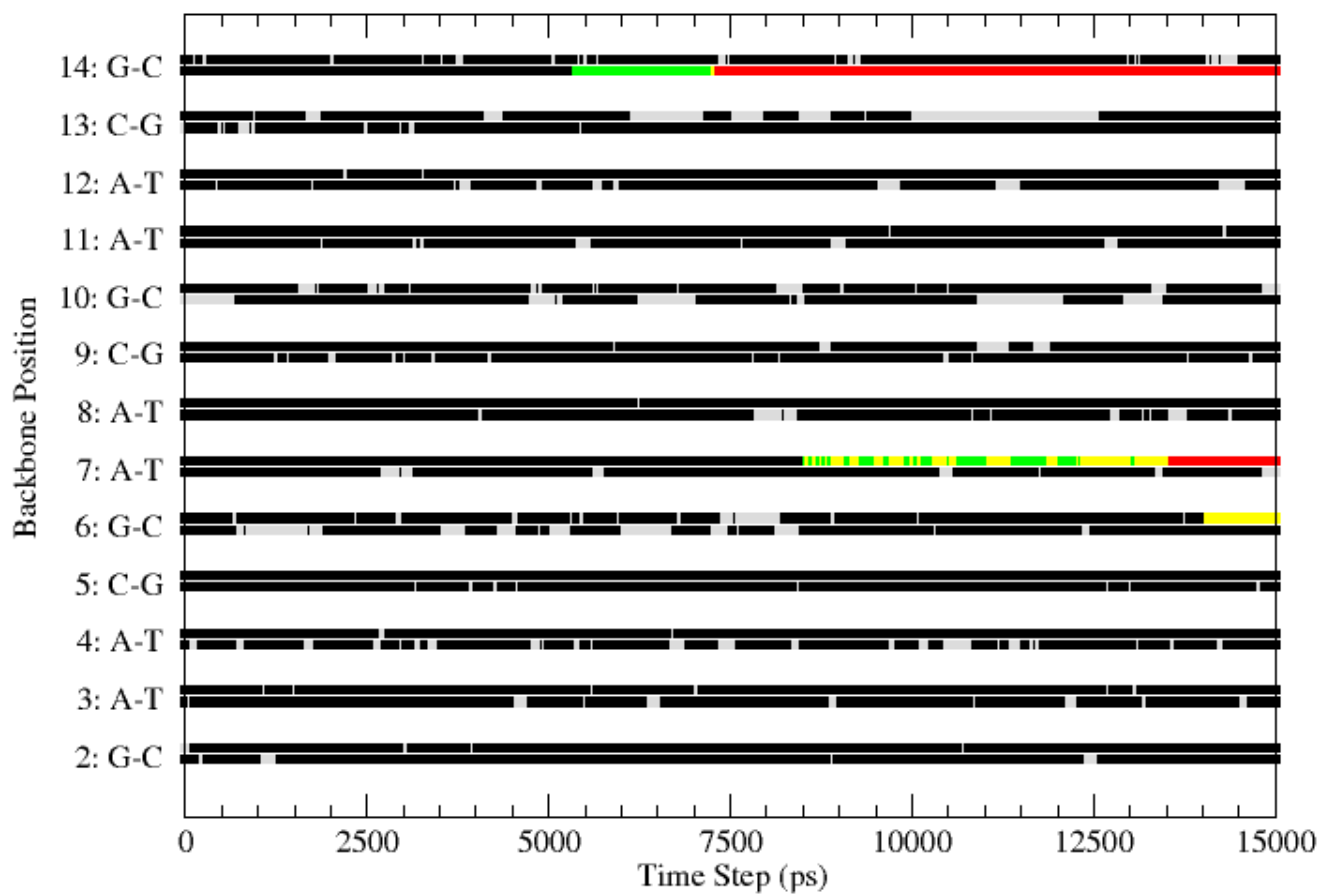

Black:  
State 1  
Red:  
State 2  
Green:  
State 3  
Blue:  
State 4  
Yellow:  
State 5  
Brown:  
State 6  
Grey:  
State 7

Color  
Code:

## 30: ACAG

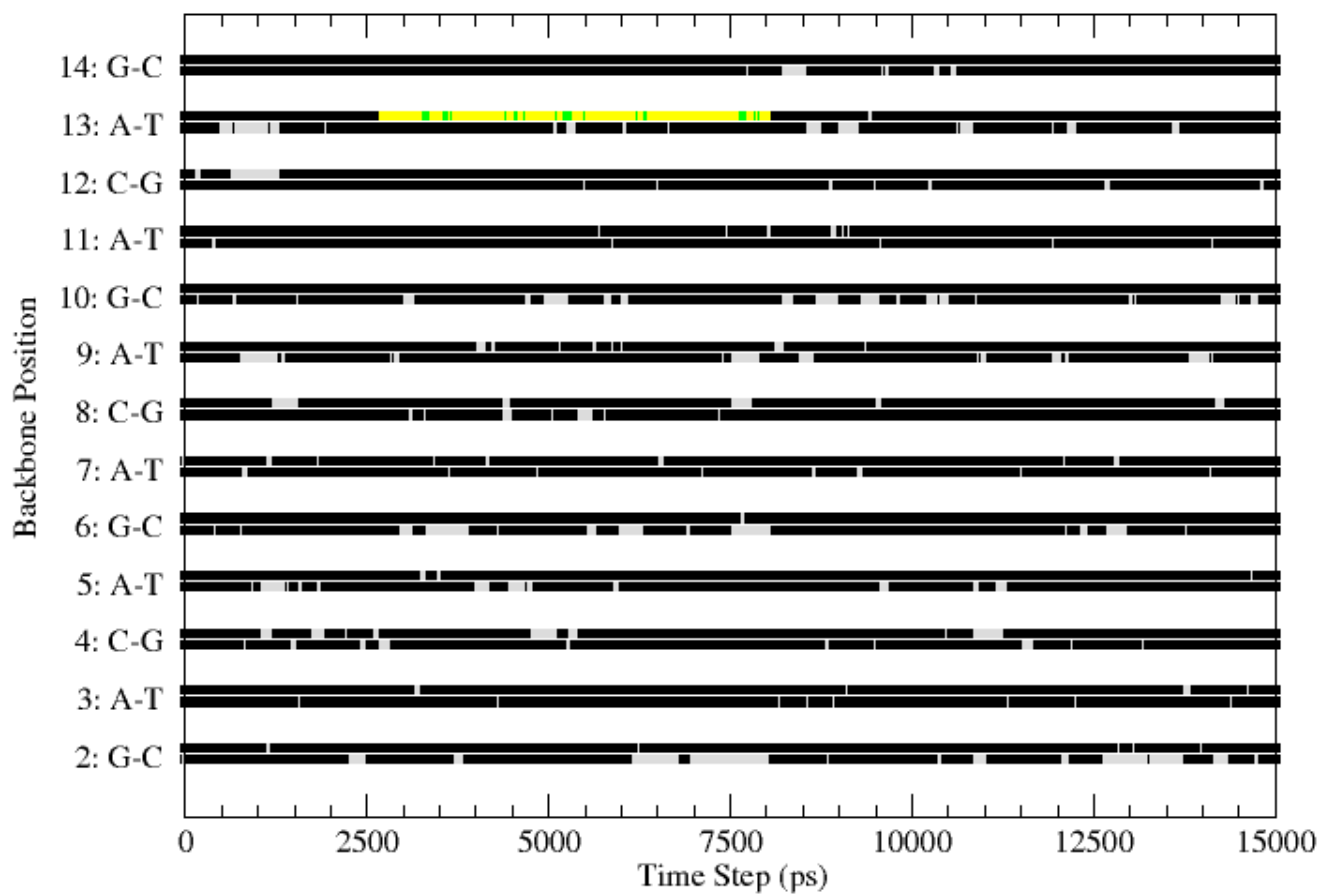

Black:  
State 1  
Red:  
State 2  
Green:  
State 3  
Blue:  
State 4  
Yellow:  
State 5  
Brown:  
State 6  
Grey:  
State 7

Color  
Code:

## 31: GGGA

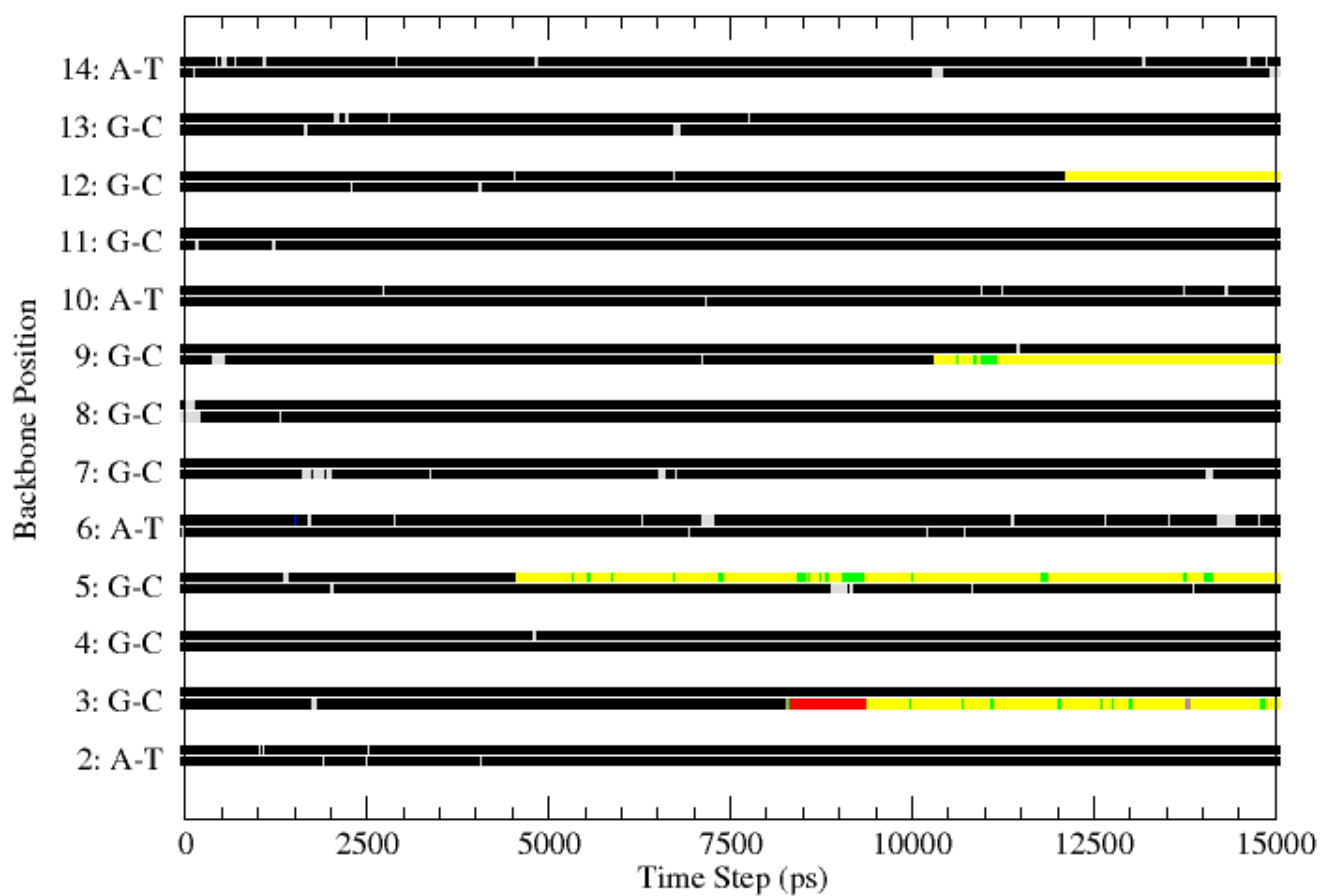

Black:  
State 1  
Red:  
State 2  
Green:  
State 3  
Blue:  
State 4  
Yellow:  
State 5  
Brown:  
State 6  
Grey:  
State 7

Color  
Code:

## 32: AATT

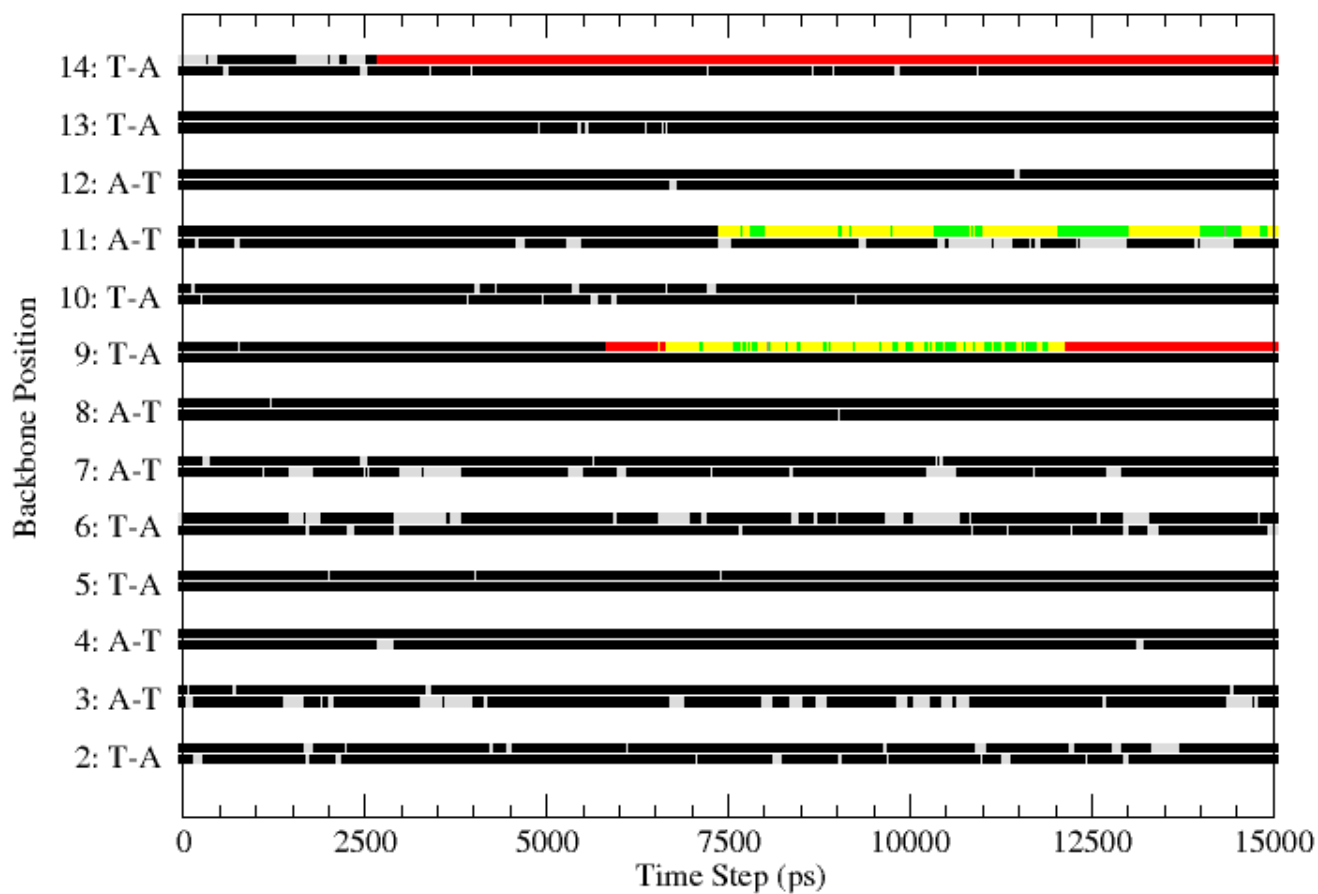

Black:  
State 1  
Red:  
State 2  
Green:  
State 3  
Blue:  
State 4  
Yellow:  
State 5  
Brown:  
State 6  
Grey:  
State 7

Color  
Code:

## 33: AACT

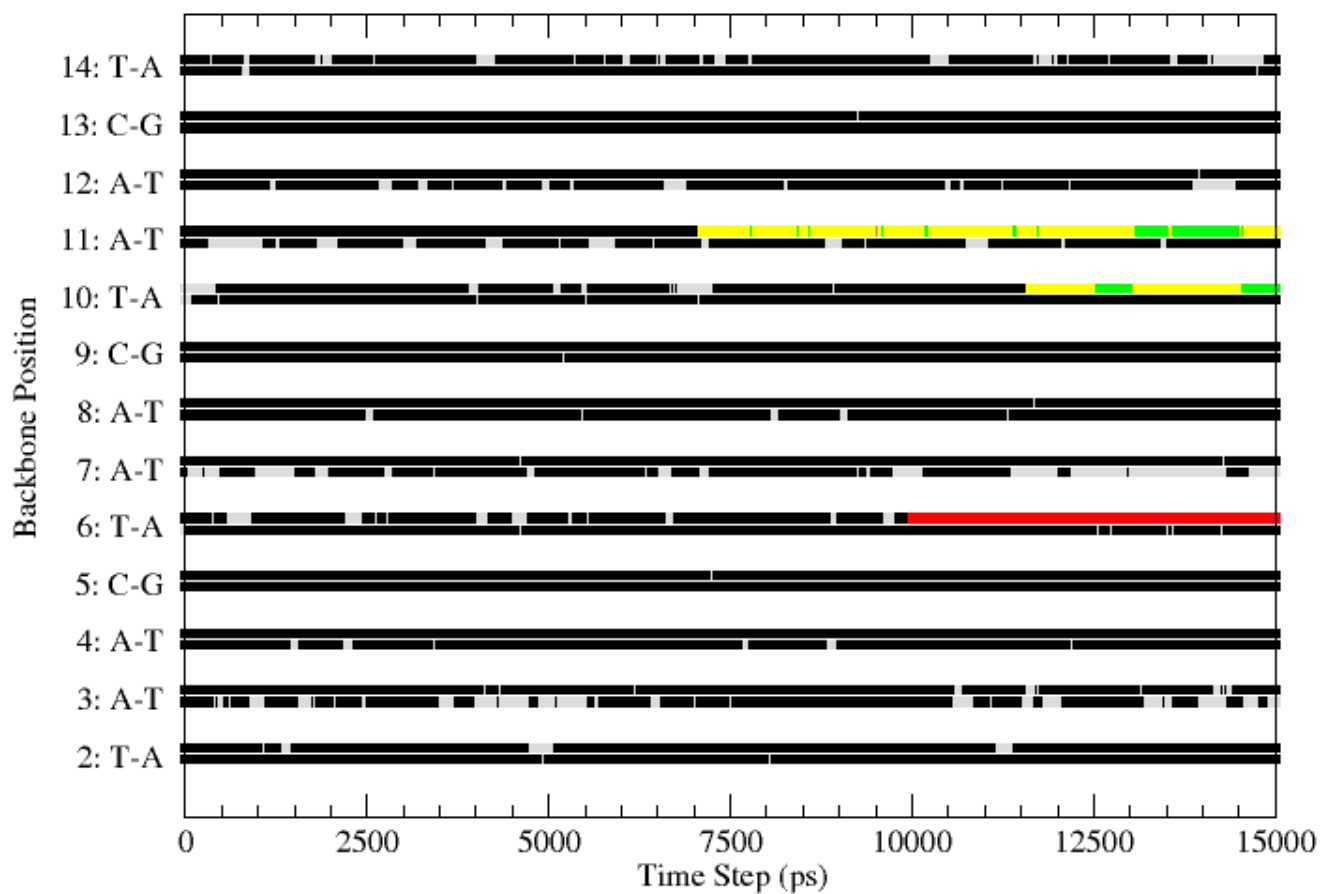

Black:  
State 1  
Red:  
State 2  
Green:  
State 3  
Blue:  
State 4  
Yellow:  
State 5  
Brown:  
State 6  
Grey:  
State 7

Color  
Code:

## 34: ACAT

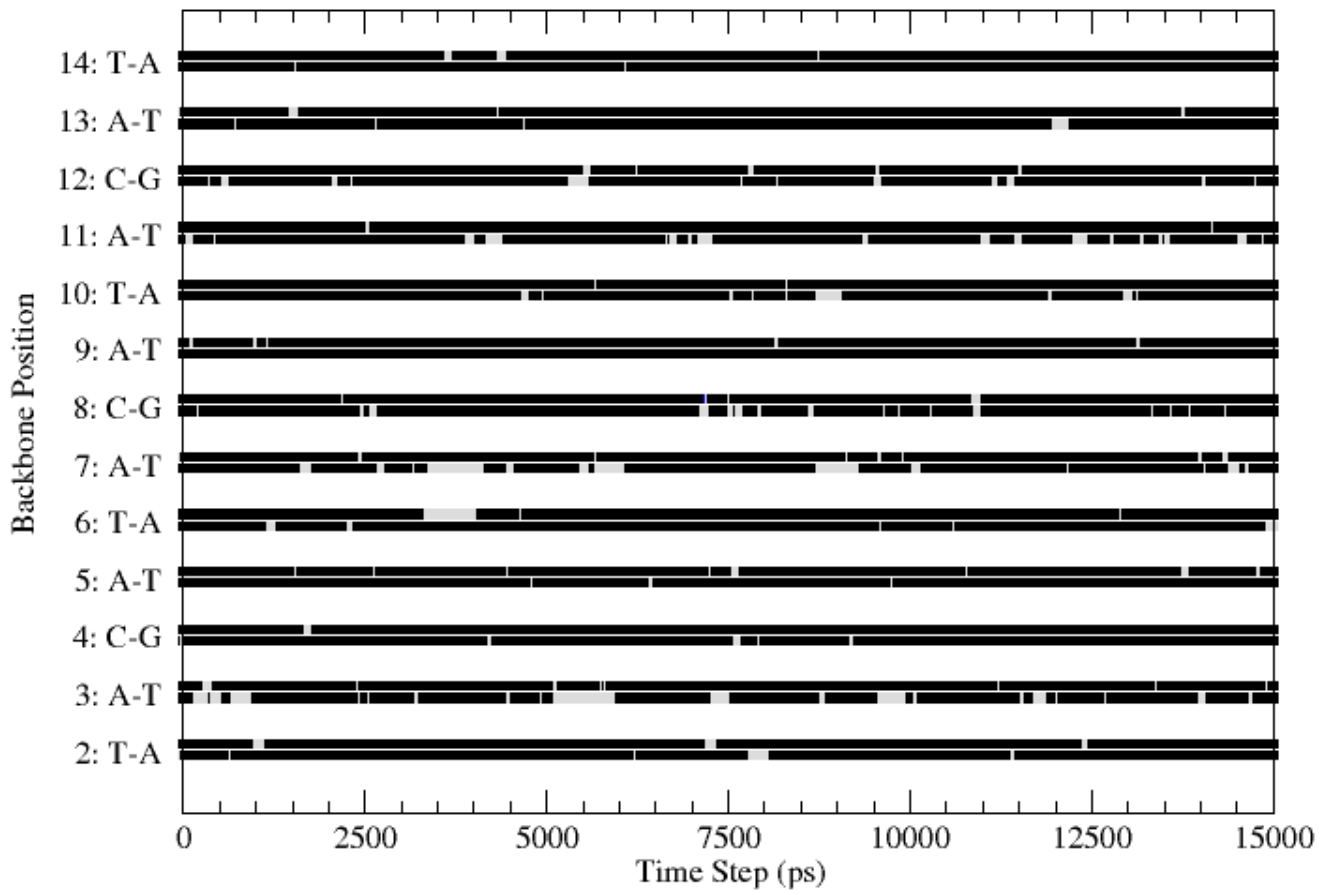

Black:  
State 1  
Red:  
State 2  
Green:  
State 3  
Blue:  
State 4  
Yellow:  
State 5  
Brown:  
State 6  
Grey:  
State 7

Color  
Code:

## 35: GGGC

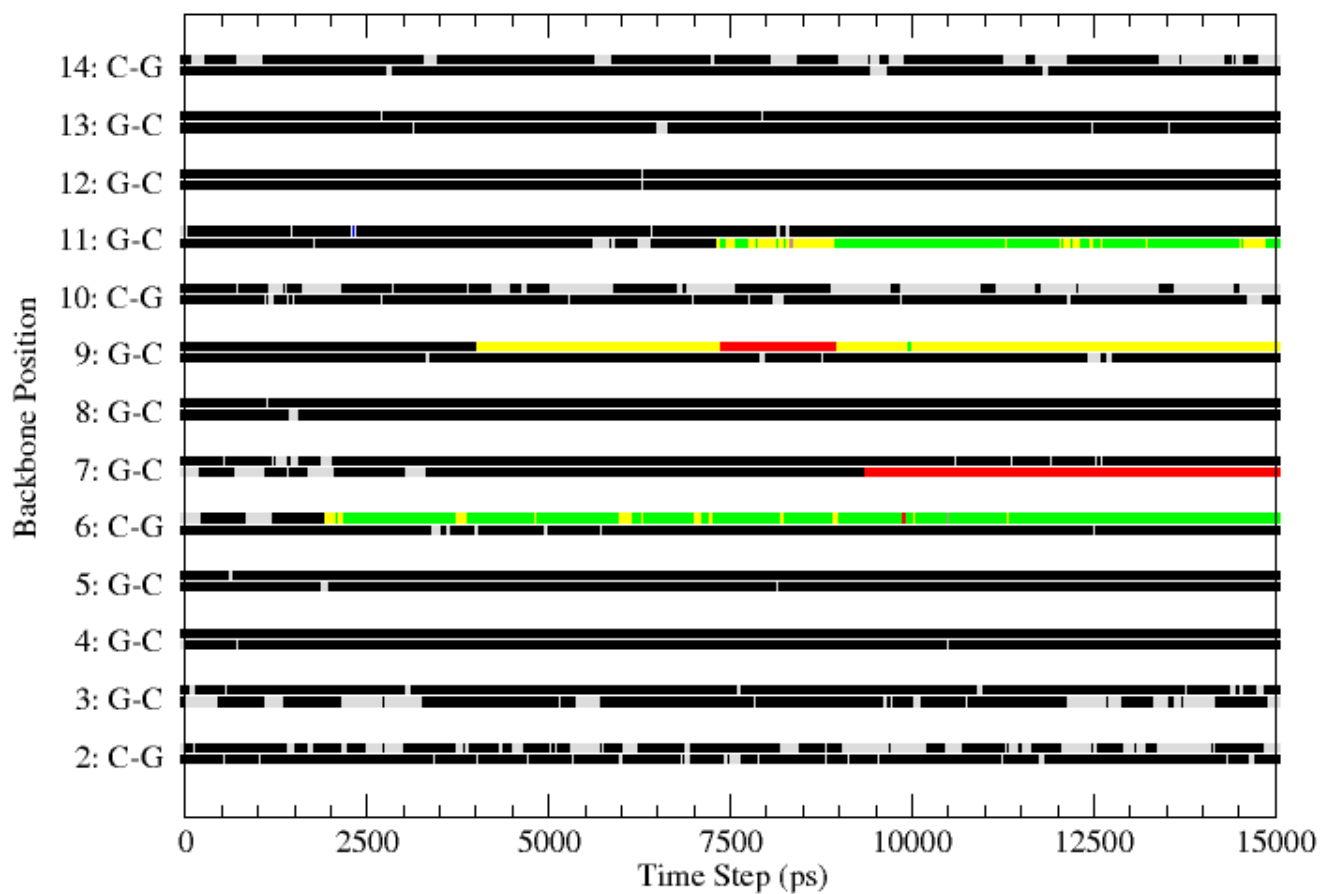

Black:  
State 1  
Red:  
State 2  
Green:  
State 3  
Blue:  
State 4  
Yellow:  
State 5  
Brown:  
State 6  
Grey:  
State  
7

Color  
Code:





## 37: AATC

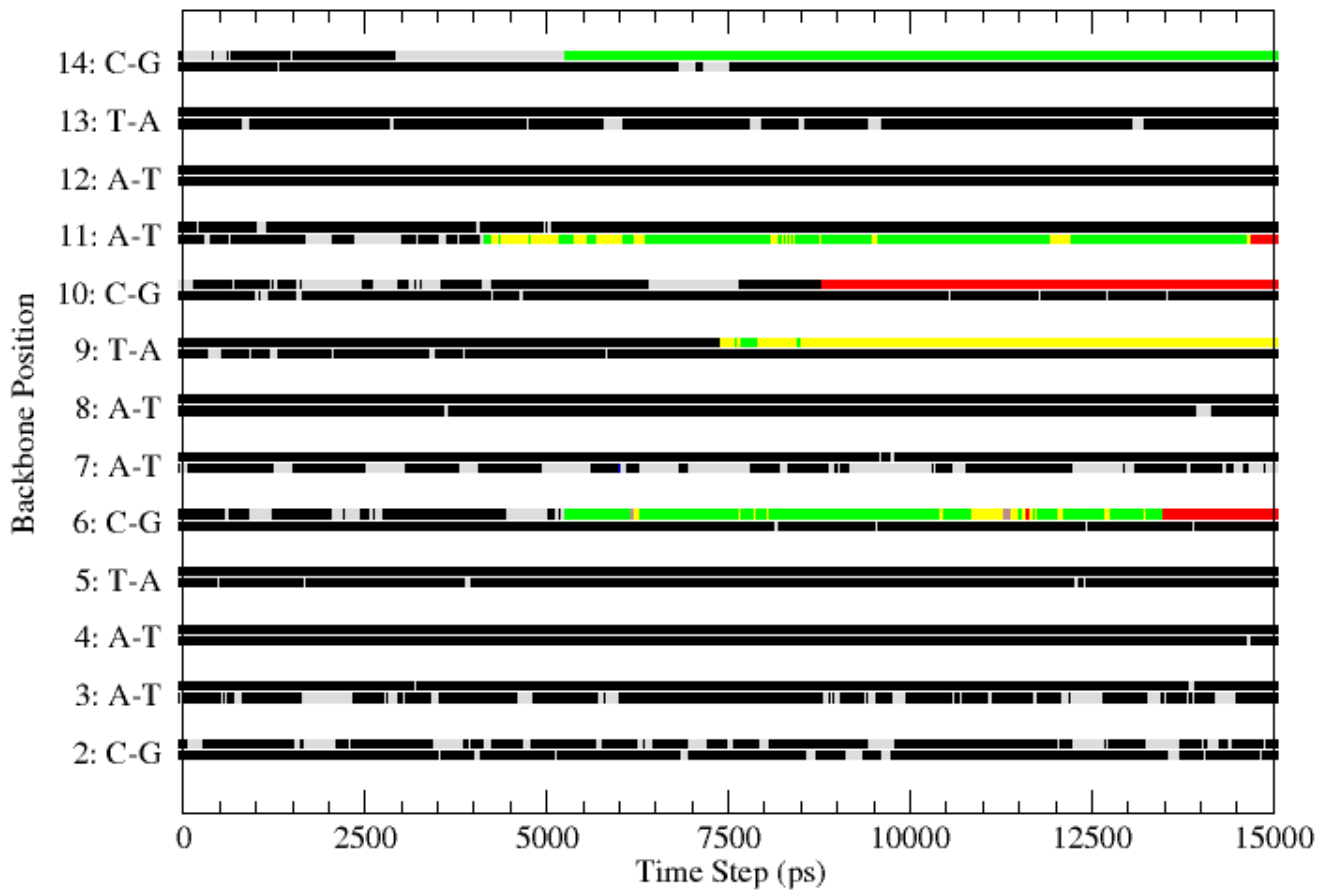

Black:  
State 1  
Red:  
State 2  
Green:  
State 3  
Blue:  
State 4  
Yellow:  
State 5  
Brown:  
State 6  
Grey:  
State 7

Color  
Code:

## 38: GCTA

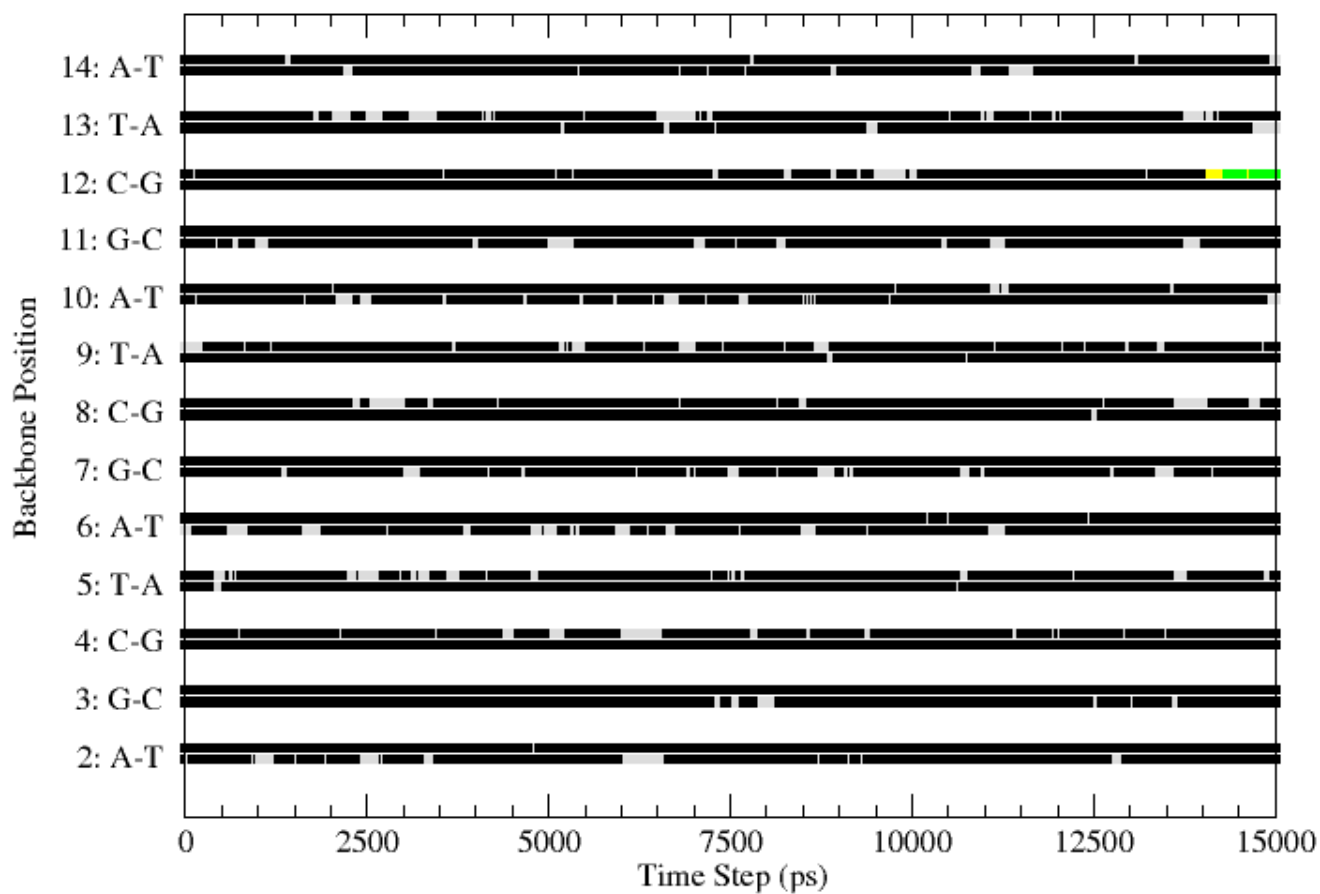

Color  
Code:

## 39: GGGT

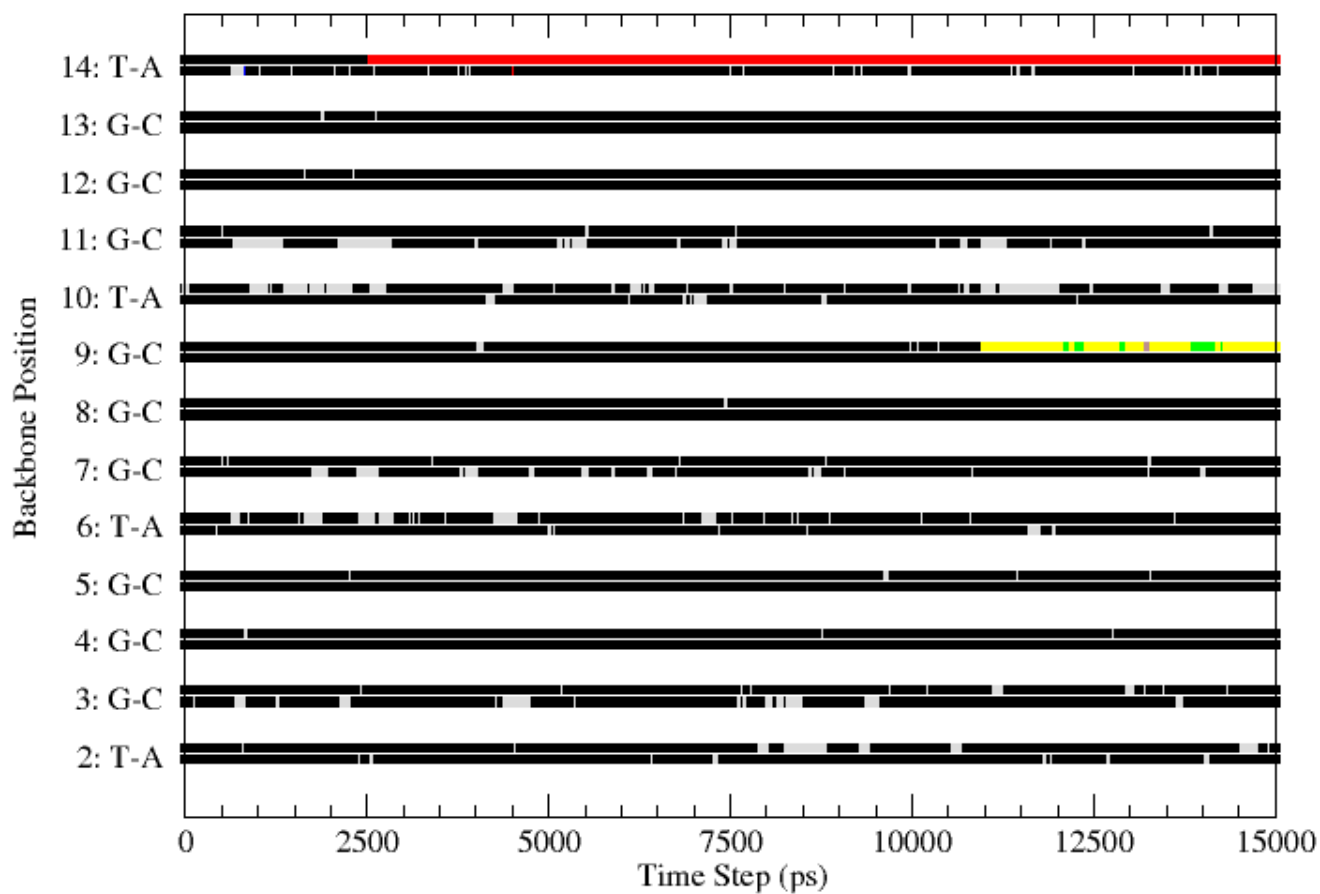

Black:  
State 1  
Red:  
State 2  
Green:  
State 3  
Blue:  
State 4  
Yellow:  
State 5  
Brown:  
State 6  
Grey:  
State 7

Color  
Code:

## 40: GGCA

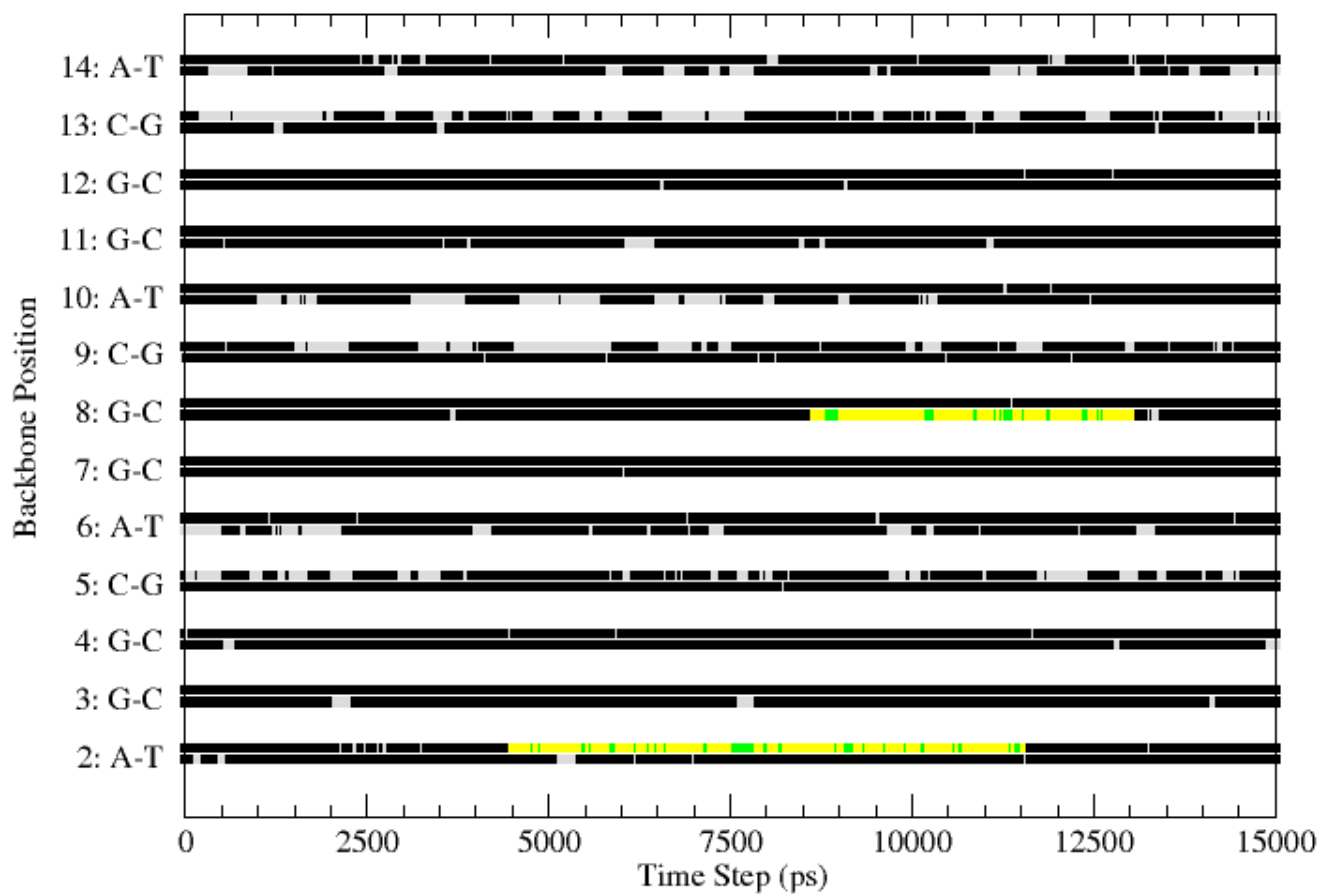

Black:  
State 1  
Red:  
State 2  
Green:  
State 3  
Blue:  
State 4  
Yellow:  
State 5  
Brown:  
State 6  
Grey:  
State 7

Color  
Code:

## 41: AAGT

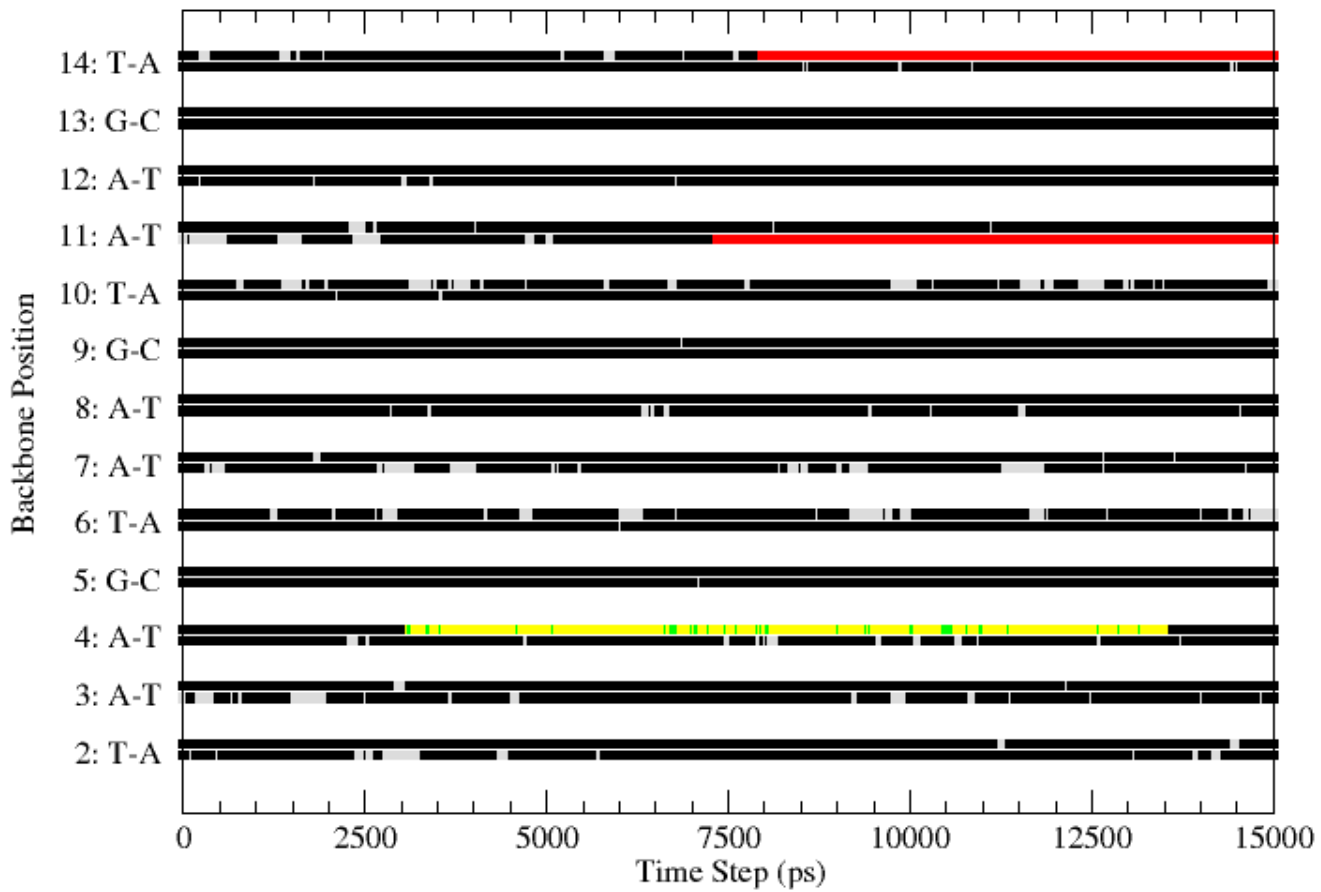

Black:  
State 1  
Red:  
State 2  
Green:  
State 3  
Blue:  
State 4  
Yellow:  
State 5  
Brown:  
State 6  
Grey:  
State 7

Color  
Code:

## 42: GCAT

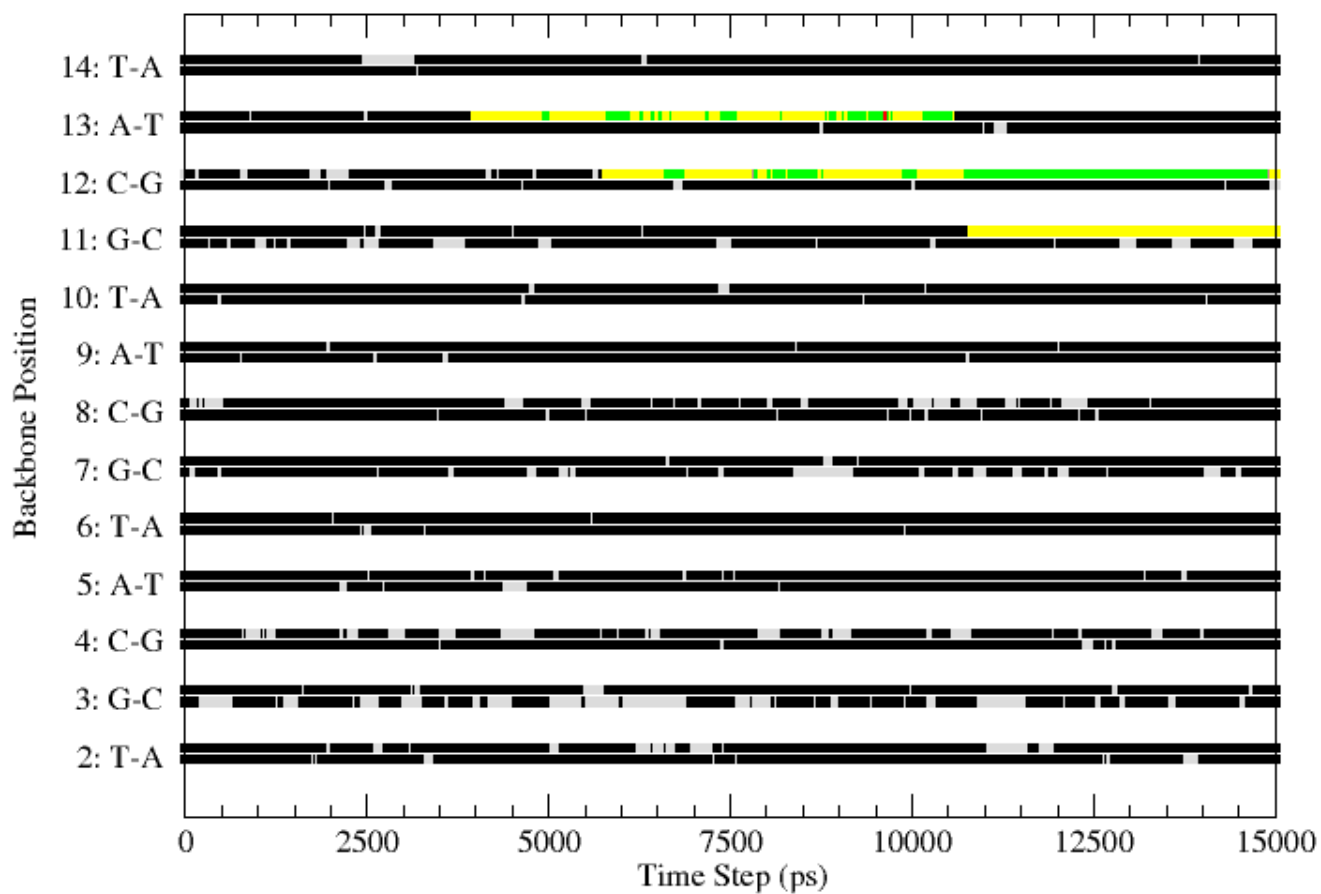

Black:  
State 1  
Red:  
State 2  
Green:  
State 3  
Blue:  
State 4  
Yellow:  
State 5  
Brown:  
State 6  
Grey:  
State 7
