# Supplementary material
Source: PubMed Central journal article supplement (PMC1366942)

Classification of backbone dihedral angles in MD simulated structures of DNA.

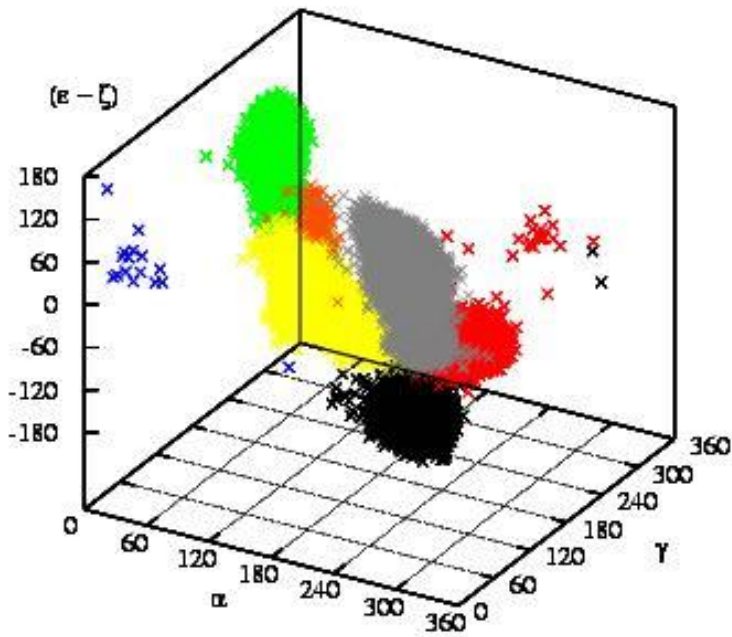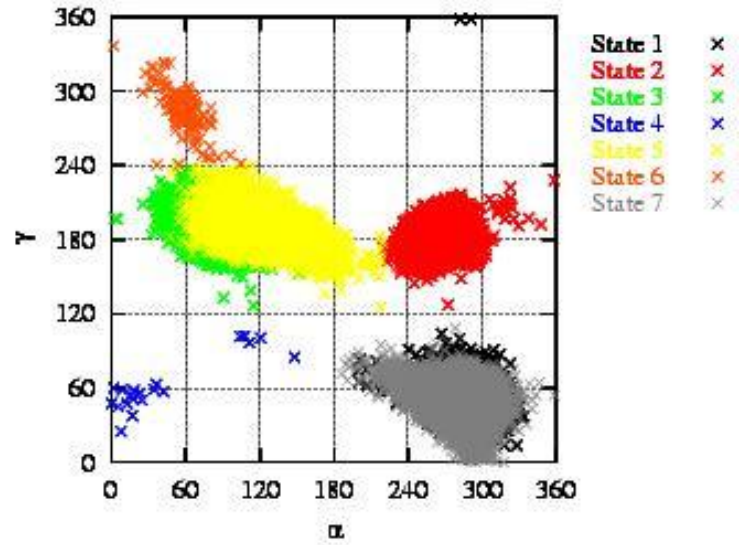

Supplement: biophysj_105.067397_1.pdf [file biophysj_105.067397_1.pdf]

Difference in sugar pucker attached to different bases in the ABC MD Database.

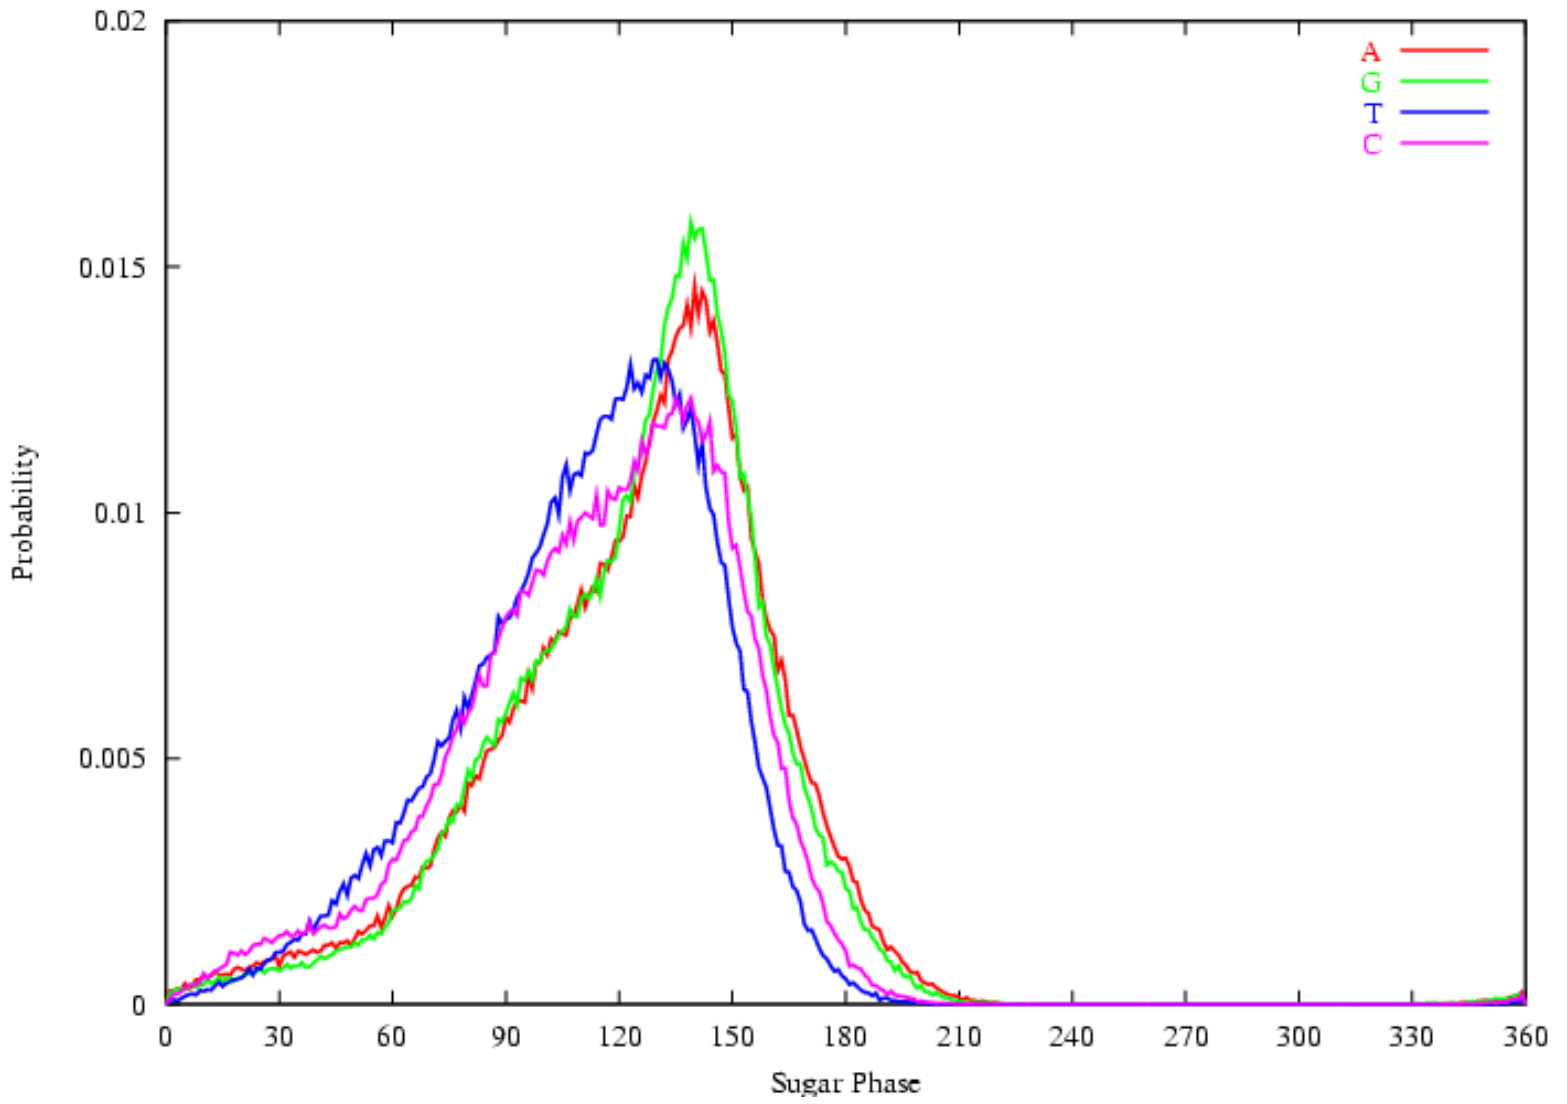

Supplement: biophysj_105.067397_2.pdf [file biophysj_105.067397_2.pdf]

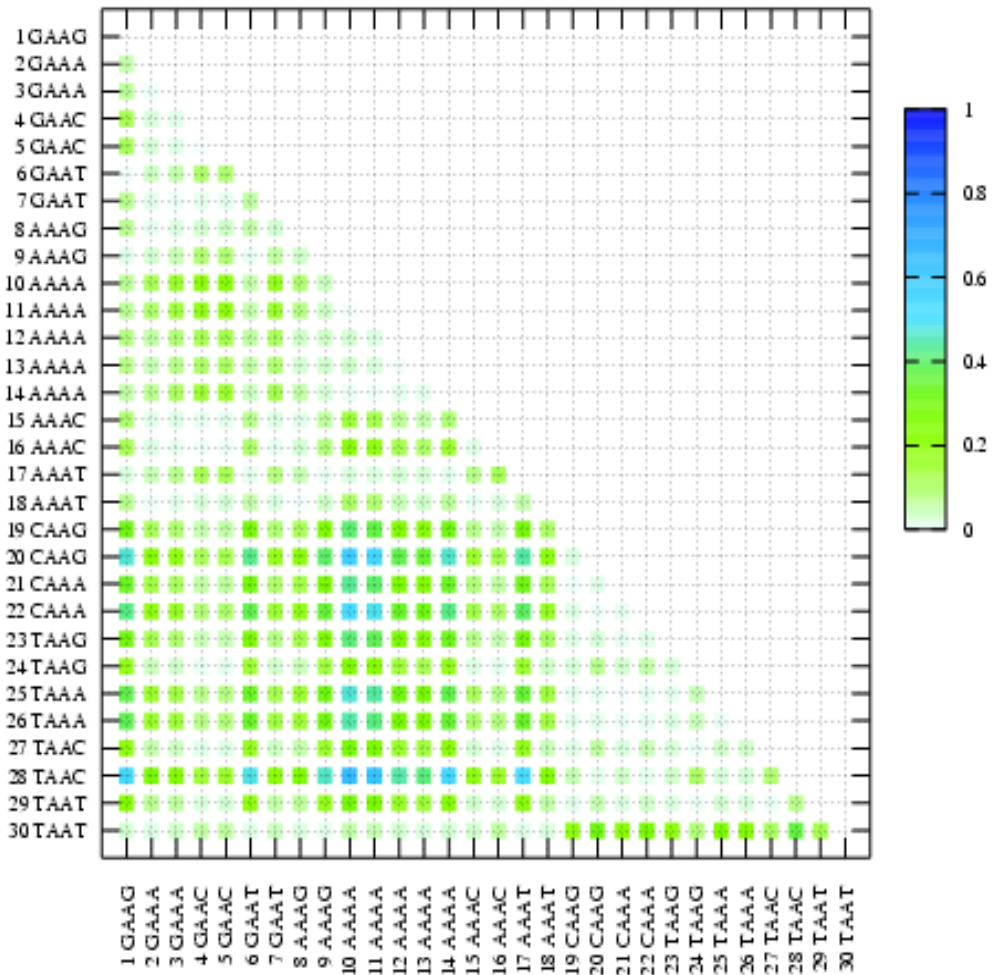

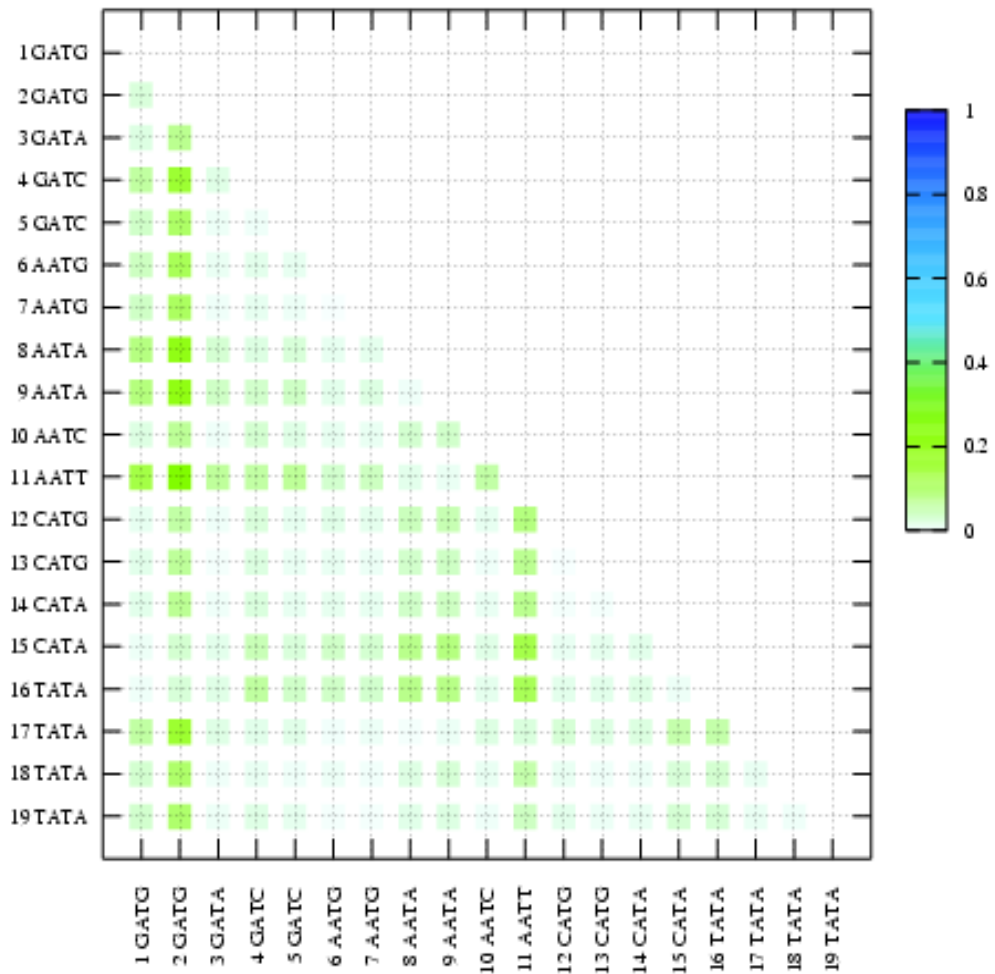

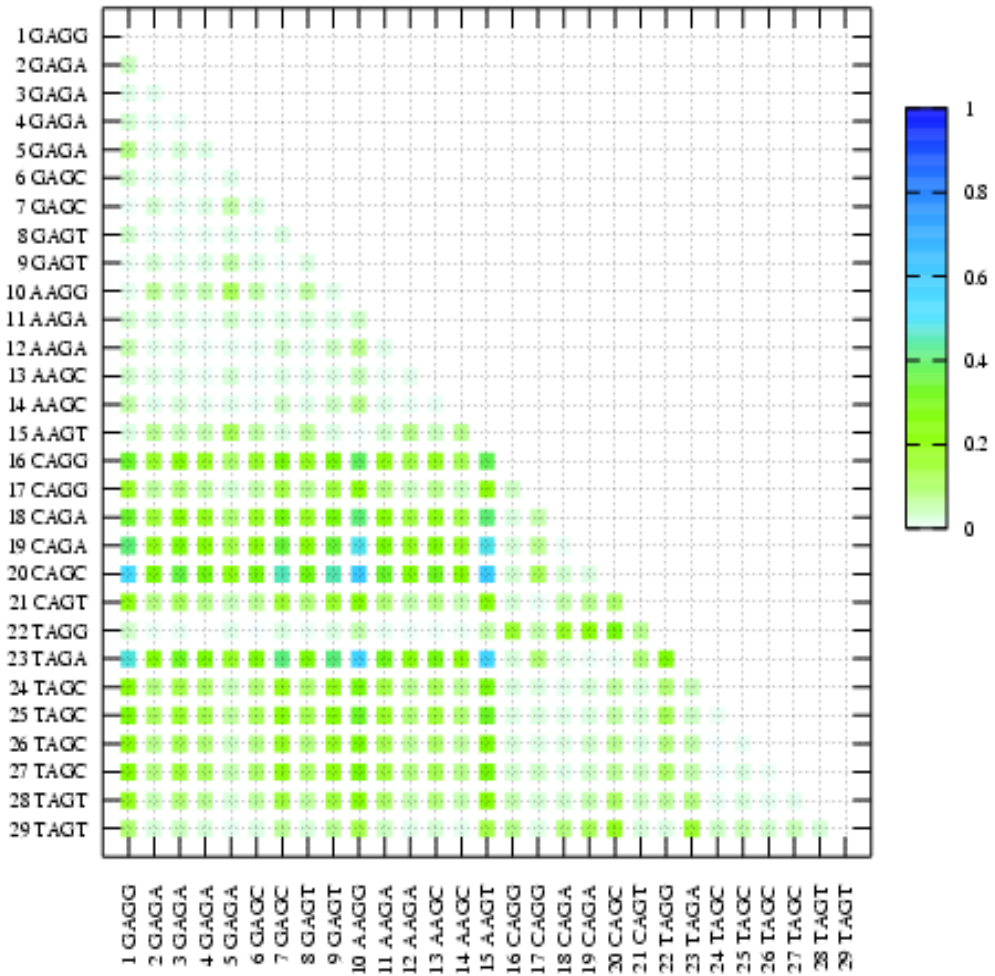

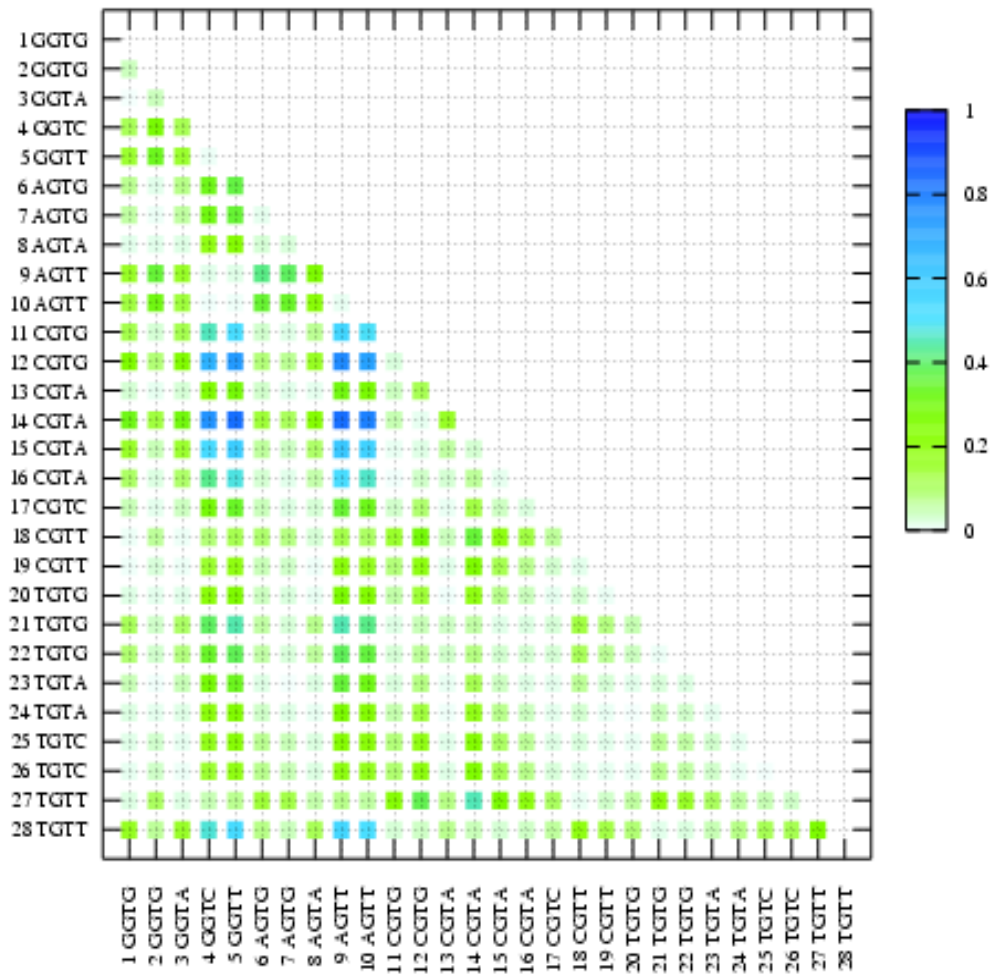

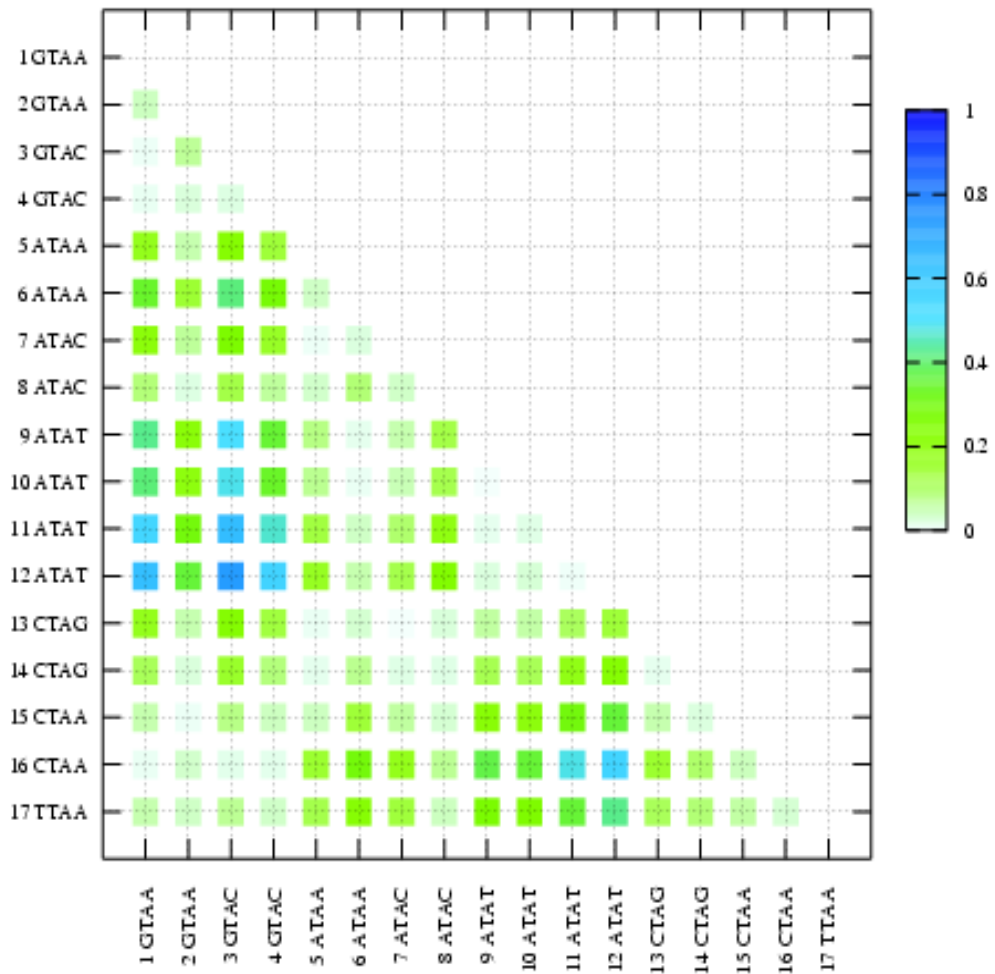

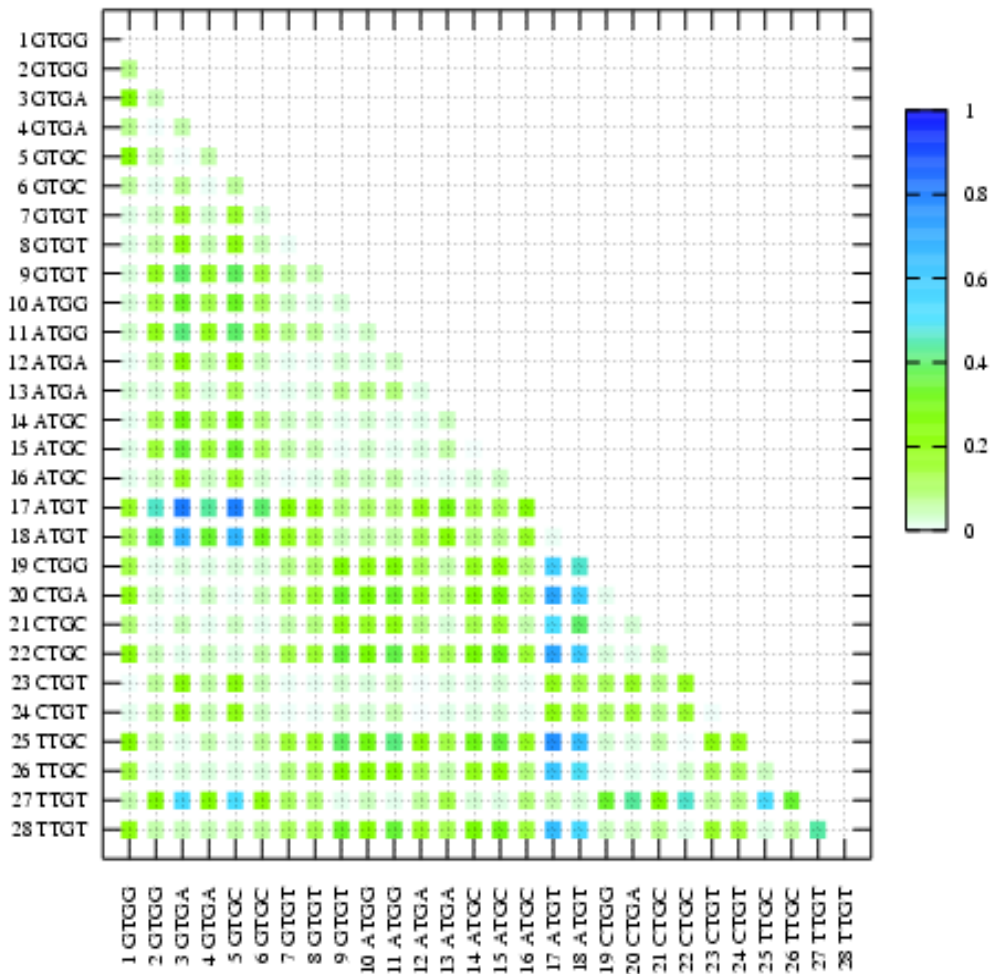

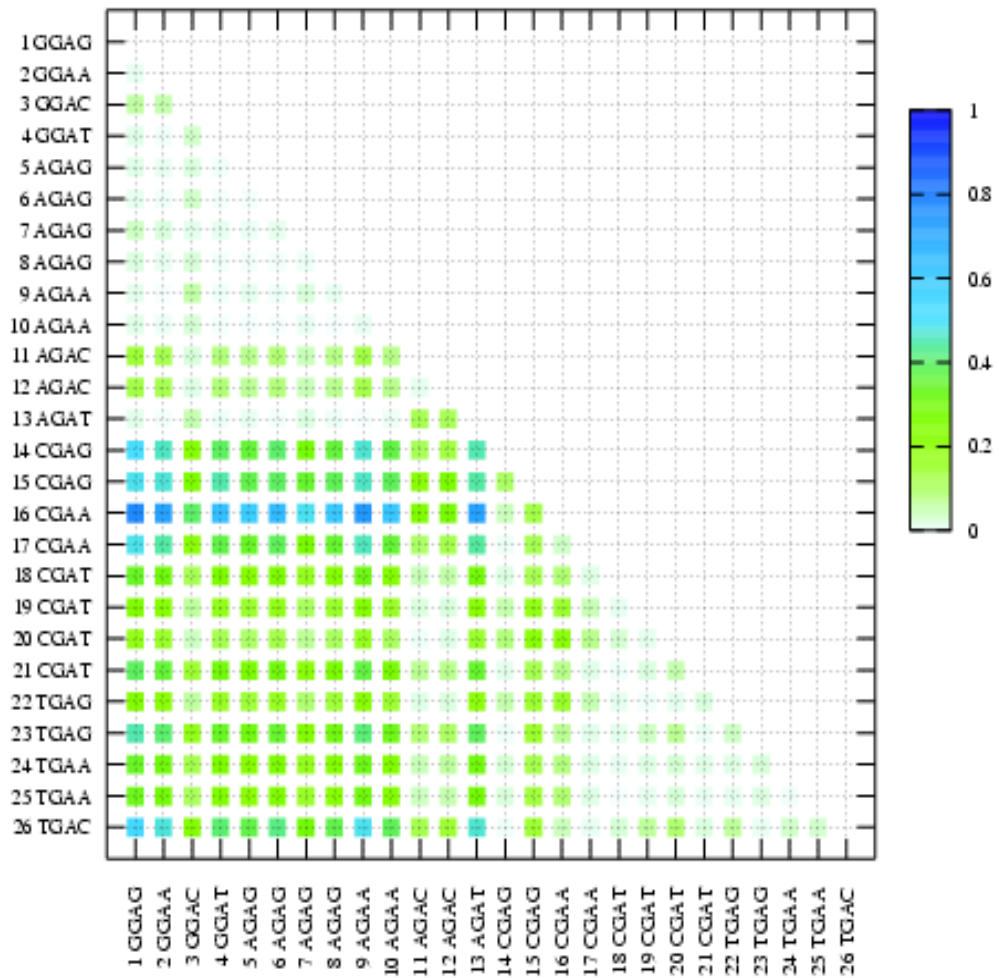

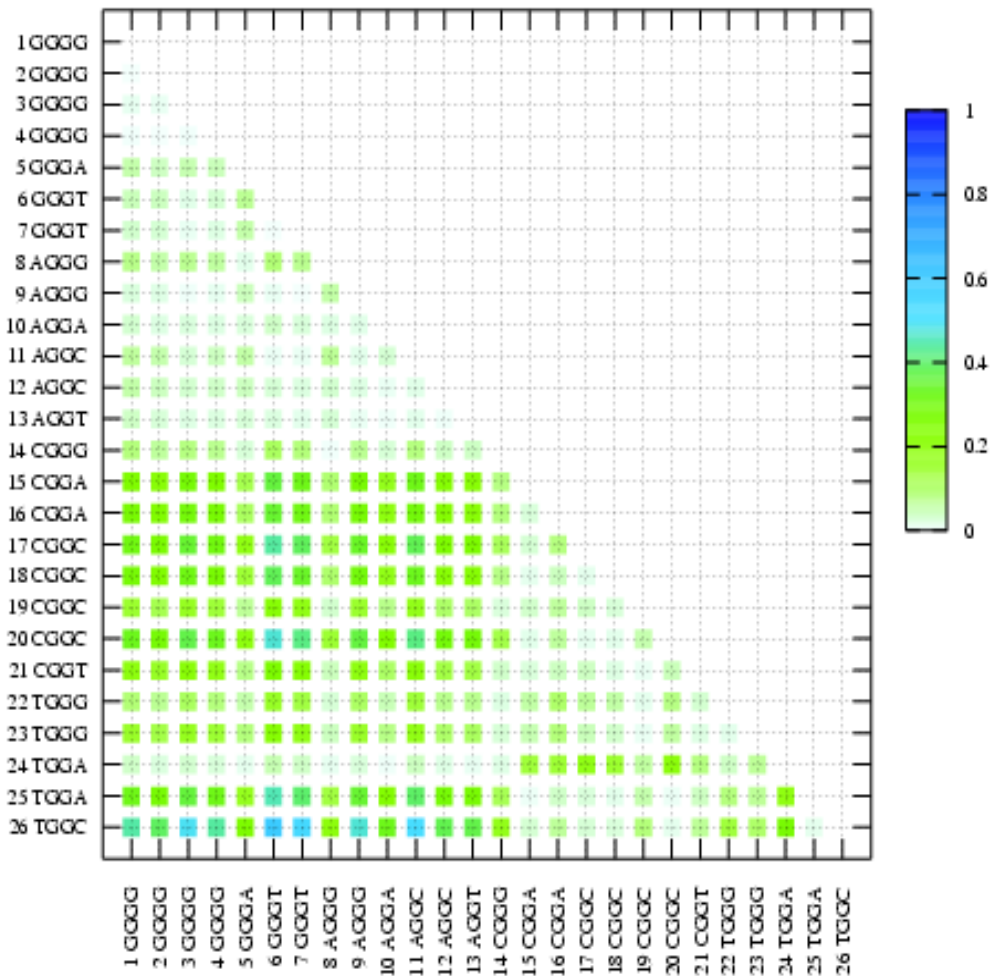



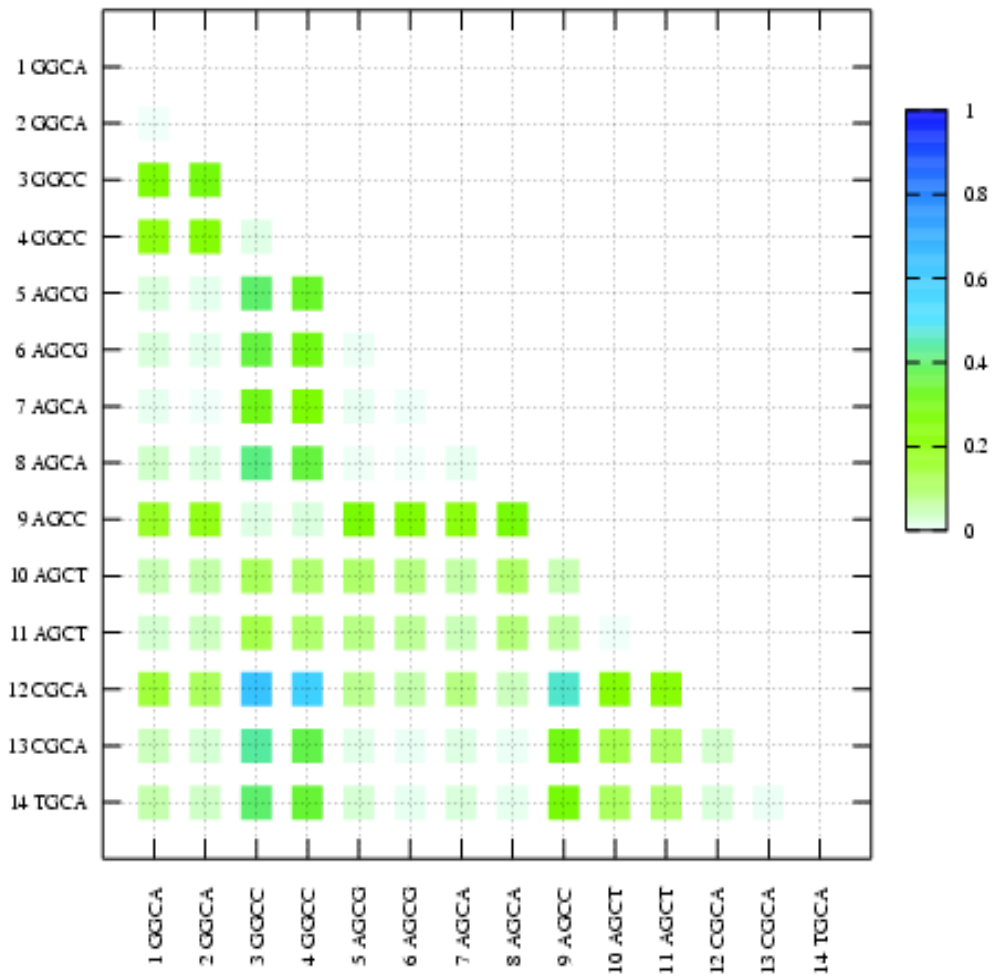

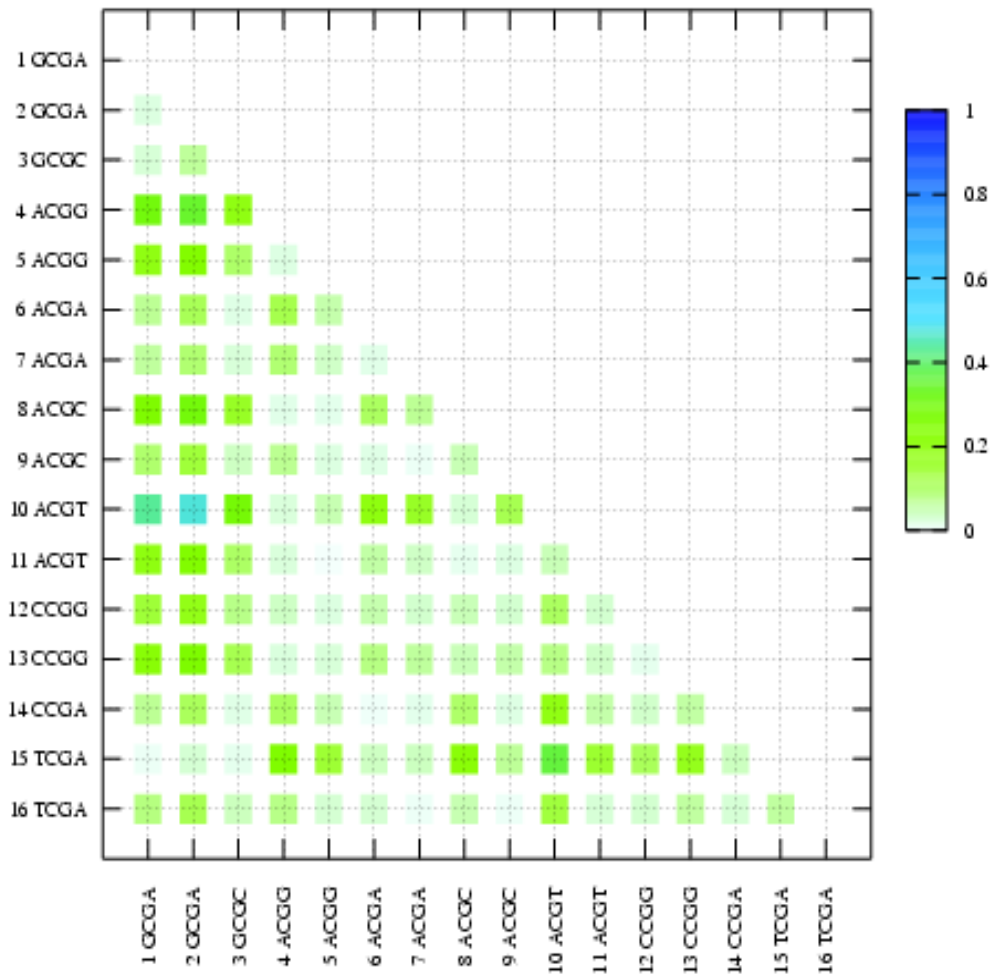

Supplement: biophysj_105.067397_6.pdf [file biophysj_105.067397_6.pdf]

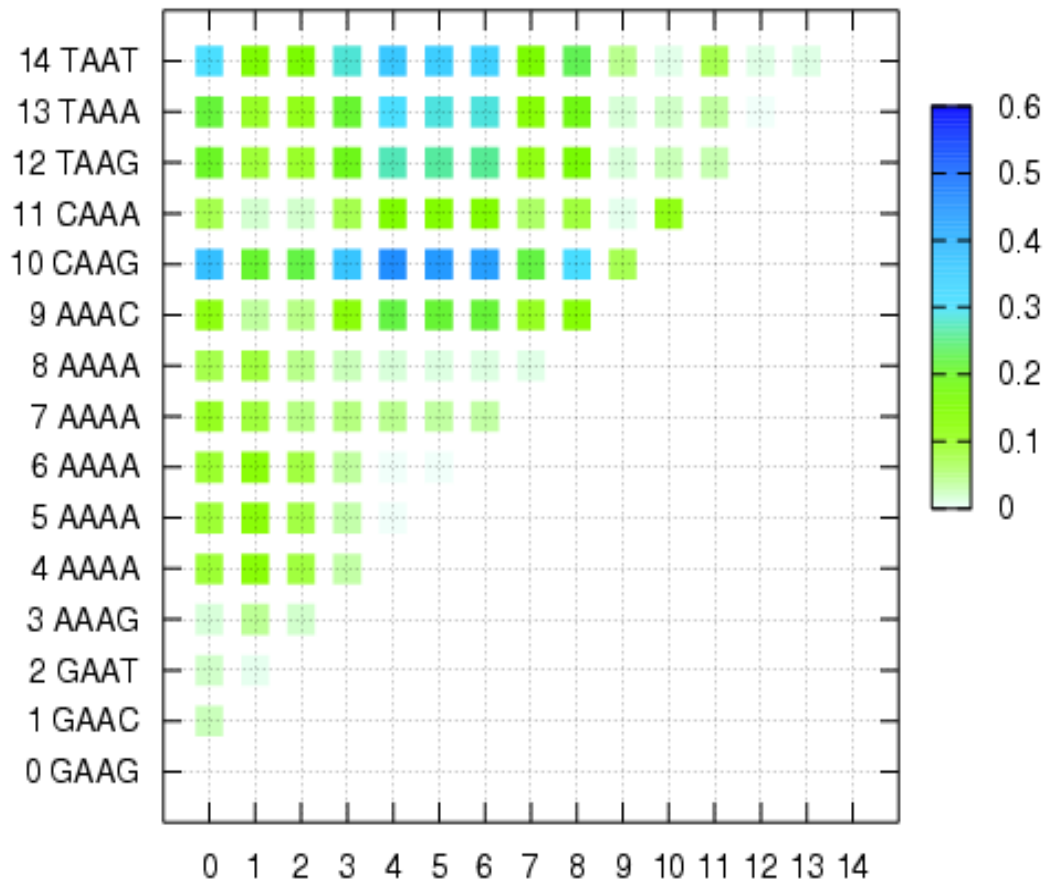

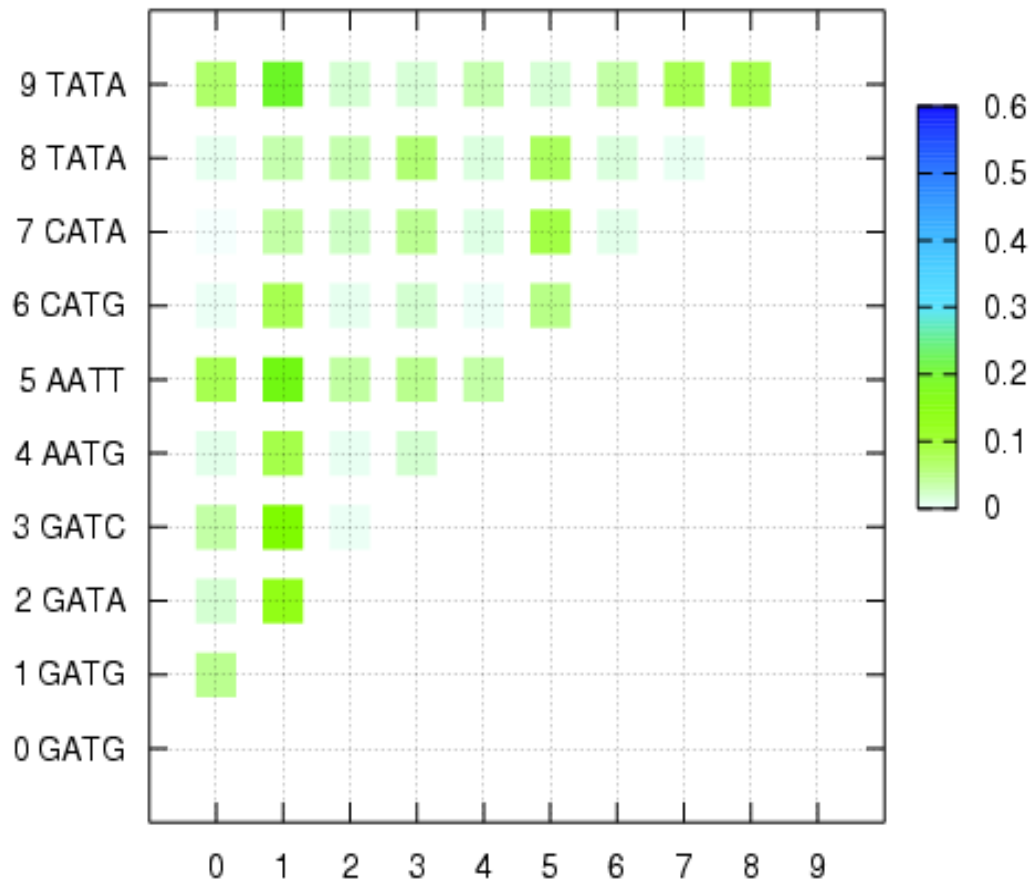

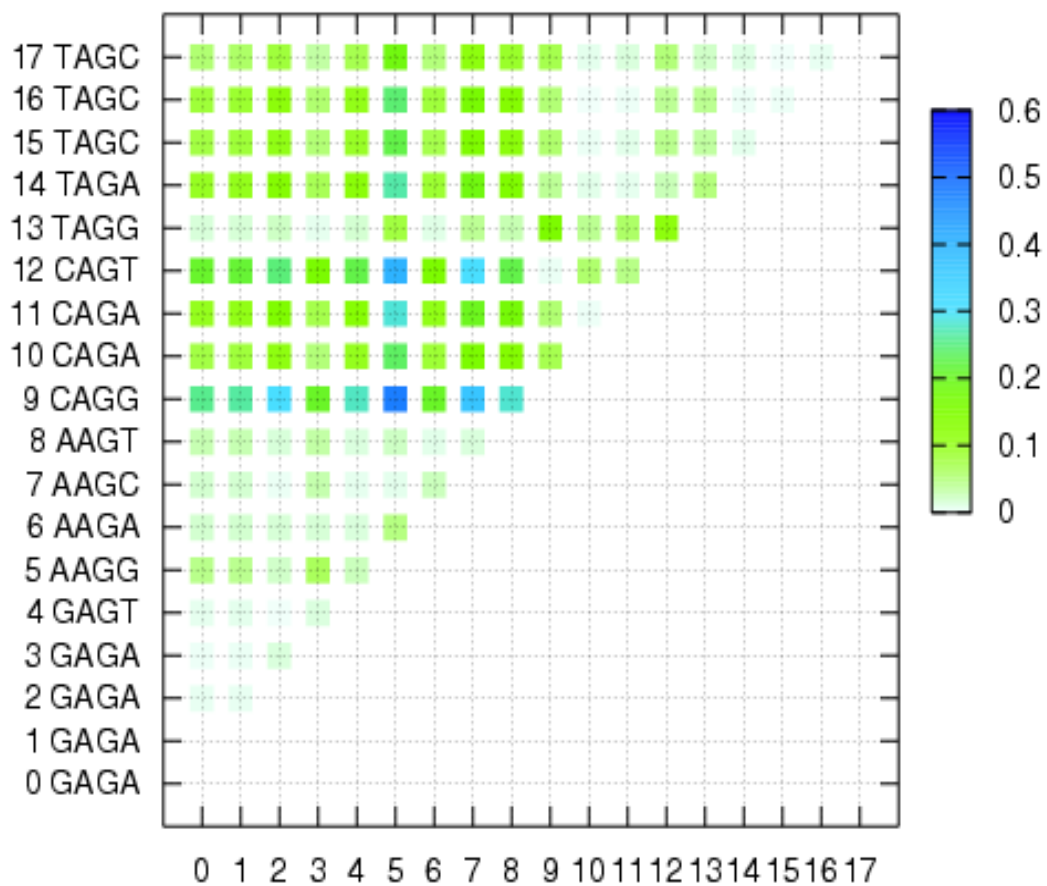

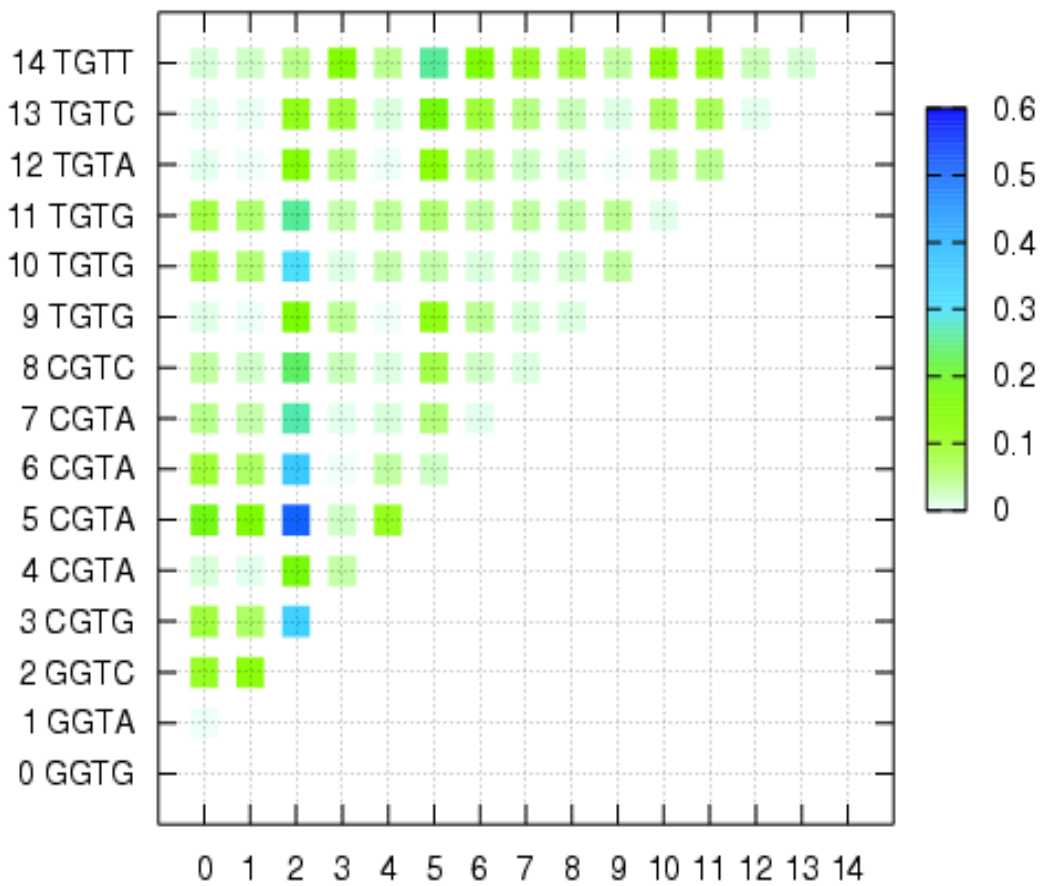

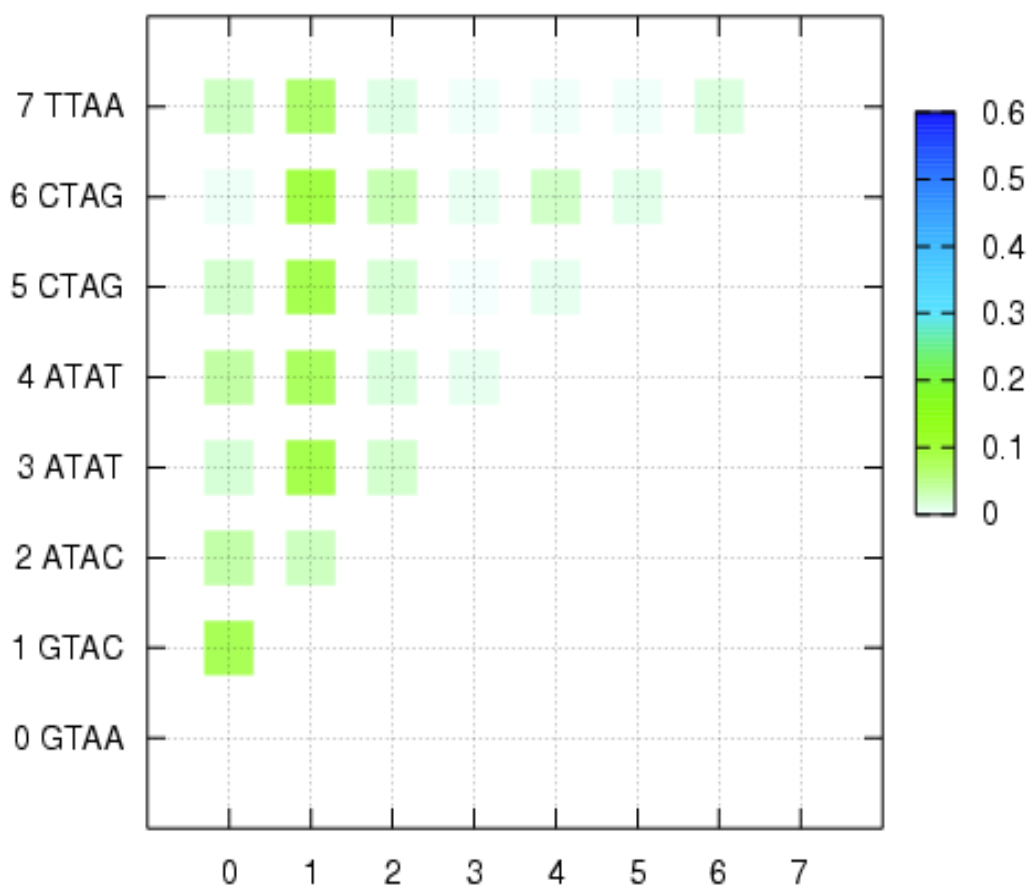

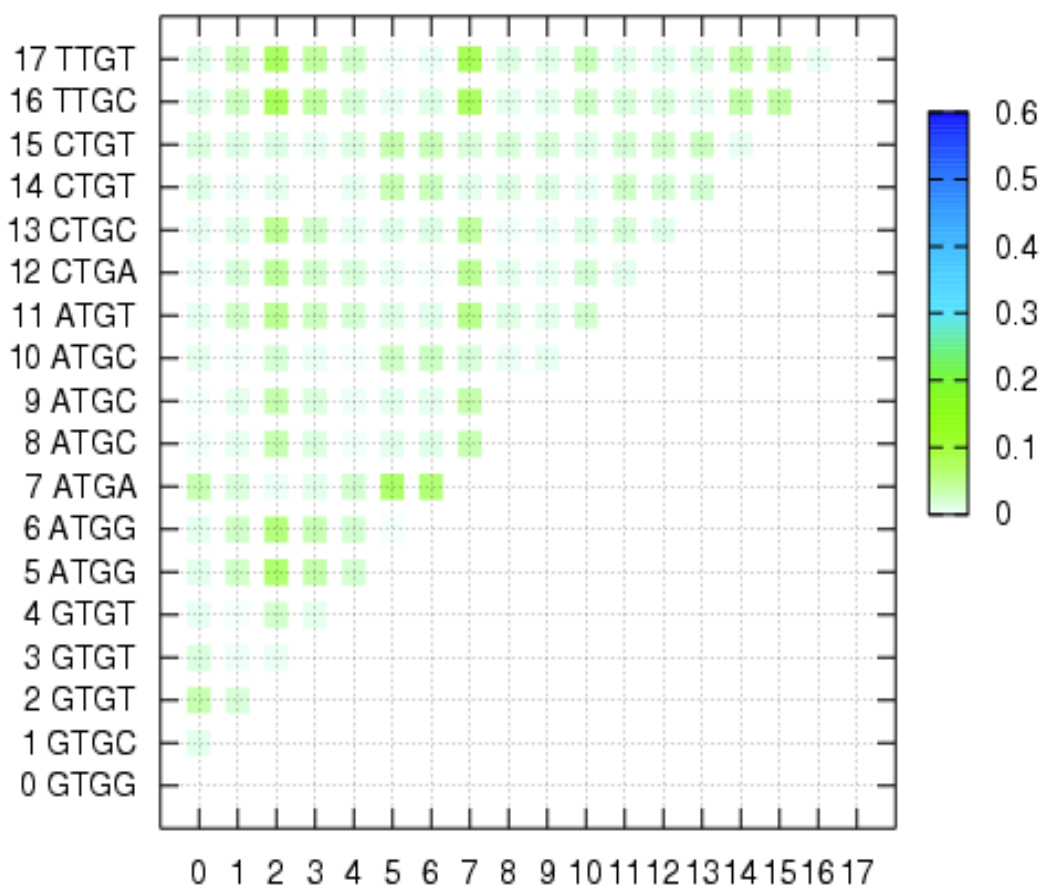

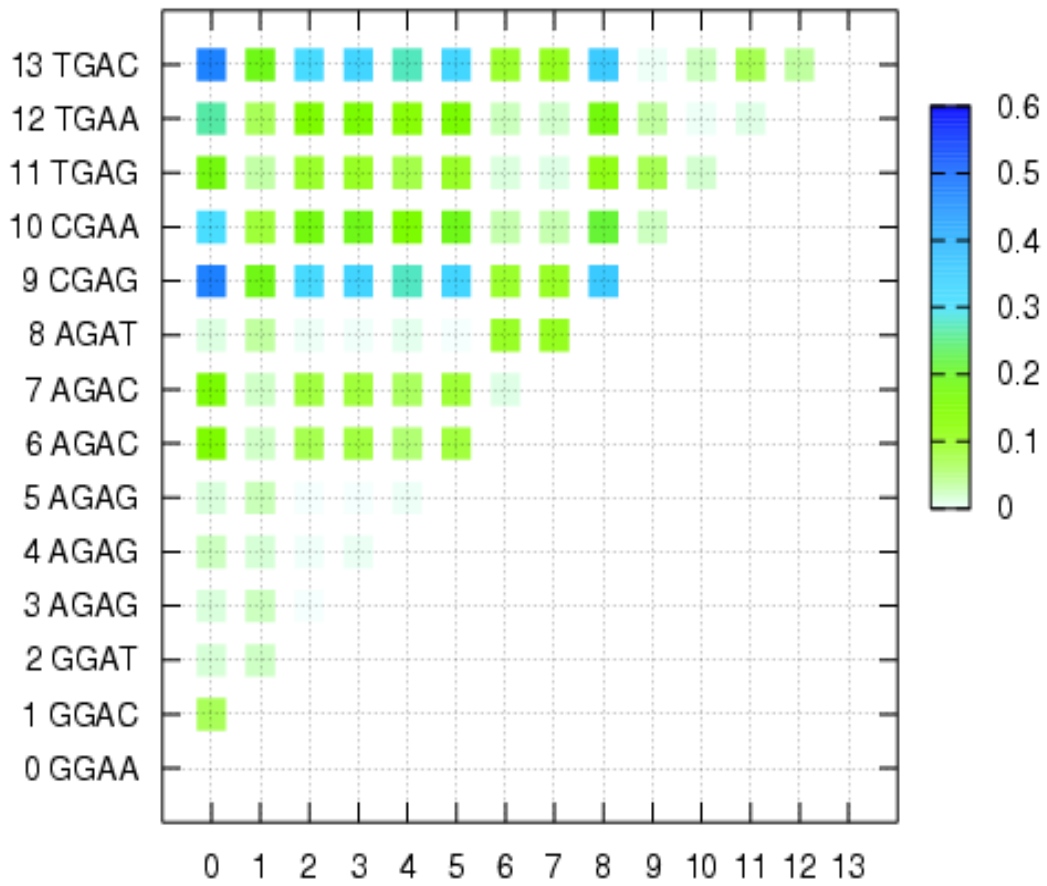

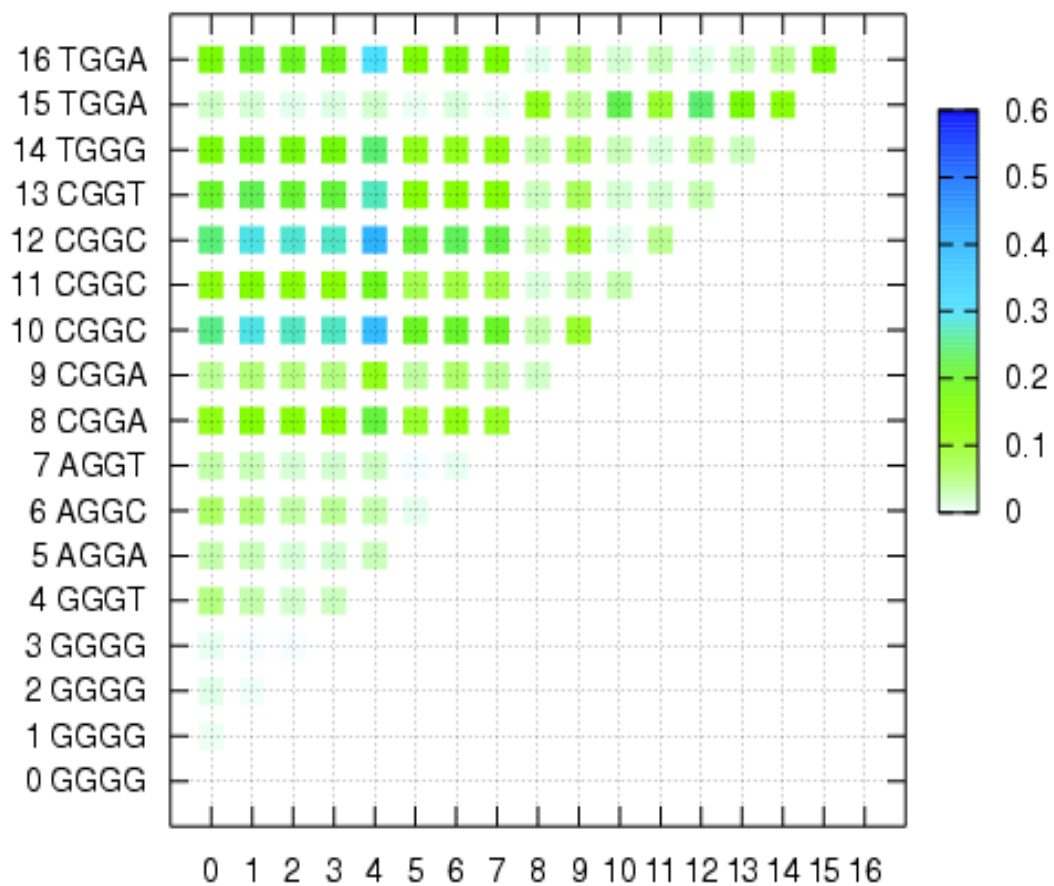



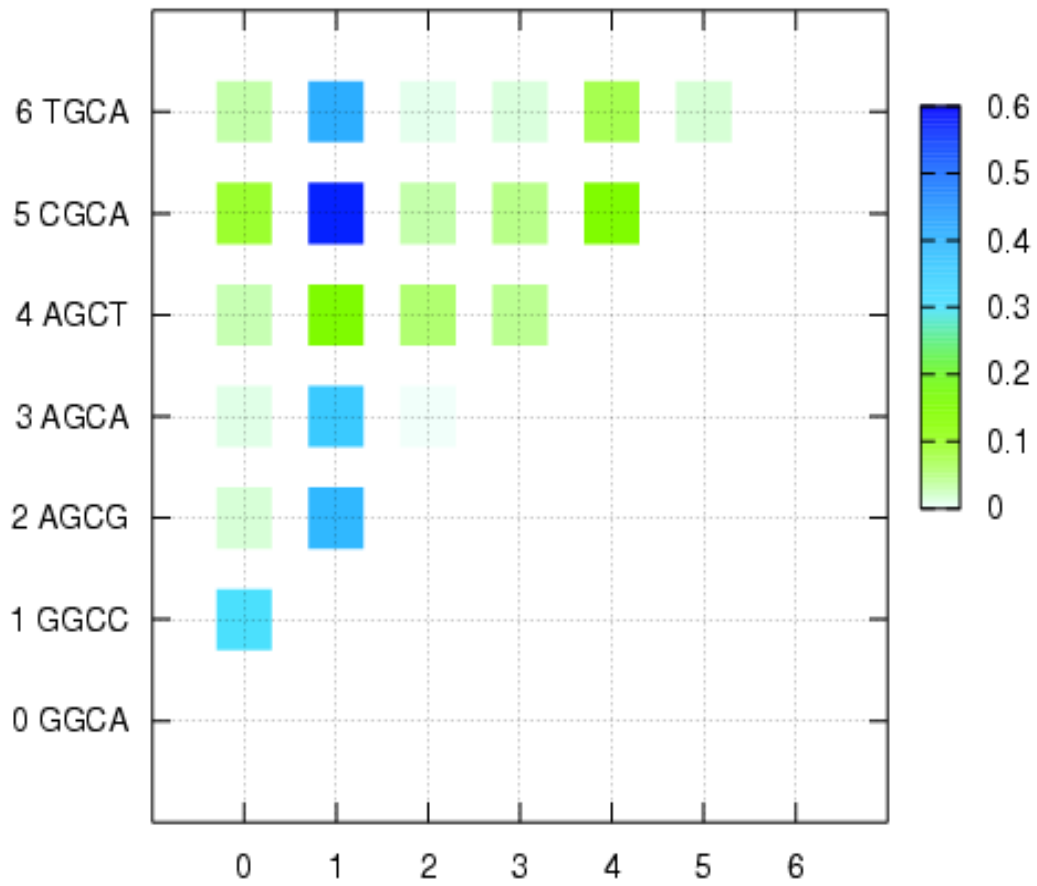

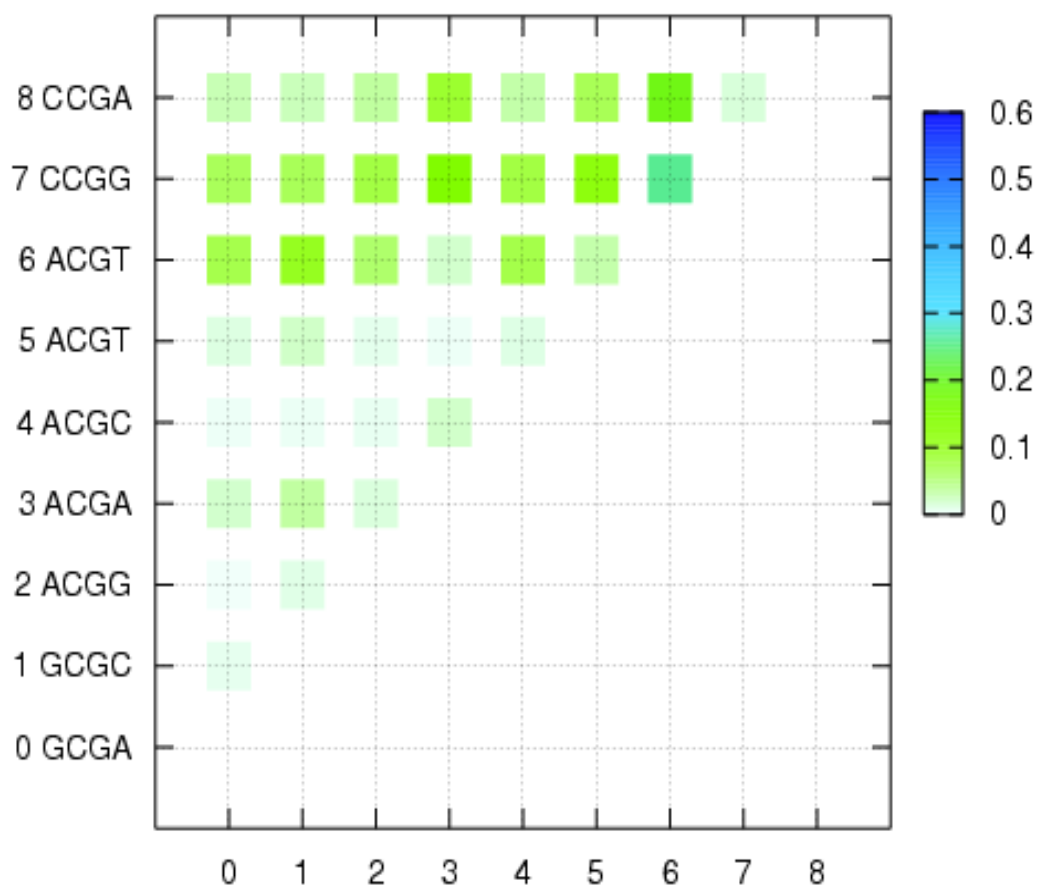

Supplement: biophysj_105.067397_7.pdf [file biophysj_105.067397_7.pdf]

Tik

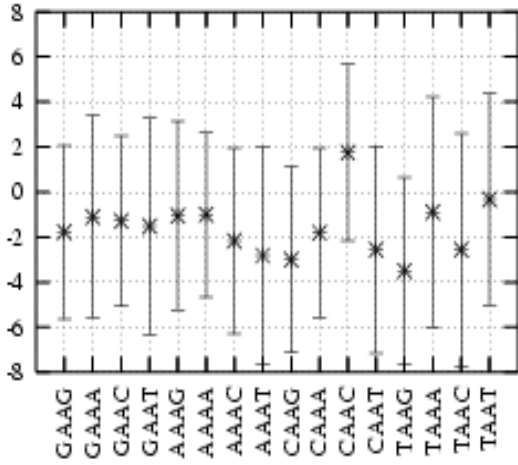

Roll

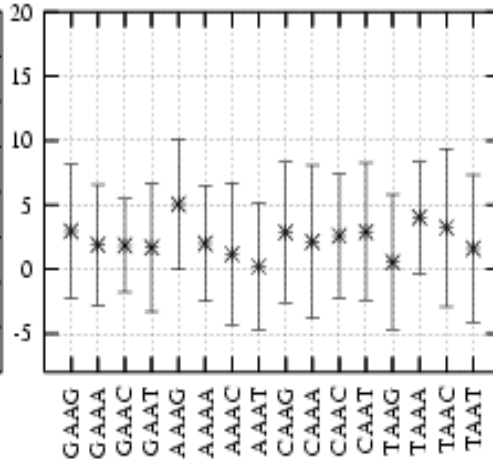

Twist

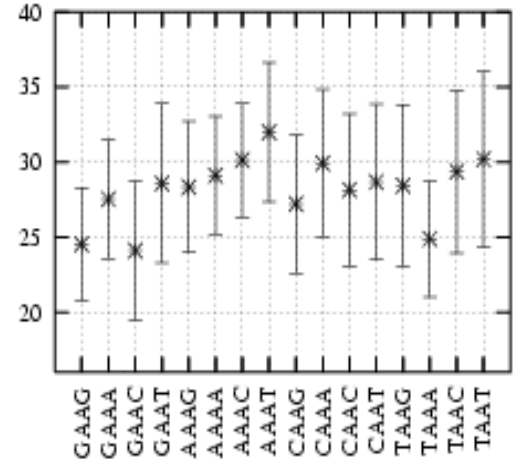

Shift

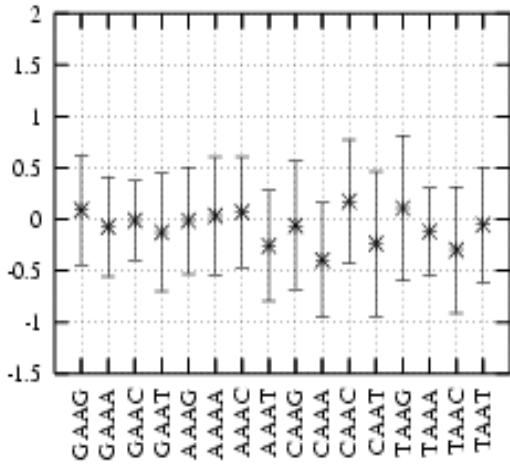

Slide

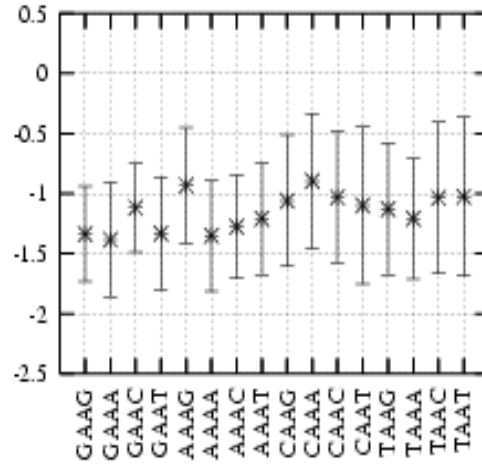

Rise

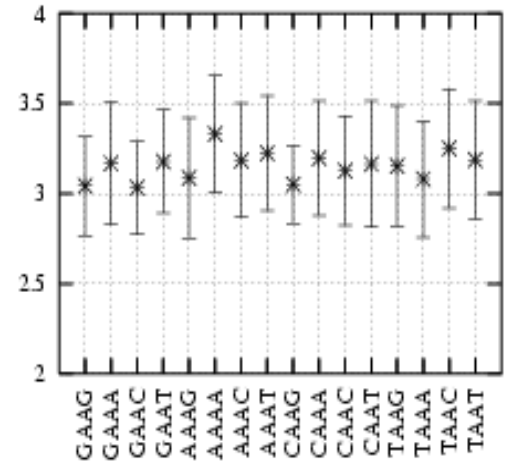

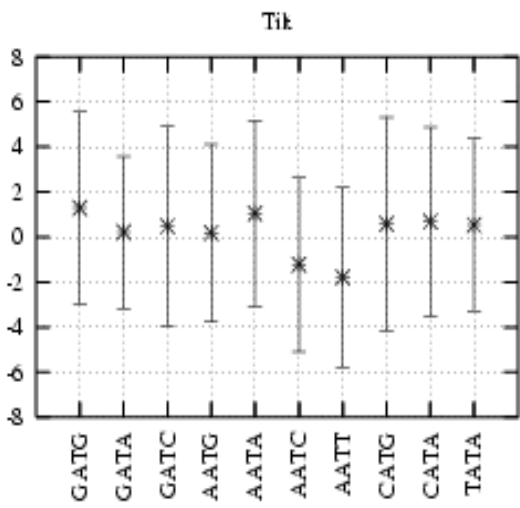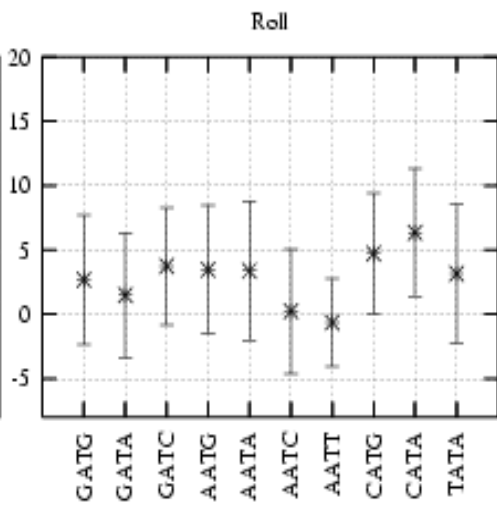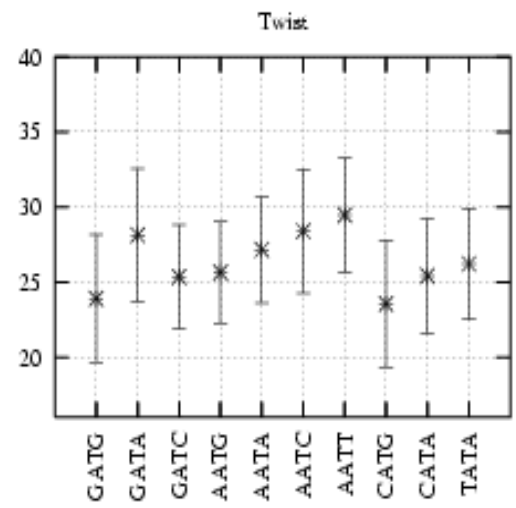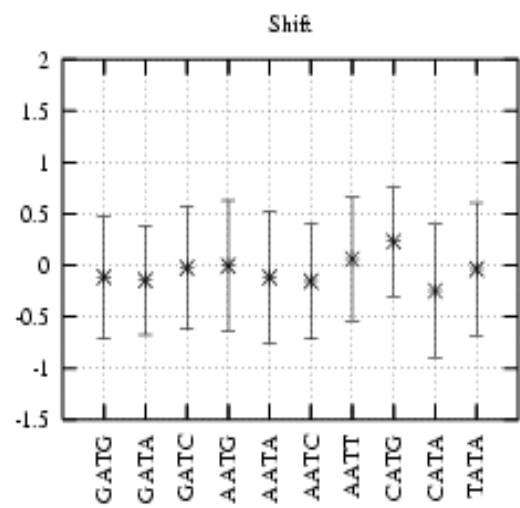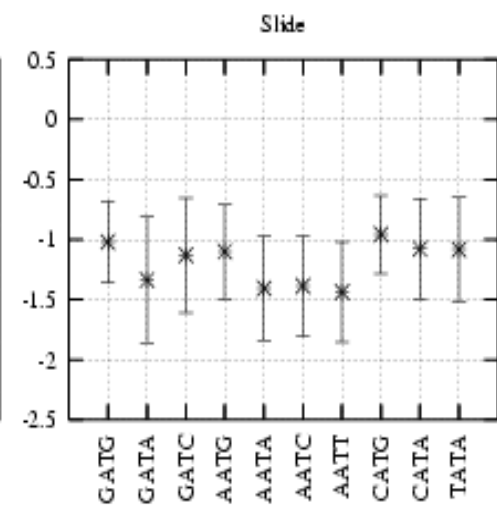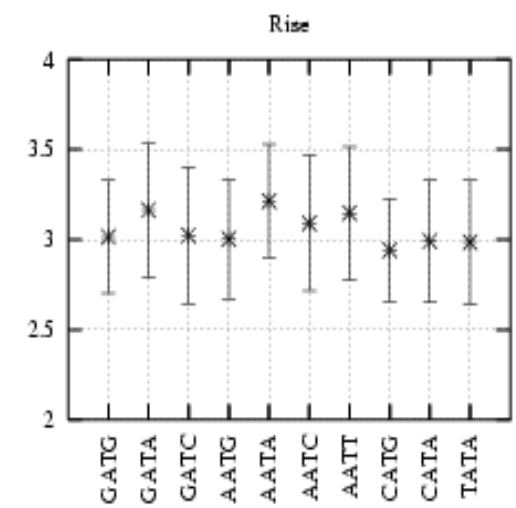

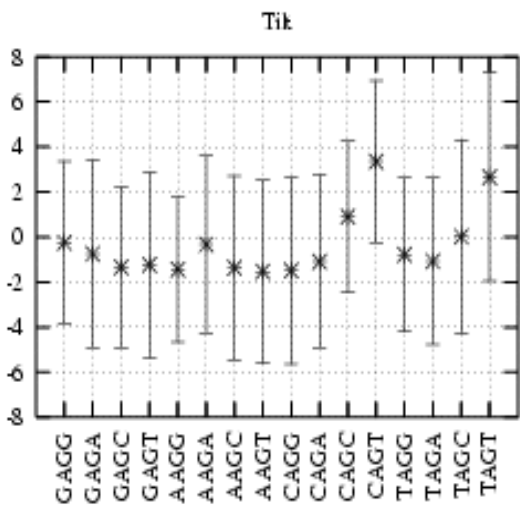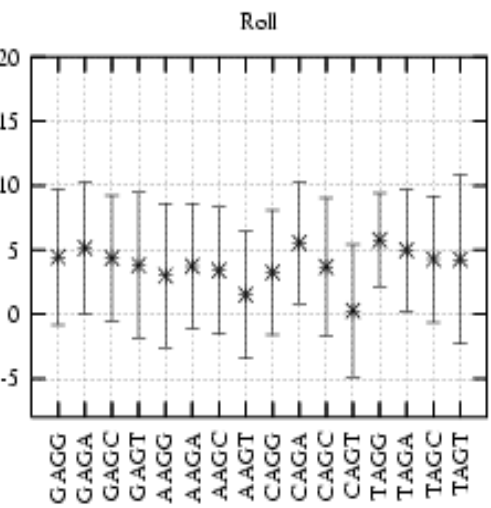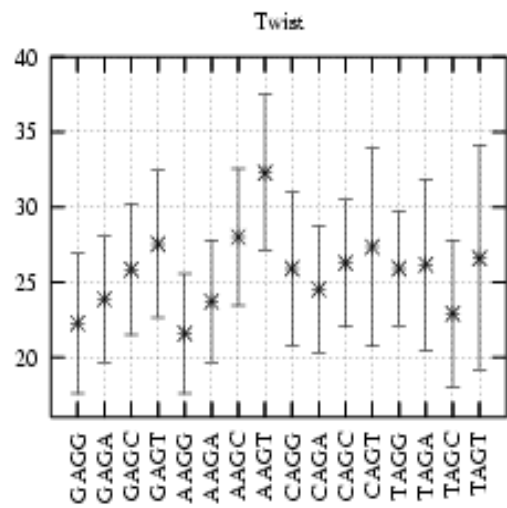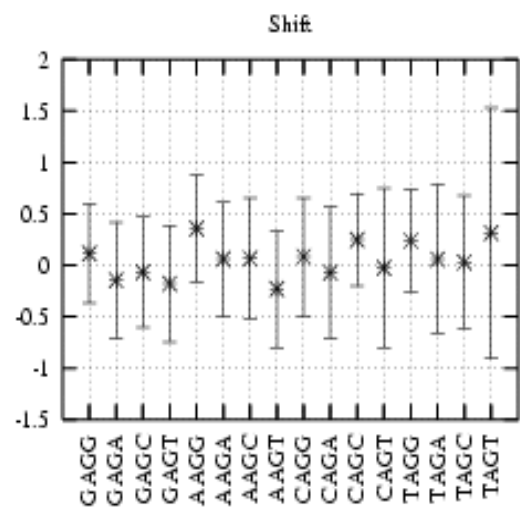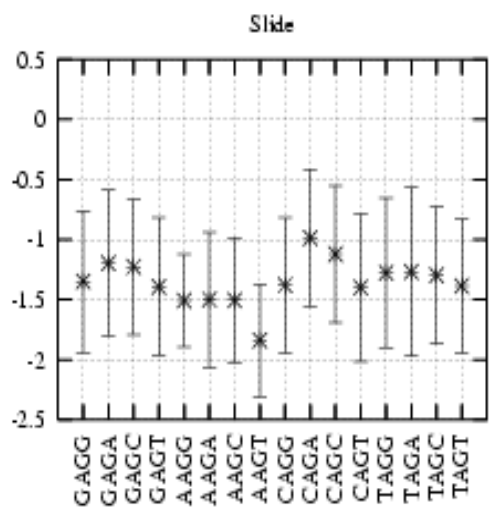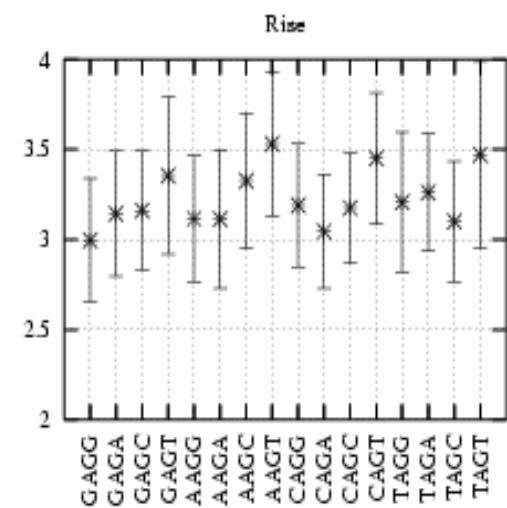

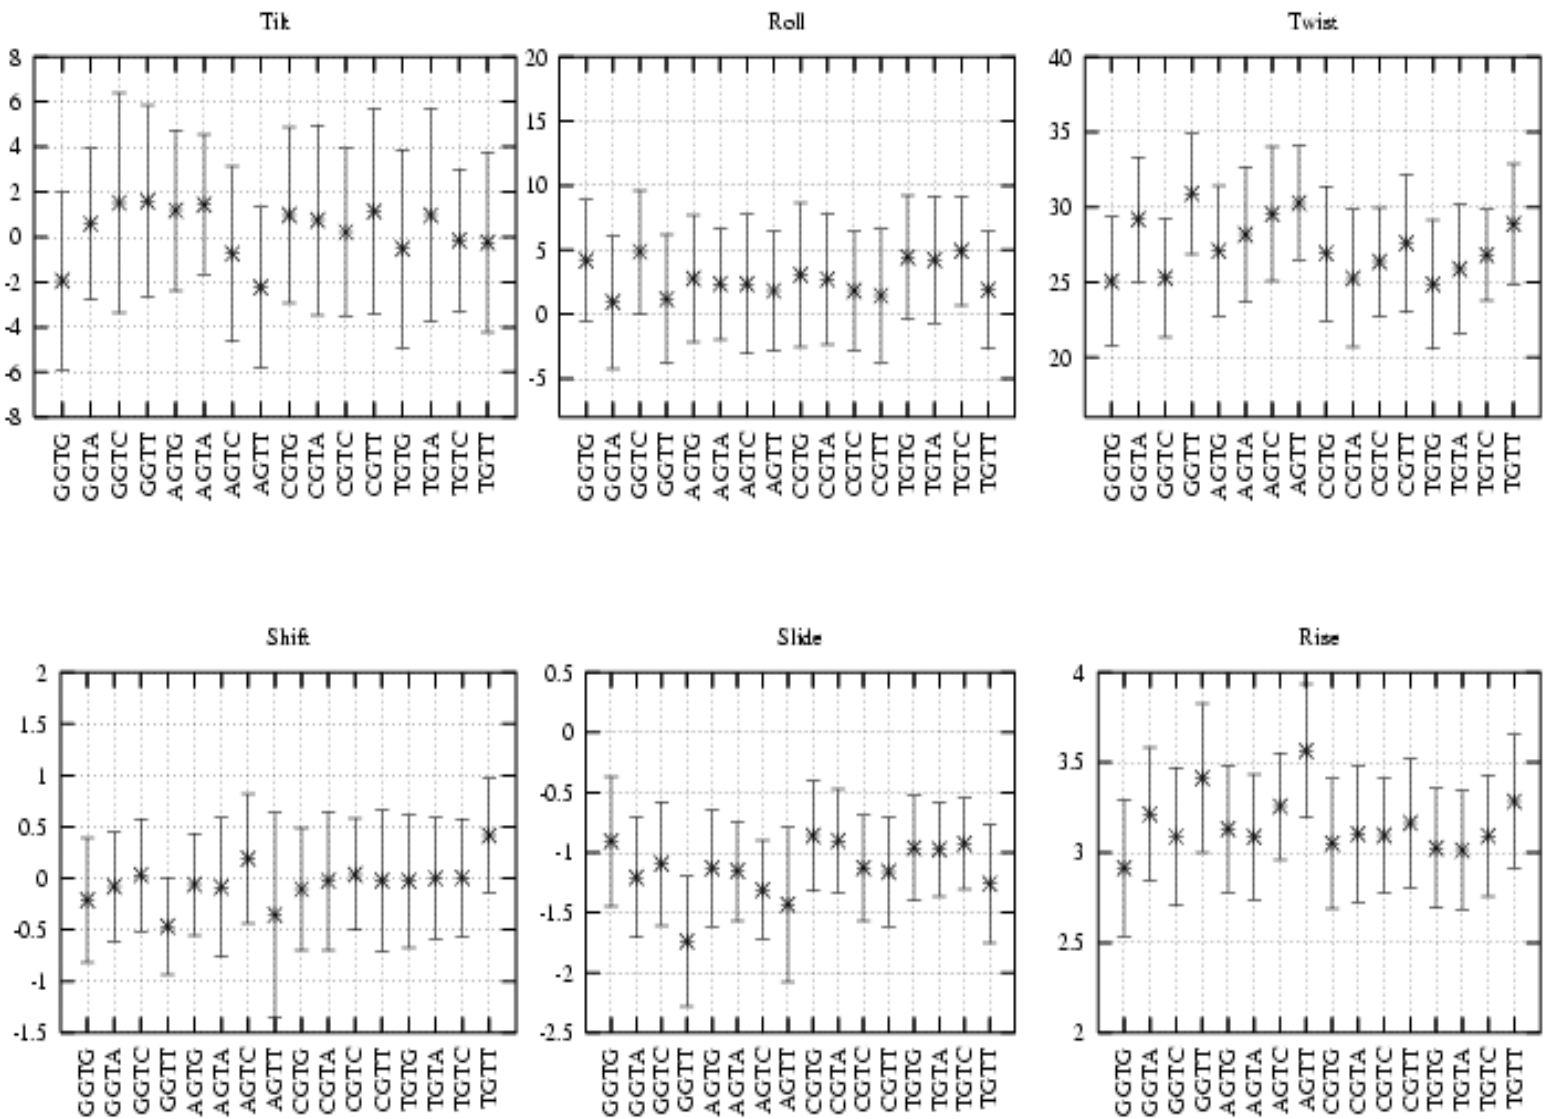

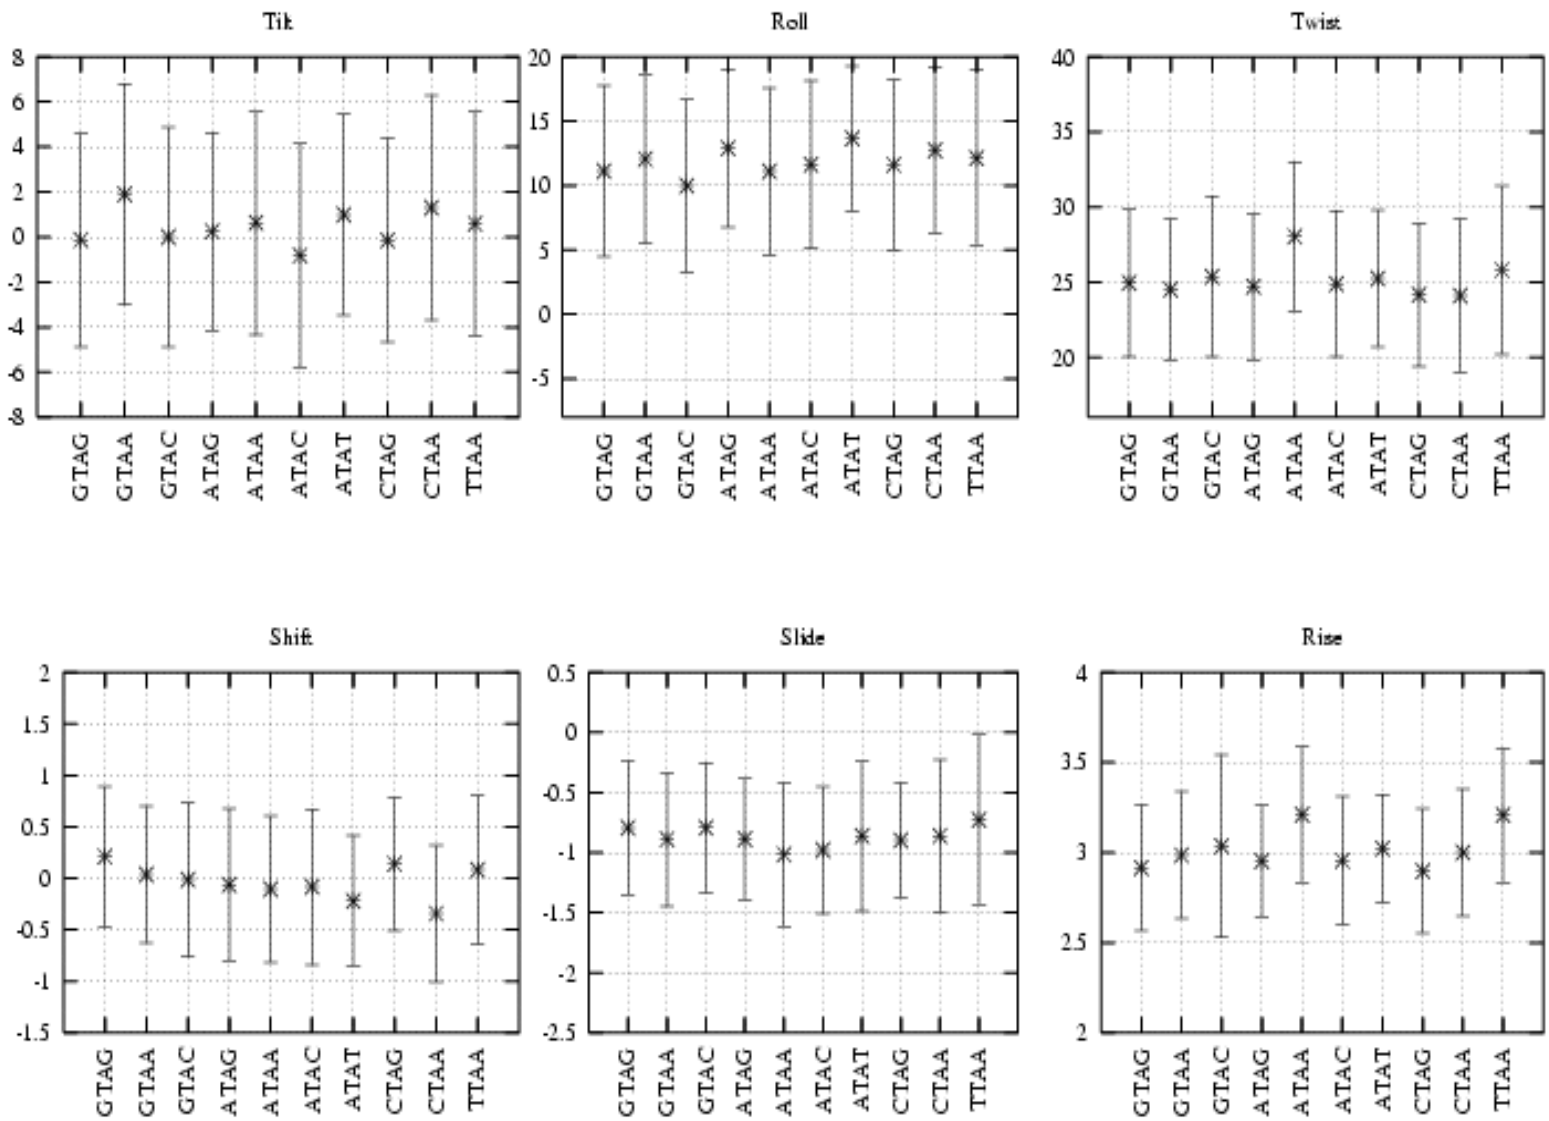

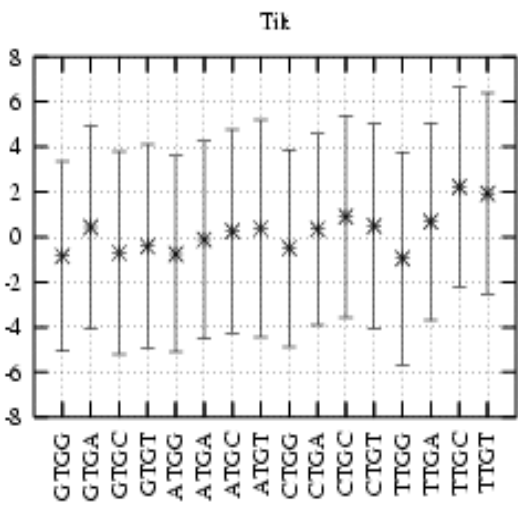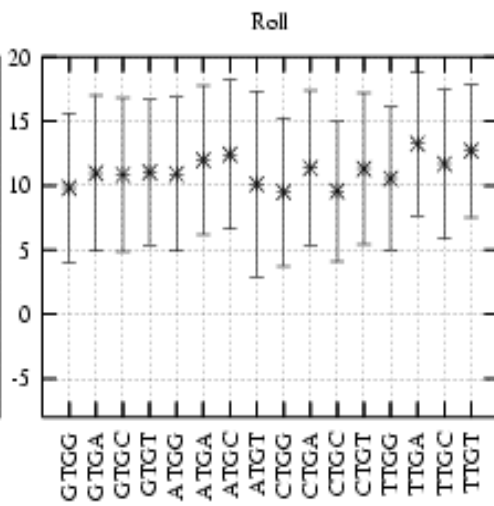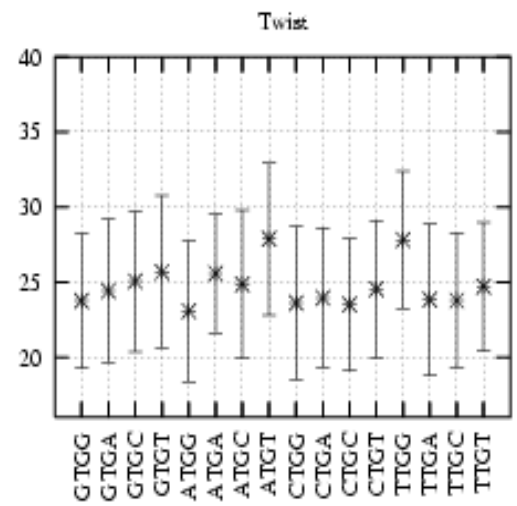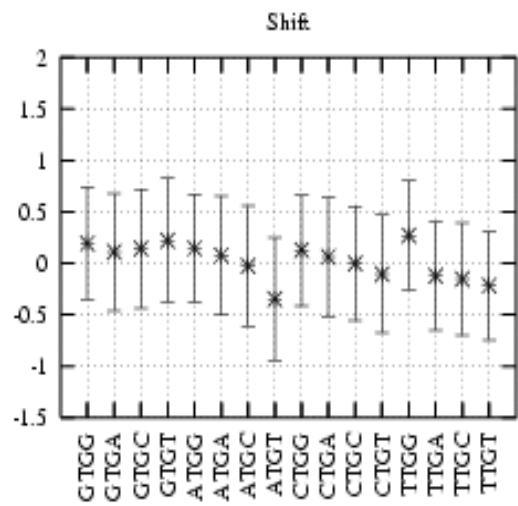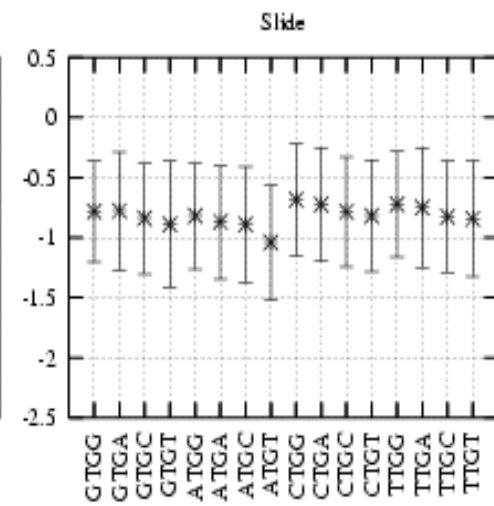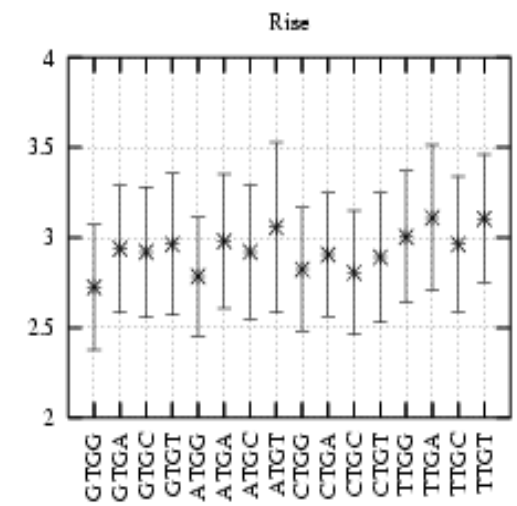

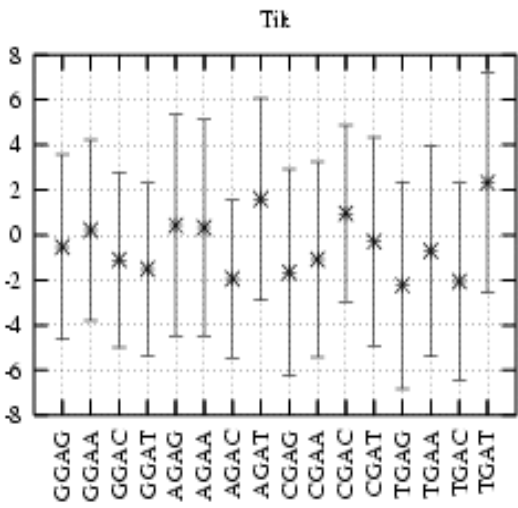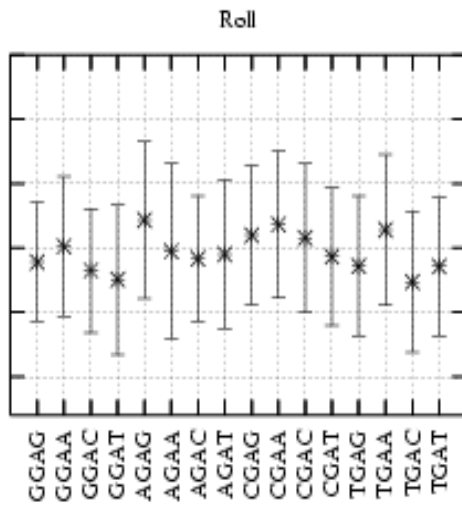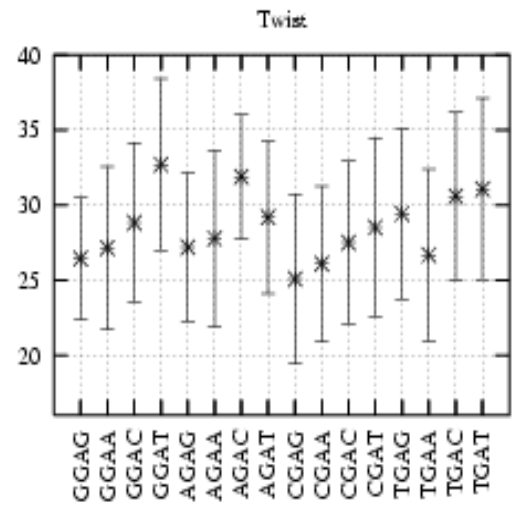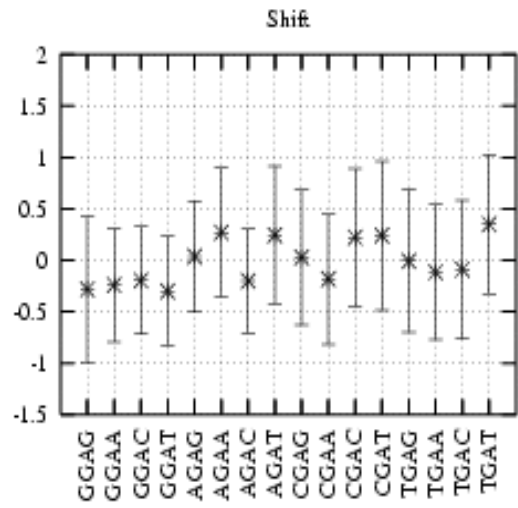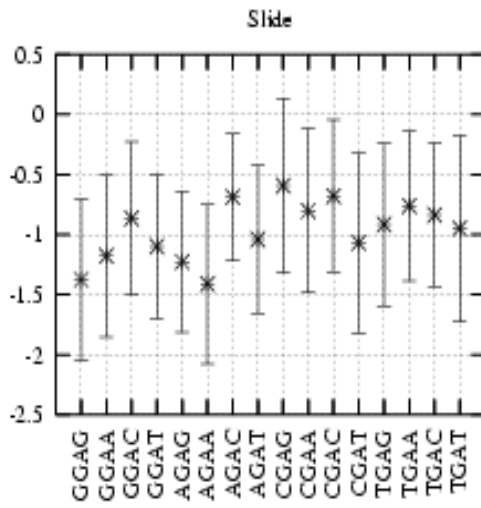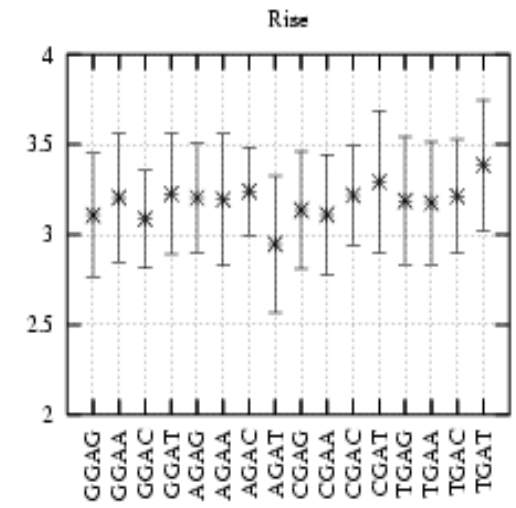

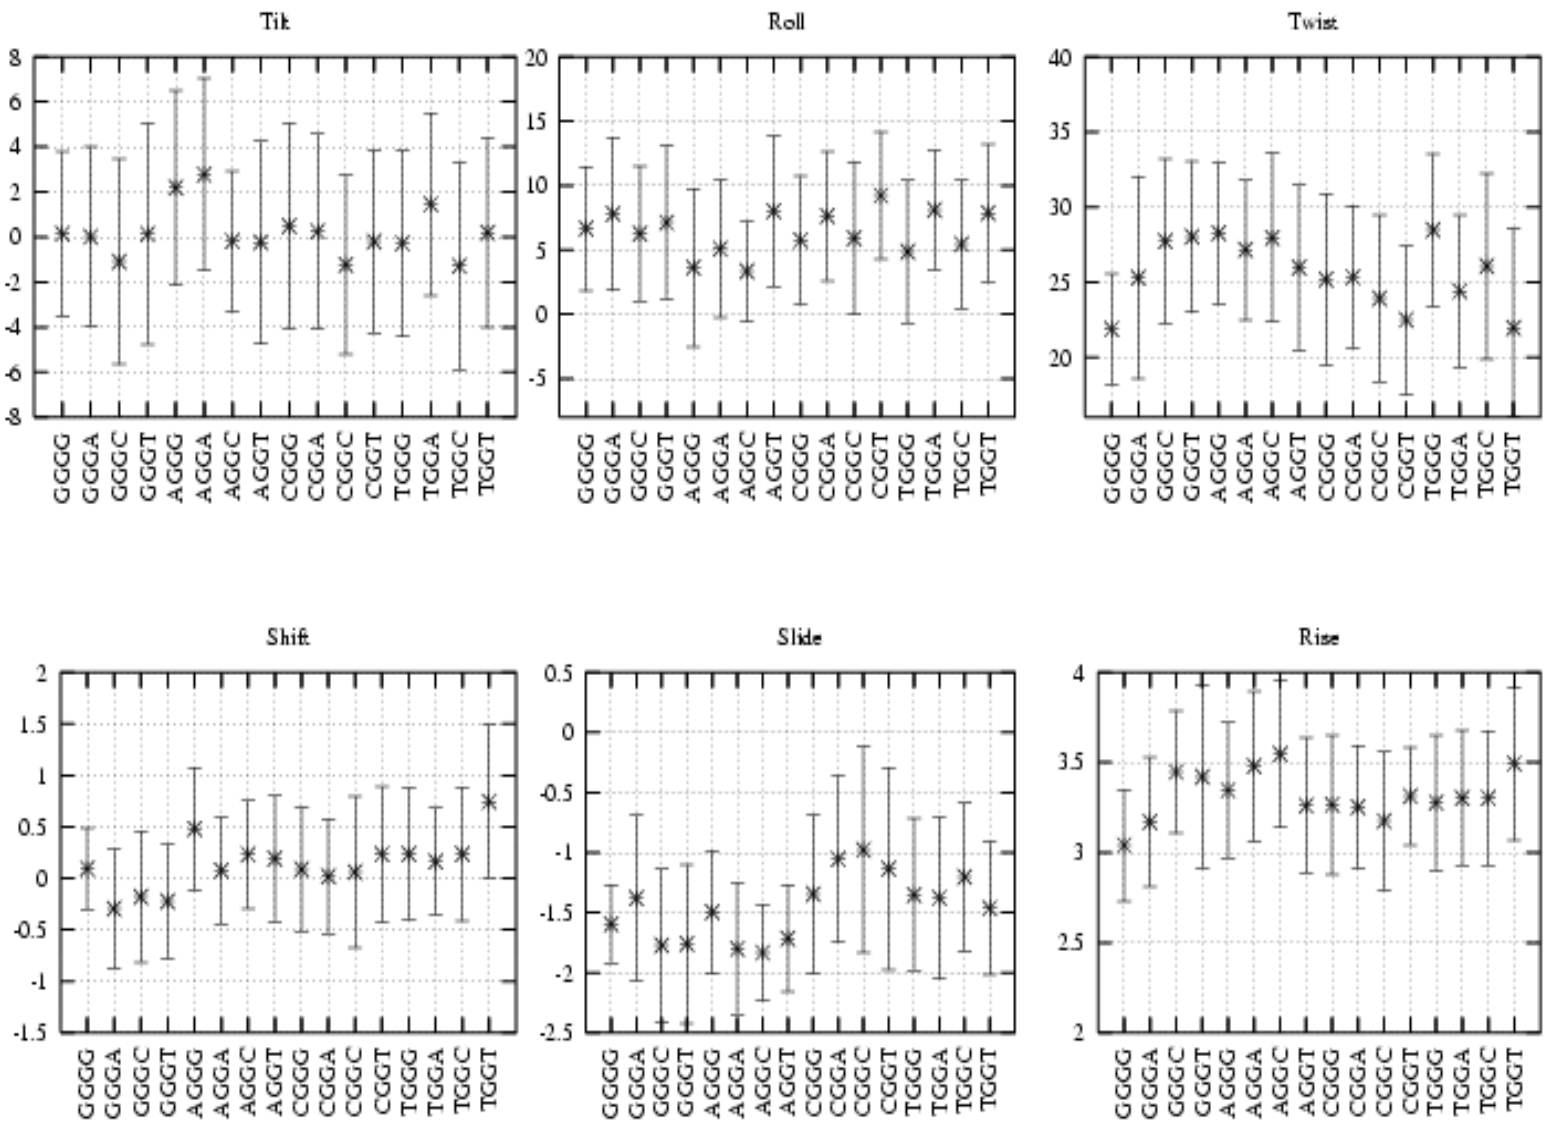



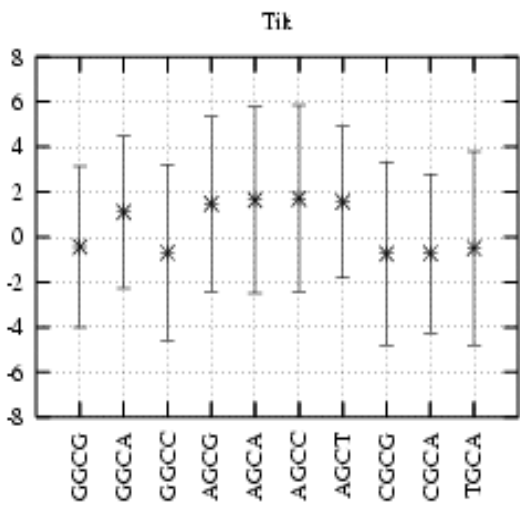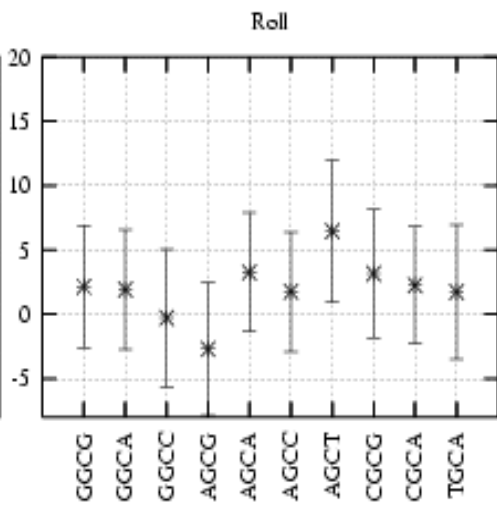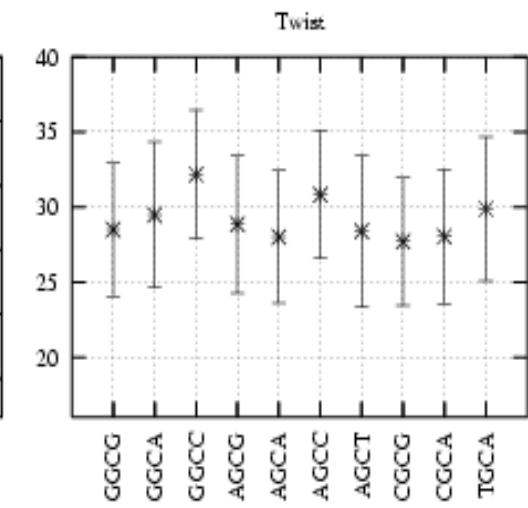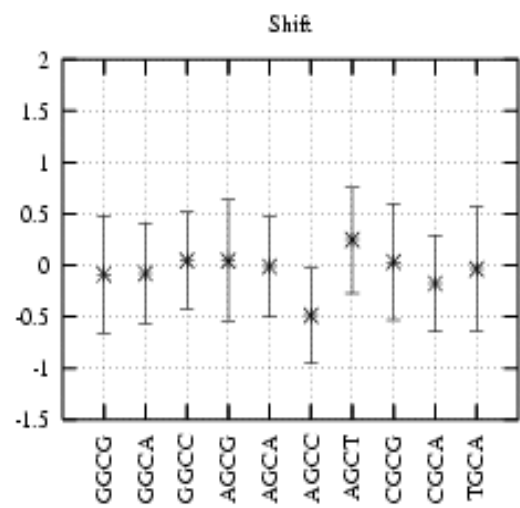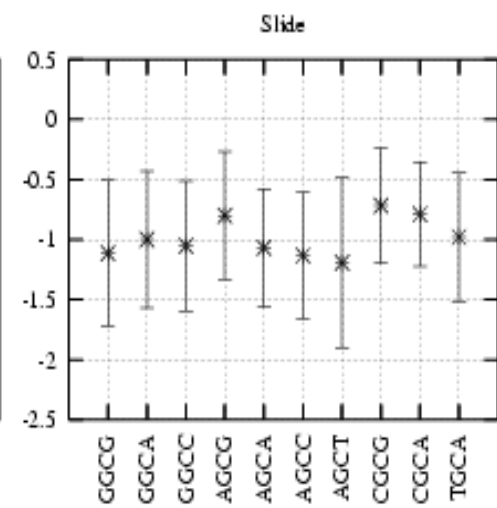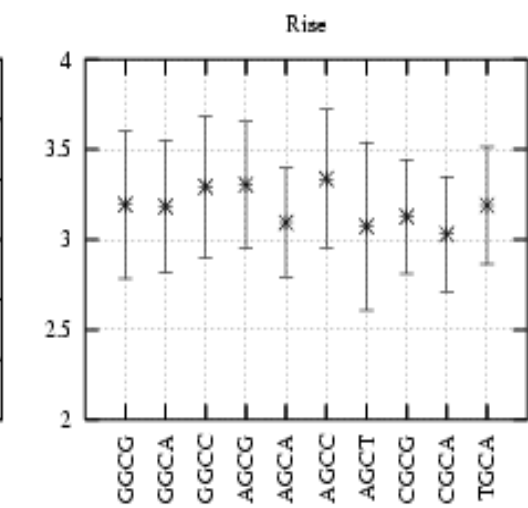

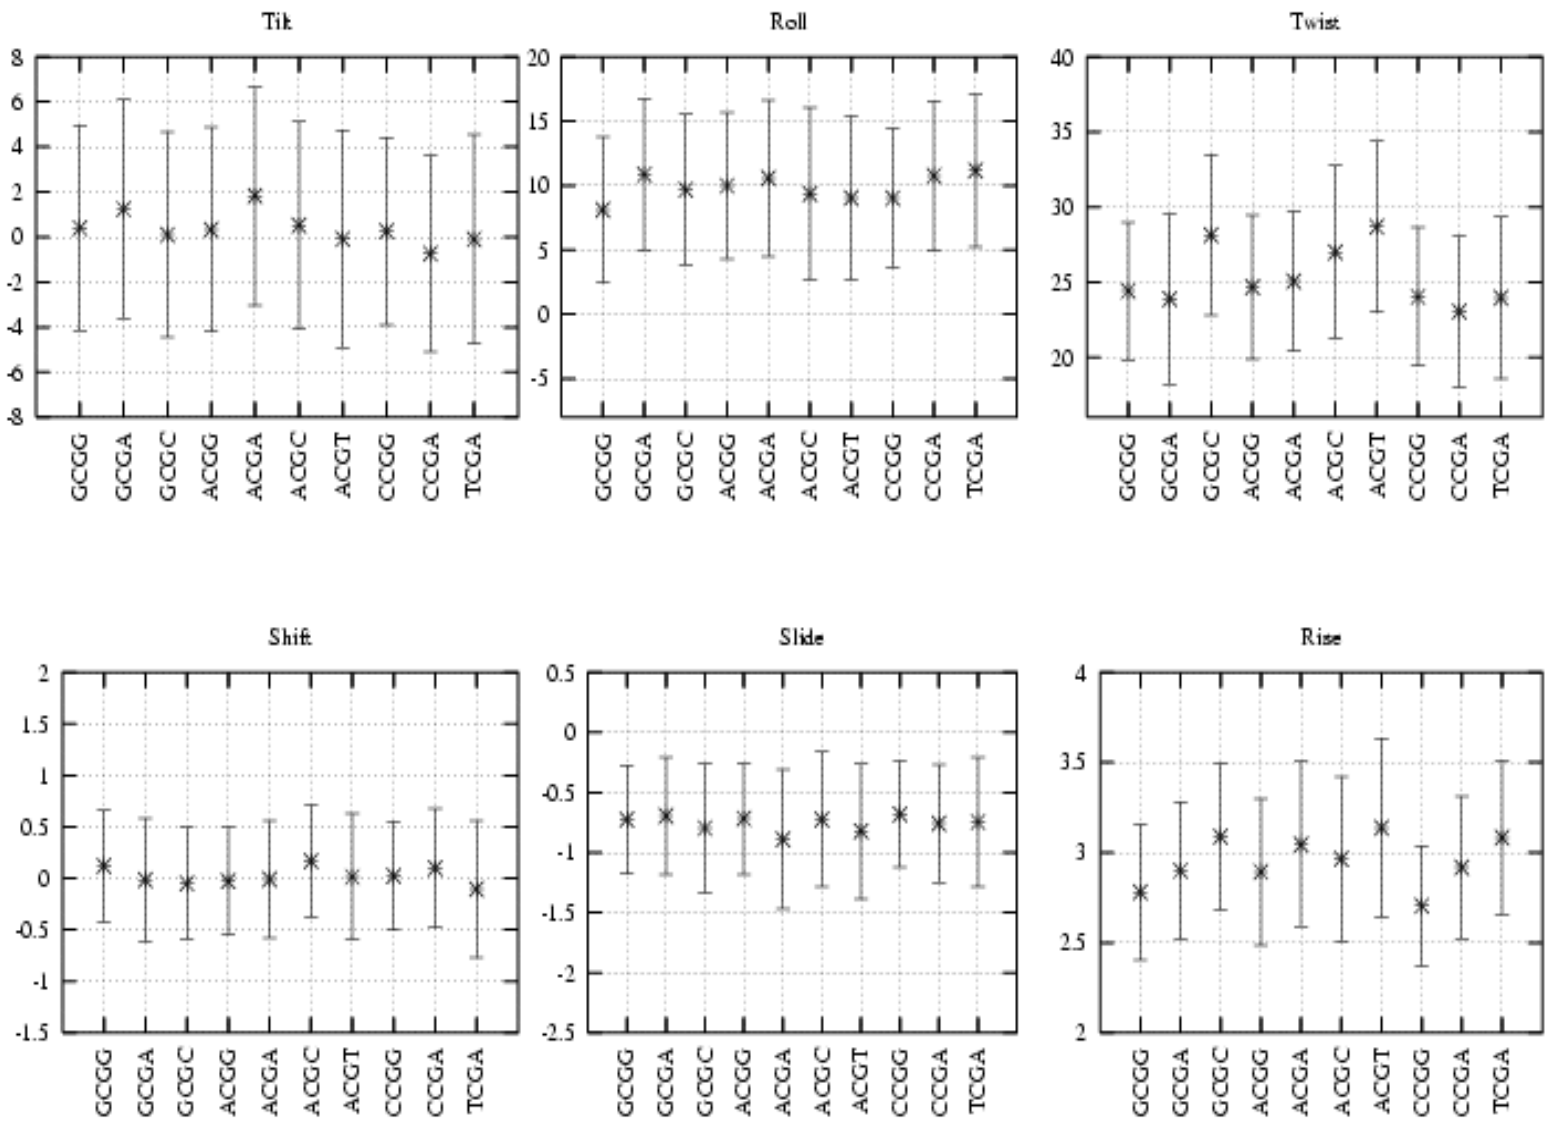

Supplement: biophysj_105.067397_8.pdf [file biophysj_105.067397_8.pdf]
